# Supplementary material
Source: PubMed Central journal article supplement (PMC6923798)
Supplement: NIHMS1062667-supplement-supple.pdf [file NIHMS1062667-supplement-supple.pdf]

**Supplementary data**

**1,3,4-Oxadiazole/chalcone hybrids: Design, synthesis, and inhibition of leukemia cell growth and EGFR, Src, IL-6 and STAT3 activities**

Marwa Ali A. Fathi<sup>a,¶</sup>, Amer Ali Abd El-Hafeez<sup>b,c,d,¶,\*</sup>, Dalia Abdelhamid<sup>a</sup>, Samar H. Abbas<sup>a,\*</sup>,  
Monica M. Montano<sup>d</sup>, Mohamed Abdel-Aziz<sup>a</sup>

<sup>a</sup>**Medicinal Chemistry Department, Faculty of Pharmacy, Minia University, Minia 61519, Egypt.**

<sup>b</sup>**Pharmacology and Experimental Oncology Unit, Cancer Biology Department, National Cancer Institute, Cairo University, Cairo, 11796, Egypt.**

<sup>c</sup>**Pharmacotherapy Department, Graduate School of Biomedical and Health Sciences, Hiroshima University, Hiroshima 734-8553, Japan,**

<sup>d</sup>**Pharmacology Department, Case Western Reserve University School of Medicine, 10900 Euclid Avenue, Cleveland, Ohio 44106, USA.**

| List of Figures |                                                                            |          |
|-----------------|----------------------------------------------------------------------------|----------|
| Fig. No         |                                                                            | Page No. |
| 1               | <sup>1</sup> H NMR of compound 8a (500 MHz, DMSO- <i>d</i> <sub>6</sub> )  | 7        |
| 2               | <sup>13</sup> C NMR of compound 8a (125 MHz, DMSO- <i>d</i> <sub>6</sub> ) | 8        |
| 3               | <sup>1</sup> H NMR of compound 8b (500 MHz, DMSO- <i>d</i> <sub>6</sub> )  | 9        |
| 4               | <sup>13</sup> C NMR of compound 8b (125 MHz, DMSO- <i>d</i> <sub>6</sub> ) | 10       |
| 5               | <sup>1</sup> H NMR of compound 8c (500 MHz, DMSO- <i>d</i> <sub>6</sub> )  | 11       |
| 6               | <sup>13</sup> C NMR of compound 8c (125 MHz, DMSO- <i>d</i> <sub>6</sub> ) | 12       |
| 7               | <sup>1</sup> H NMR of compound 8d (500 MHz, DMSO- <i>d</i> <sub>6</sub> )  | 13       |
| 8               | <sup>13</sup> C NMR of compound 8d (125 MHz, DMSO- <i>d</i> <sub>6</sub> ) | 14       |
| 9               | <sup>1</sup> H NMR of compound 8e (500 MHz, DMSO- <i>d</i> <sub>6</sub> )  | 15       |
| 10              | <sup>13</sup> C NMR of compound 8e (125 MHz, DMSO- <i>d</i> <sub>6</sub> ) | 16       |
| 11              | <sup>1</sup> H NMR of compound 8f (500 MHz, DMSO- <i>d</i> <sub>6</sub> )  | 17       |
| 12              | <sup>13</sup> C NMR of compound 8f (125 MHz, DMSO- <i>d</i> <sub>6</sub> ) | 18       |
| 13              | <sup>1</sup> H NMR of compound 8g (500 MHz, DMSO- <i>d</i> <sub>6</sub> )  | 19       |
| 14              | <sup>13</sup> C NMR of compound 8g (125 MHz, DMSO- <i>d</i> <sub>6</sub> ) | 20       |
| 15              | <sup>1</sup> H NMR of compound 8h (500 MHz, DMSO- <i>d</i> <sub>6</sub> )  | 21       |
| 16              | <sup>13</sup> C NMR of compound 8h (125 MHz, DMSO- <i>d</i> <sub>6</sub> ) | 22       |
| 17              | <sup>1</sup> H NMR of compound 8i (500 MHz, DMSO- <i>d</i> <sub>6</sub> )  | 23       |
| 18              | <sup>13</sup> C NMR of compound 8i (125 MHz, DMSO- <i>d</i> <sub>6</sub> ) | 24       |
| 19              | <sup>1</sup> H NMR of compound 8j (500 MHz, DMSO- <i>d</i> <sub>6</sub> )  | 25       |
| 20              | <sup>13</sup> C NMR of compound 8j (125 MHz, DMSO- <i>d</i> <sub>6</sub> ) | 26       |
| 21              | <sup>1</sup> H NMR of compound 8k (500 MHz, DMSO- <i>d</i> <sub>6</sub> )  | 27       |
| 22              | <sup>13</sup> C NMR of compound 8k (125 MHz, DMSO- <i>d</i> <sub>6</sub> ) | 28       |
| 23              | <sup>1</sup> H NMR of compound 8l (500 MHz, DMSO- <i>d</i> <sub>6</sub> )  | 29       |
| 24              | <sup>13</sup> C NMR of compound 8l (125 MHz, DMSO- <i>d</i> <sub>6</sub> ) | 30       |
| 25              | <sup>1</sup> H NMR of compound 8m (500 MHz, DMSO- <i>d</i> <sub>6</sub> )  | 31       |
| 26              | <sup>13</sup> C NMR of compound 8m (125 MHz, DMSO- <i>d</i> <sub>6</sub> ) | 32       |
| 27              | <sup>1</sup> H NMR of compound 8n (500 MHz, DMSO- <i>d</i> <sub>6</sub> )  | 33       |

|    |                                                                               |    |
|----|-------------------------------------------------------------------------------|----|
| 28 | <sup>13</sup> C NMR of compound 8n (125 MHz, DMSO- <i>d</i> <sub>6</sub> )    | 34 |
| 29 | <sup>1</sup> H NMR of compound 8o (500 MHz, DMSO- <i>d</i> <sub>6</sub> )     | 35 |
| 30 | <sup>13</sup> C NMR of compound 8o (125 MHz, DMSO- <i>d</i> <sub>6</sub> )    | 36 |
| 31 | <sup>1</sup> H NMR of compound 8p (500 MHz, DMSO- <i>d</i> <sub>6</sub> )     | 37 |
| 32 | <sup>13</sup> C NMR of compound 8p (125 MHz, DMSO- <i>d</i> <sub>6</sub> )    | 38 |
| 33 | <sup>1</sup> H NMR of compound 8q (500 MHz, DMSO- <i>d</i> <sub>6</sub> )     | 39 |
| 34 | <sup>13</sup> C NMR of compound 8q (125 MHz, DMSO- <i>d</i> <sub>6</sub> )    | 40 |
| 35 | <sup>1</sup> H NMR of compound 8r (500 MHz, DMSO- <i>d</i> <sub>6</sub> )     | 41 |
| 36 | <sup>13</sup> C NMR of compound 8r (125 MHz, DMSO- <i>d</i> <sub>6</sub> )    | 42 |
| 37 | <sup>1</sup> H NMR of compound 8s (500 MHz, CDCl <sub>3</sub> )               | 43 |
| 38 | <sup>13</sup> C NMR of compound 8s (125 MHz, CDCl <sub>3</sub> )              | 44 |
| 39 | <sup>1</sup> H NMR of compound 8t (500 MHz, DMSO- <i>d</i> <sub>6</sub> )     | 45 |
| 40 | <sup>13</sup> C NMR of compound 8t (125 MHz, DMSO- <i>d</i> <sub>6</sub> )    | 46 |
| 41 | <sup>1</sup> H NMR of compound 8u (500 MHz, DMSO- <i>d</i> <sub>6</sub> )     | 47 |
| 42 | <sup>13</sup> C NMR of compound 8u (125 MHz, DMSO- <i>d</i> <sub>6</sub> )    | 48 |
| 43 | <sup>1</sup> H NMR of compound 8v (500 MHz, DMSO- <i>d</i> <sub>6</sub> )     | 49 |
| 44 | <sup>13</sup> C NMR of compound 8v (125 MHz, DMSO- <i>d</i> <sub>6</sub> )    | 50 |
| 45 | <sup>1</sup> H NMR of compound 8w (500 MHz, DMSO- <i>d</i> <sub>6</sub> )     | 51 |
| 46 | <sup>13</sup> C NMR of compound 8w (125 MHz, DMSO- <i>d</i> <sub>6</sub> )    | 52 |
| 47 | <sup>1</sup> H NMR of compound 8x (500 MHz, DMSO- <i>d</i> <sub>6</sub> )     | 53 |
| 48 | <sup>13</sup> C NMR of compound 8x (125 MHz, DMSO- <i>d</i> <sub>6</sub> )    | 54 |
| 49 | One dose mean graph of nine different cancer cell line panels for compound 8a | 55 |
| 50 | One dose mean graph of nine different cancer cell line panels for compound 8b | 56 |
| 51 | One dose mean graph of nine different cancer cell line panels for compound 8c | 57 |
| 52 | One dose mean graph of nine different cancer cell line panels for compound 8d | 58 |
| 53 | One dose mean graph of nine different cancer cell line panels for compound 8e | 59 |

|     |                                                                                |    |
|-----|--------------------------------------------------------------------------------|----|
| 54  | One dose mean graph of nine different cancer cell line panels for compound 8f  | 60 |
| 55  | One dose mean graph of nine different cancer cell line panels for compound 8g  | 61 |
| 56  | One dose mean graph of nine different cancer cell line panels for compound 8h  | 62 |
| 57  | One dose mean graph of nine different cancer cell line panels for compound 8i  | 63 |
| 58  | One dose mean graph of nine different cancer cell line panels for compound 8j  | 64 |
| 59  | One dose mean graph of nine different cancer cell line panels for compound 8k  | 65 |
| 60  | One dose mean graph of nine different cancer cell line panels for compound 8l  | 66 |
| 61  | One dose mean graph of nine different cancer cell line panels for compound 8m  | 67 |
| 62  | One dose mean graph of nine different cancer cell line panels for compound 8n  | 68 |
| 63  | One dose mean graph of nine different cancer cell line panels for compound 8o  | 69 |
| 64  | One dose mean graph of nine different cancer cell line panels for compound 8p  | 70 |
| 65  | One dose mean graph of nine different cancer cell line panels for compound 8q  | 71 |
| 66  | One dose mean graph of nine different cancer cell line panels for compound 8r  | 72 |
| 67  | One dose mean graph of nine different cancer cell line panels for compound 8s  | 73 |
| 68  | One dose mean graph of nine different cancer cell line panels for compound 8t  | 74 |
| 69  | One dose mean graph of nine different cancer cell line panels for compound 8u  | 75 |
| 70  | One dose mean graph of nine different cancer cell line panels for compound 8v  | 76 |
| 71a | Five dose mean graph of nine different cancer cell line panels for compound 8v | 77 |
| 71b | Five dose mean graph of nine different cancer cell line panels for compound 8v | 78 |
| 71c | Five dose mean graph of nine different cancer cell line panels for compound 8v | 79 |
| 71d | Five dose mean graph of nine different cancer cell line panels for compound 8v | 80 |
| 72  | One dose mean graph of nine different cancer cell line panels for compound 8w  | 81 |
| 73  | One dose mean graph of nine different cancer cell line panels for compound 8x  | 82 |

|           |                                       |           |
|-----------|---------------------------------------|-----------|
| <b>74</b> | <b>Chromatogram of compound 8a</b>    | <b>83</b> |
| <b>75</b> | <b>Chromatogram of compound 8e</b>    | <b>84</b> |
| <b>76</b> | <b>Chromatogram of compound 8o</b>    | <b>85</b> |
| <b>77</b> | <b>LC-MS spectrum of compound 8a.</b> | <b>86</b> |
| <b>78</b> | <b>LC-MS spectrum of compound 8n.</b> | <b>87</b> |
| <b>79</b> | <b>LC-MS spectrum of compound 8v.</b> | <b>88</b> |

## List of Tables

| <b>Table<br/>No.</b> |                                                                                                      | <b>Page<br/>No.</b> |
|----------------------|------------------------------------------------------------------------------------------------------|---------------------|
| <b>1</b>             | <b>Cell growth inhibition % from the NCI's in vitro human tumor cell screen for compounds 8a-l.</b>  | <b>89</b>           |
| <b>2</b>             | <b>Cell growth inhibition % from the NCI's in vitro human tumor cell screen for compounds 8m-8x.</b> | <b>87</b>           |

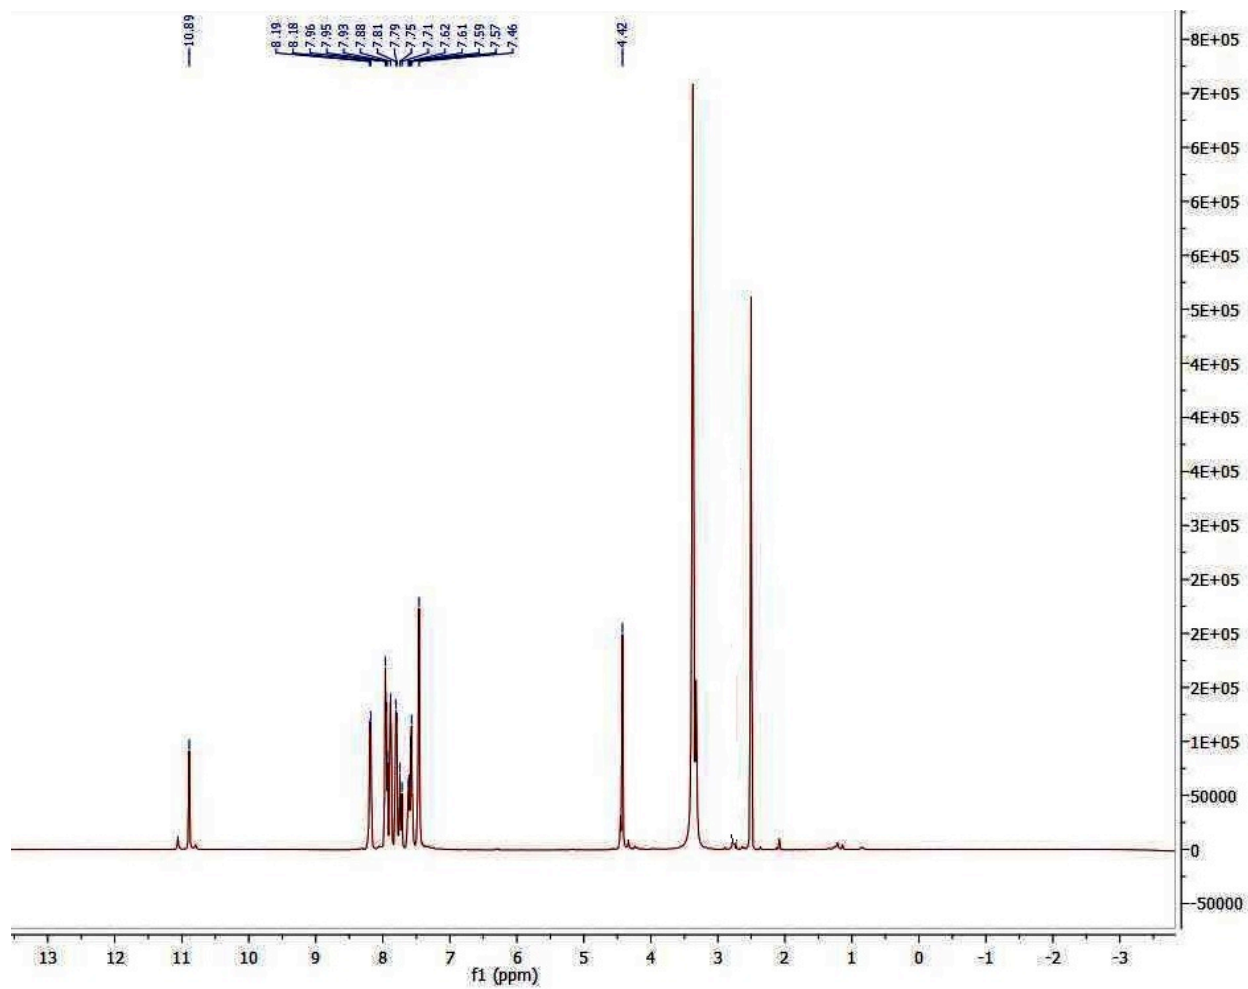

**Fig.1.**  $^1\text{H}$  NMR of compound 8a (500 MHz,  $\text{DMSO-}d_6$ )

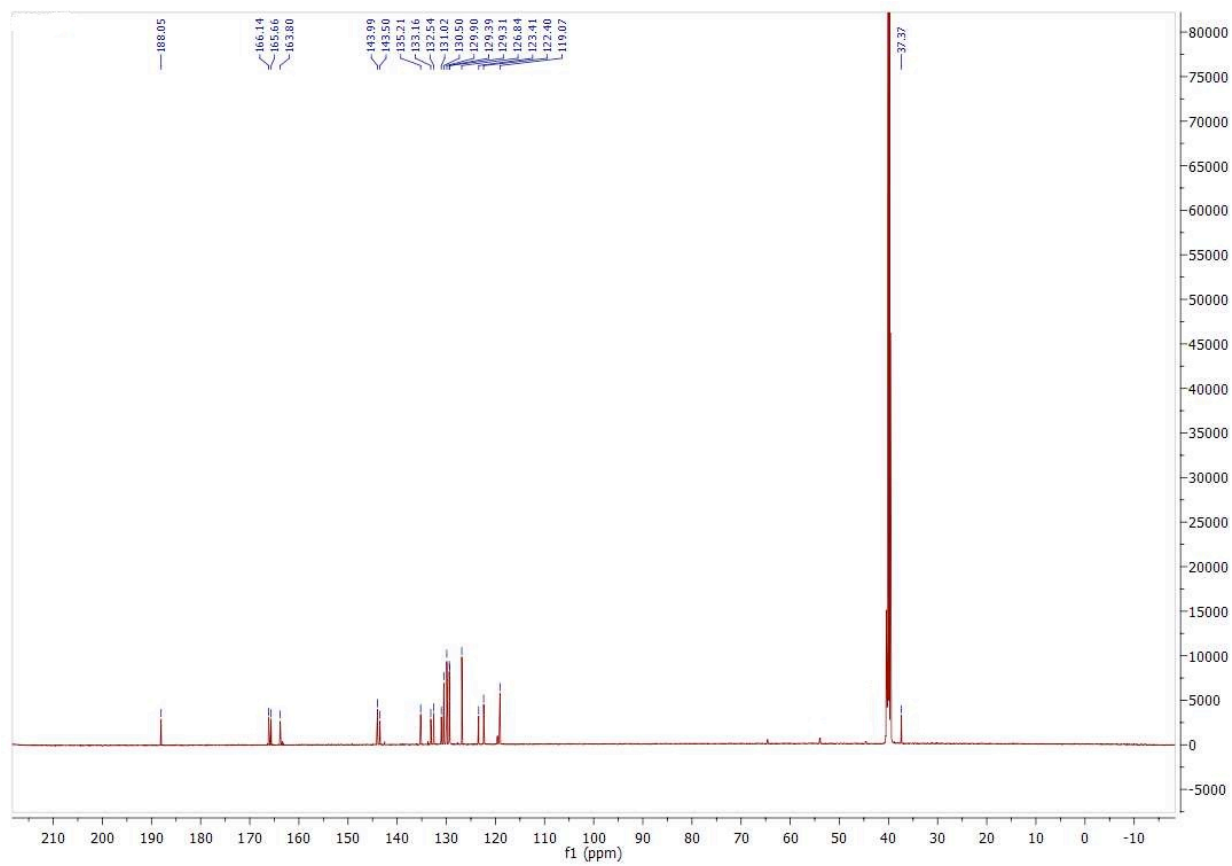

**Fig.2.**  $^{13}\text{C}$  NMR of compound 8a (125 MHz, DMSO- $d_6$ )



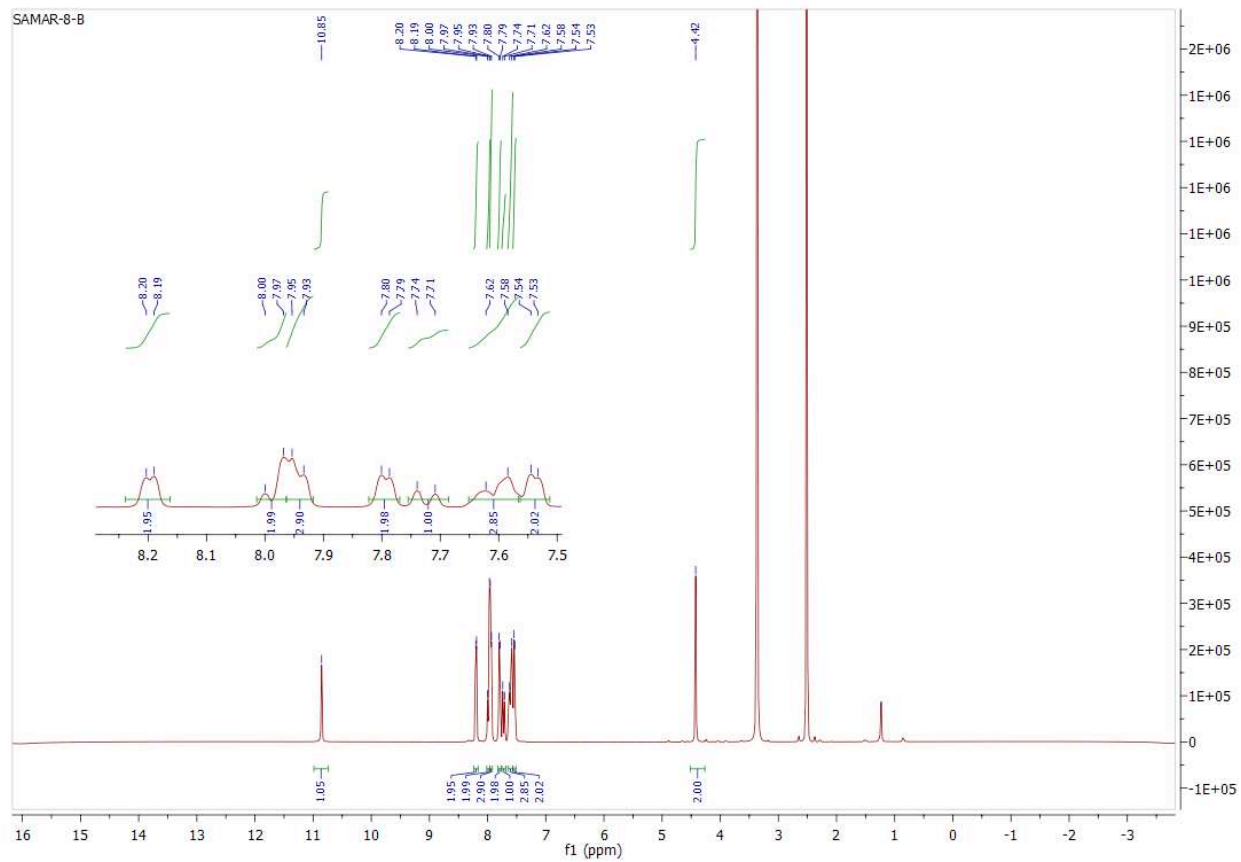

**Fig.3.**  $^1\text{H}$  NMR of compound 8b (500 MHz,  $\text{DMSO-}d_6$ )

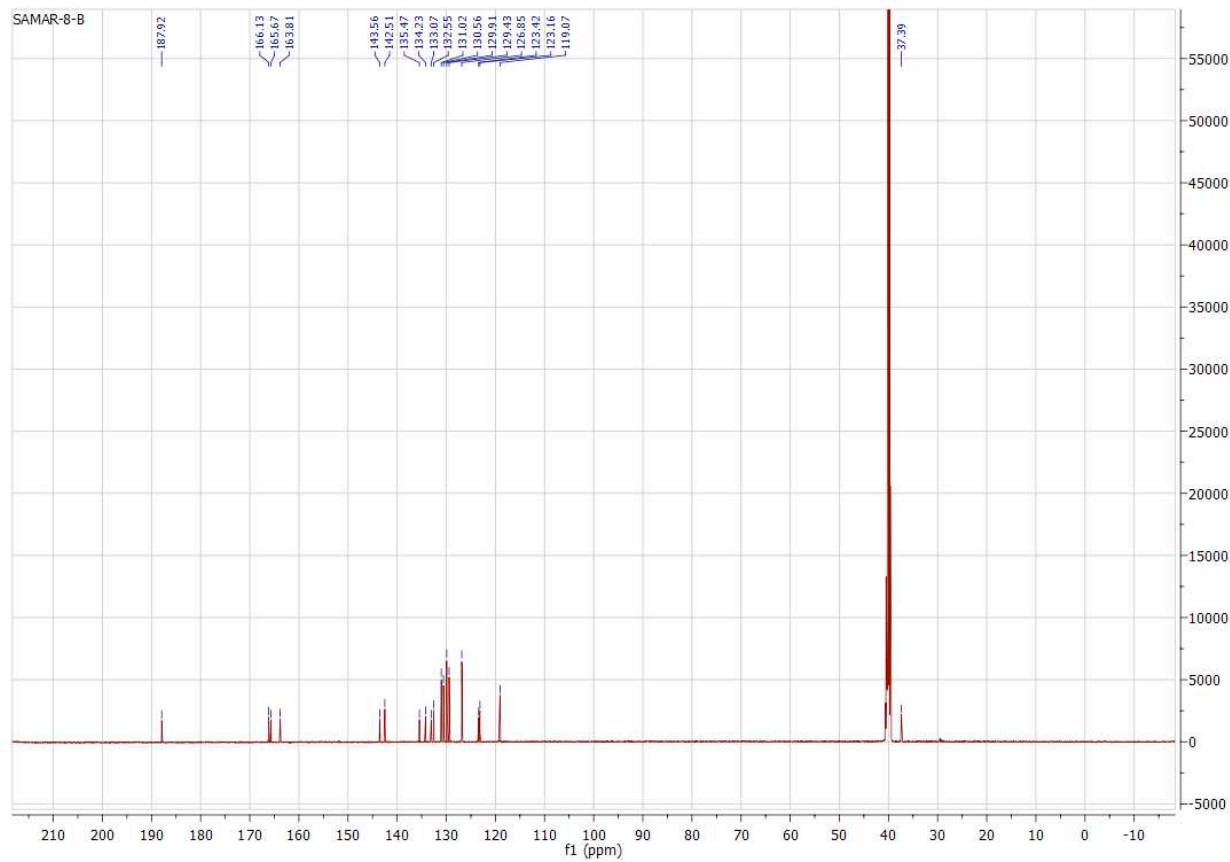

**Fig.4.**  $^{13}\text{C}$  NMR of compound 8b (125 MHz,  $\text{DMSO-}d_6$ )

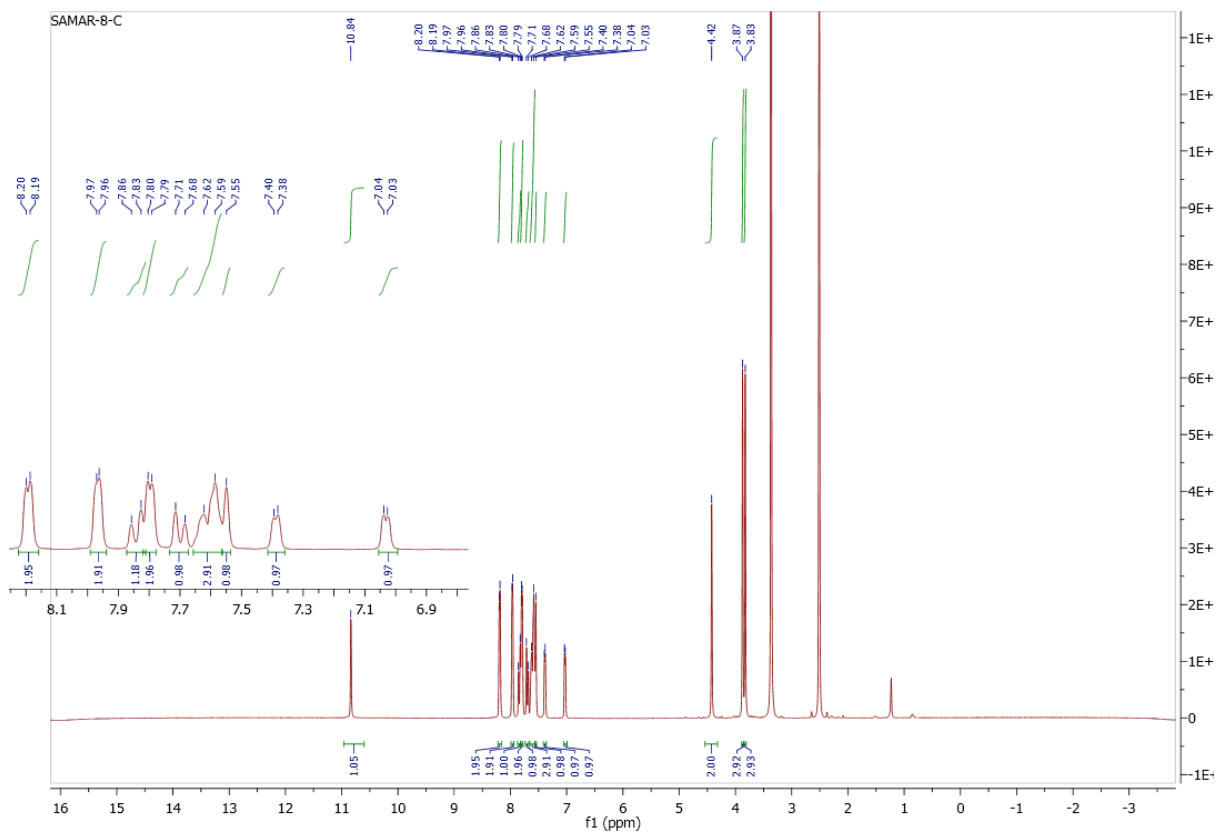

Fig.5.  $^1\text{H}$  NMR of compound 8c (500 MHz,  $\text{DMSO-}d_6$ )

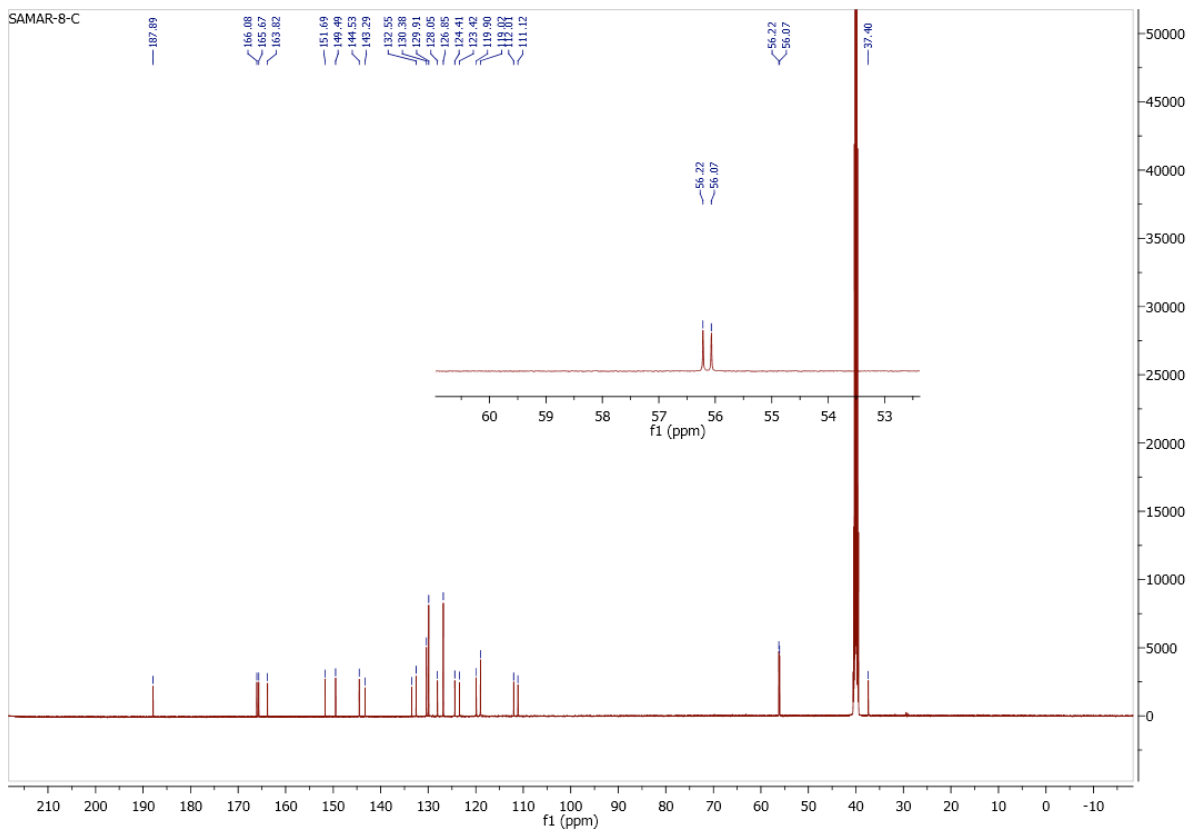

Fig.6.  $^{13}\text{C}$  NMR of compound 8c (125 MHz,  $\text{DMSO-}d_6$ )

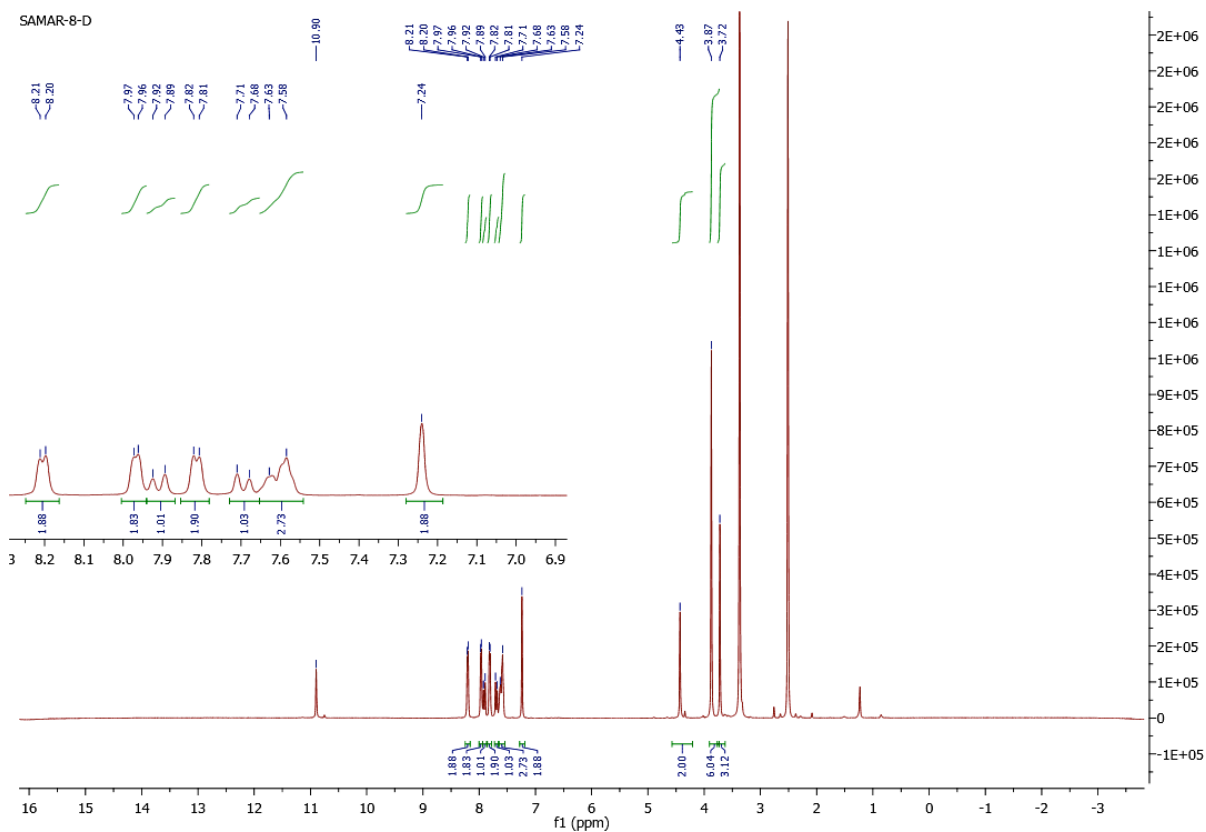

Fig.7.  $^1\text{H}$  NMR of compound 8d(500 MHz, DMSO- $d_6$ )

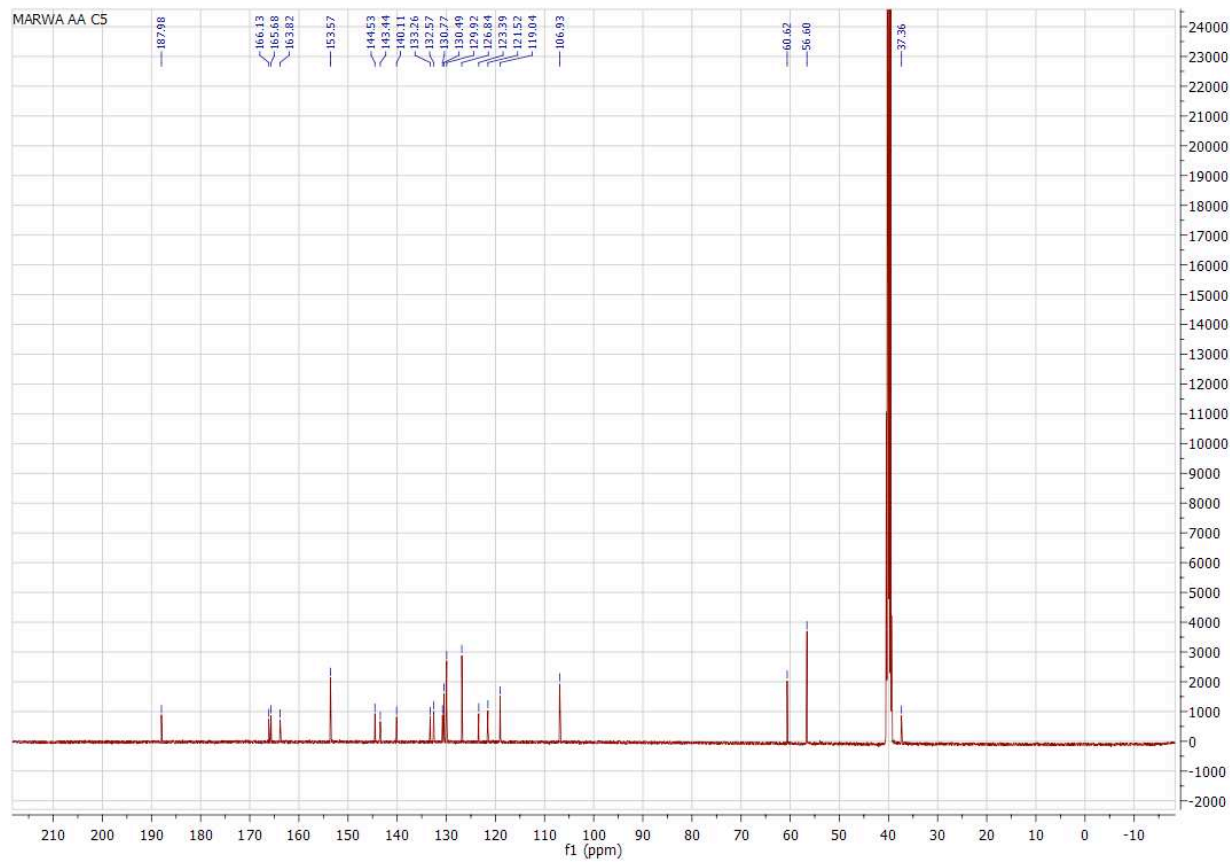

Fig.8.  $^{13}\text{C}$  NMR of compound 8d (125 MHz,  $\text{DMSO-}d_6$ )

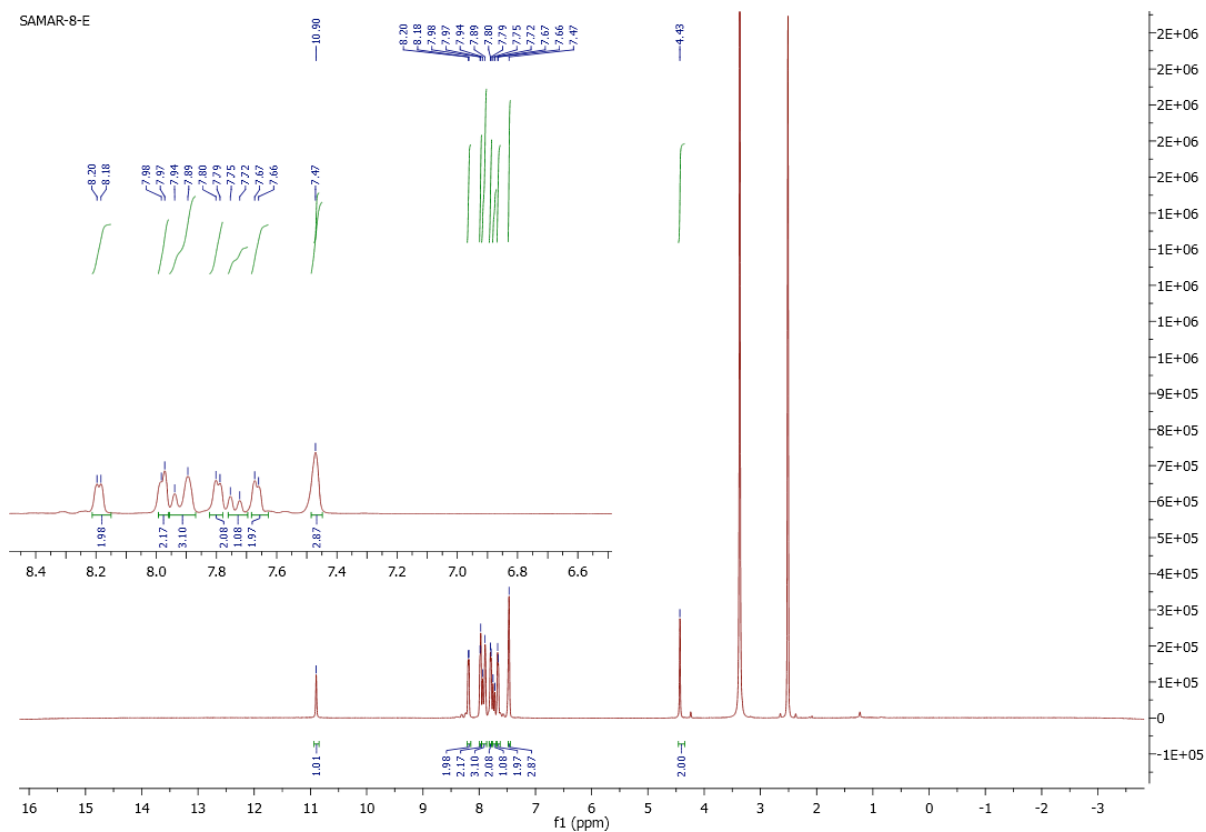

**Fig.9.**  $^1\text{H}$  NMR of compound **8e** (500 MHz,  $\text{DMSO}-d_6$ )

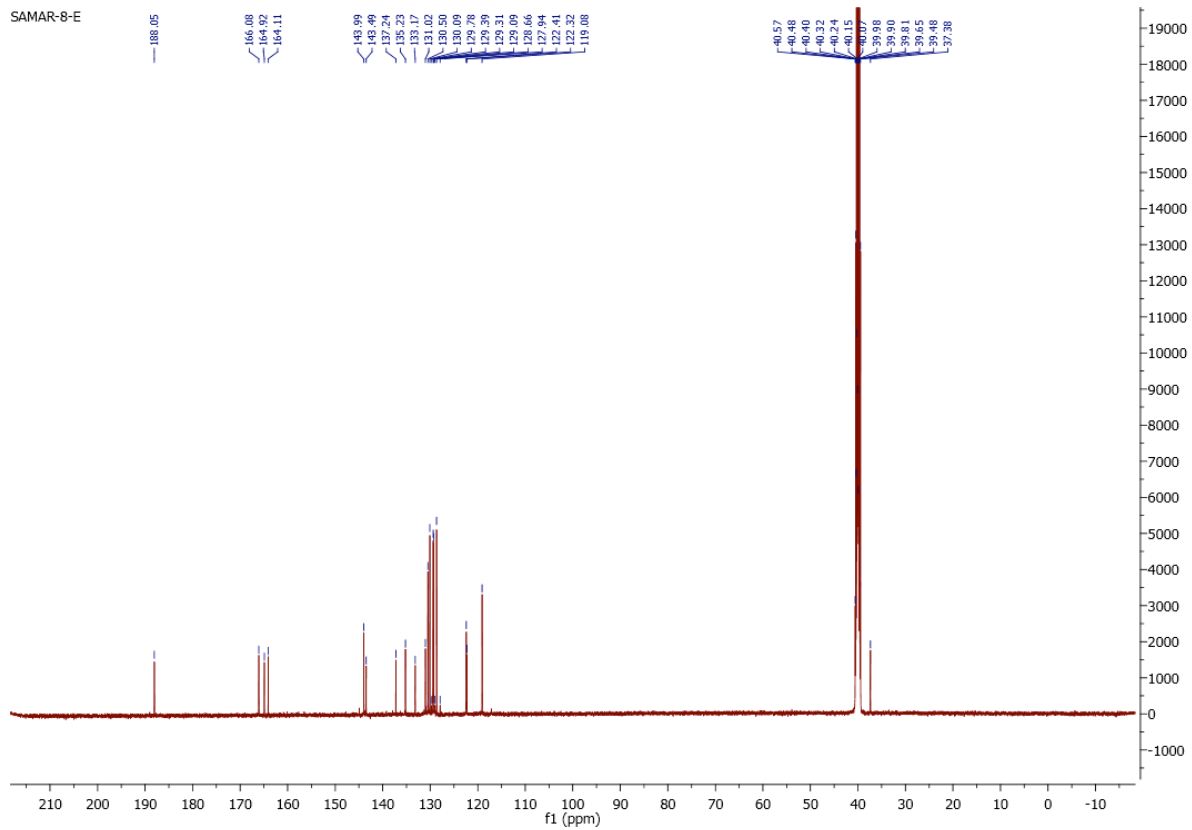

**Fig.10.**  $^{13}\text{C}$  NMR of compound 8e (125 MHz,  $\text{DMSO-}d_6$ )



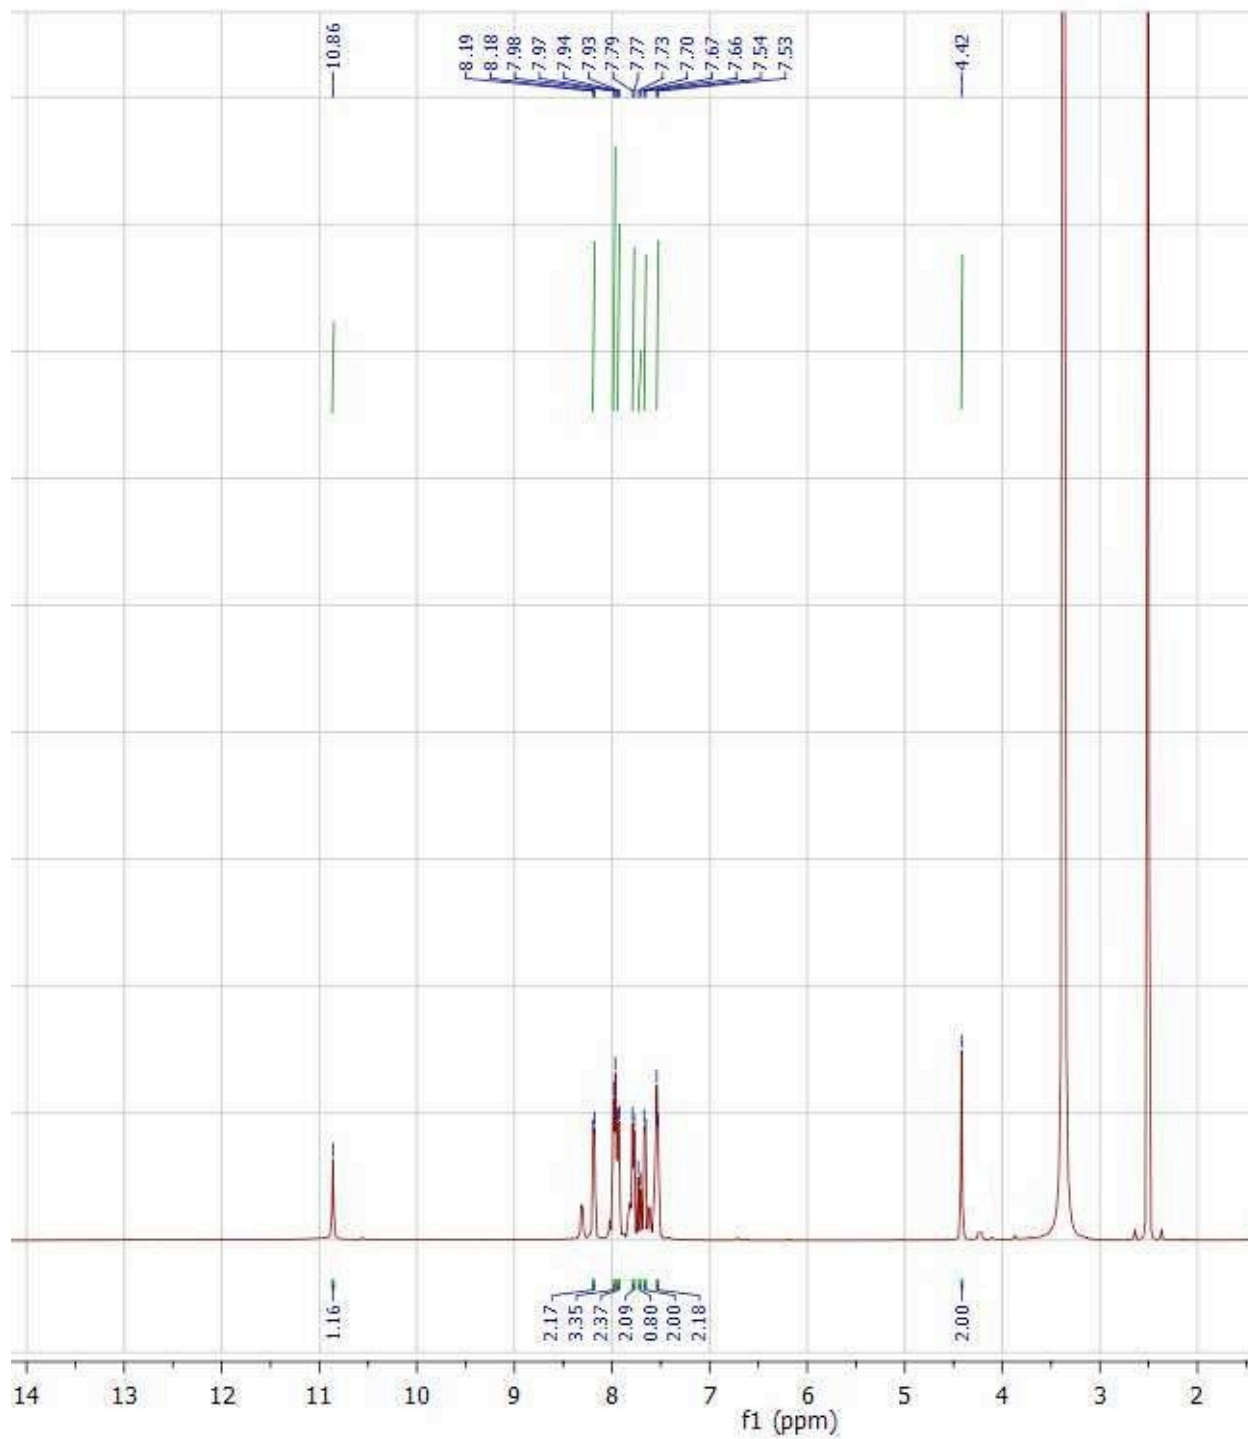

Fig.11. <sup>1</sup>H NMR of compound 8f (500 MHz, DMSO-*d*<sub>6</sub>)

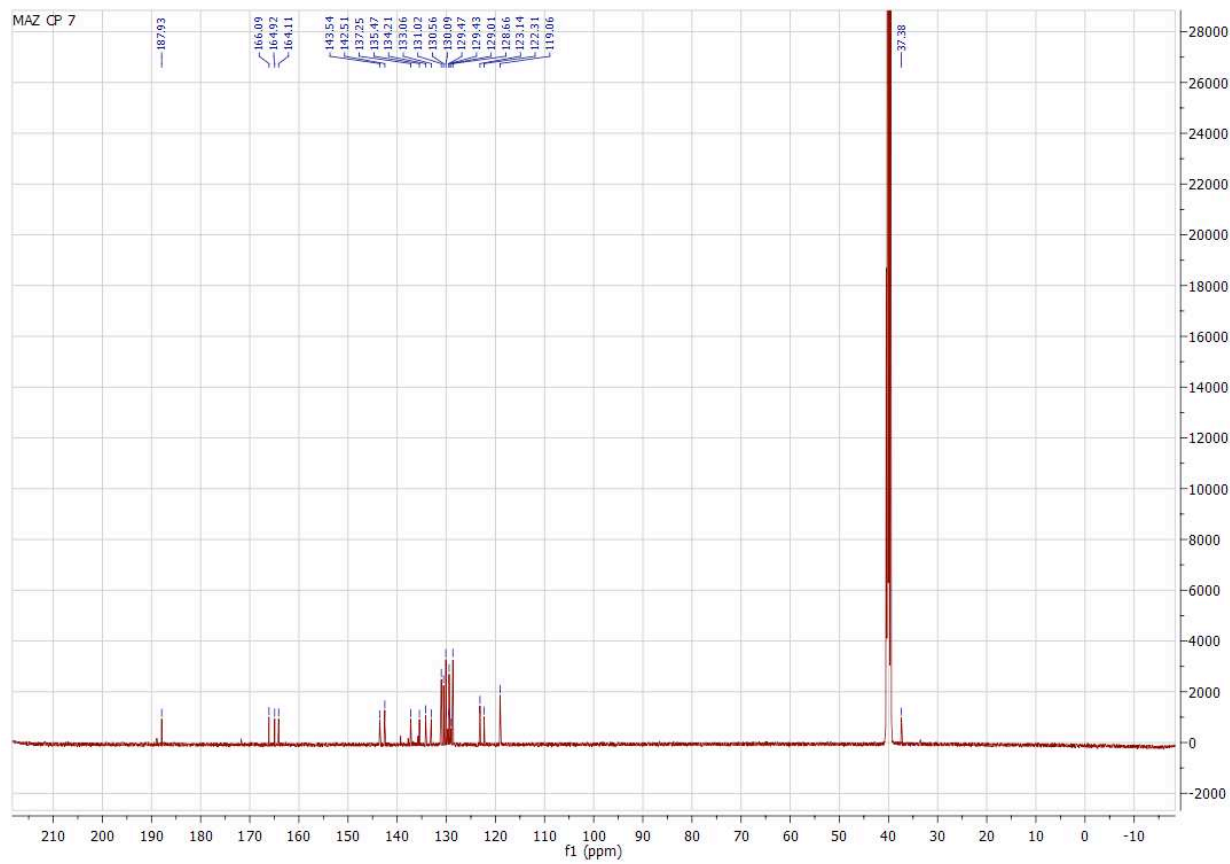

**Fig.12.**  $^{13}\text{C}$  NMR of compound 8f (125 MHz,  $\text{DMSO-}d_6$ )

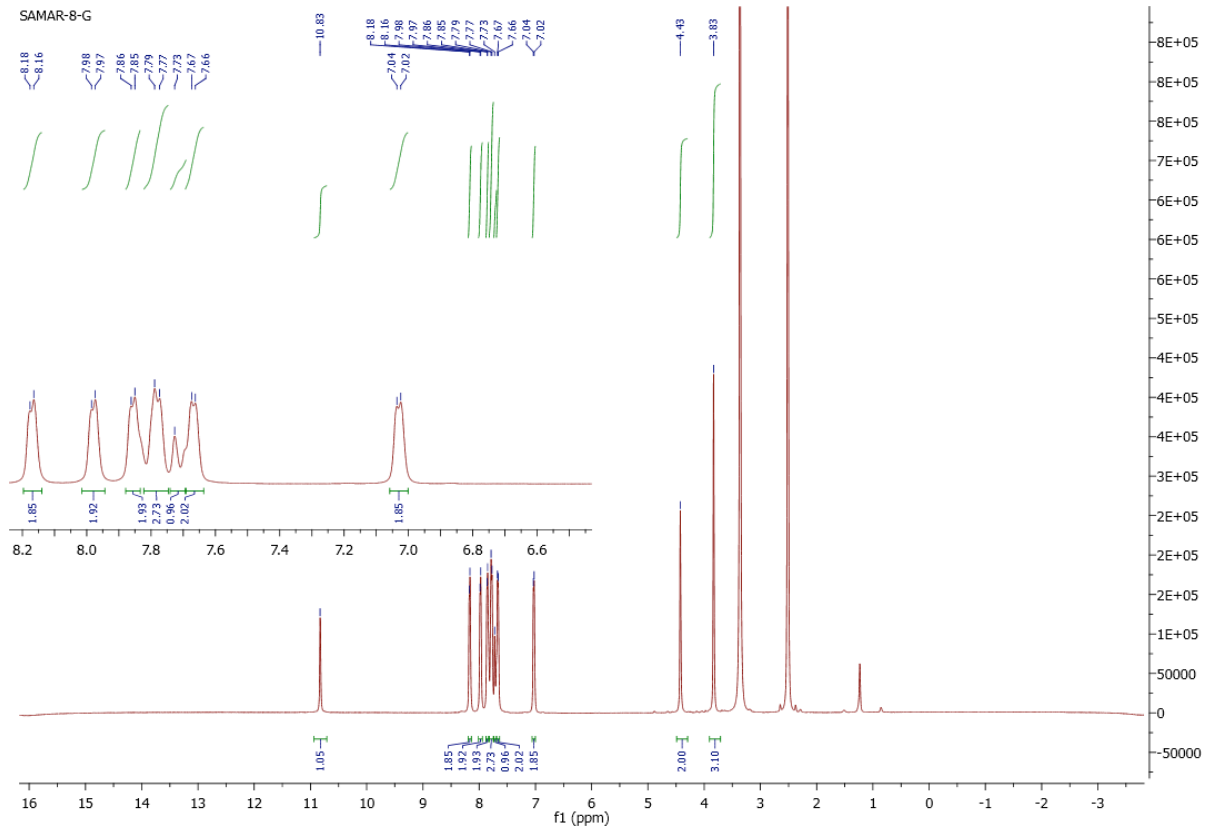

**Fig.13.**  $^1\text{H}$  NMR of compound 8g (500 MHz,  $\text{DMSO-}d_6$ )

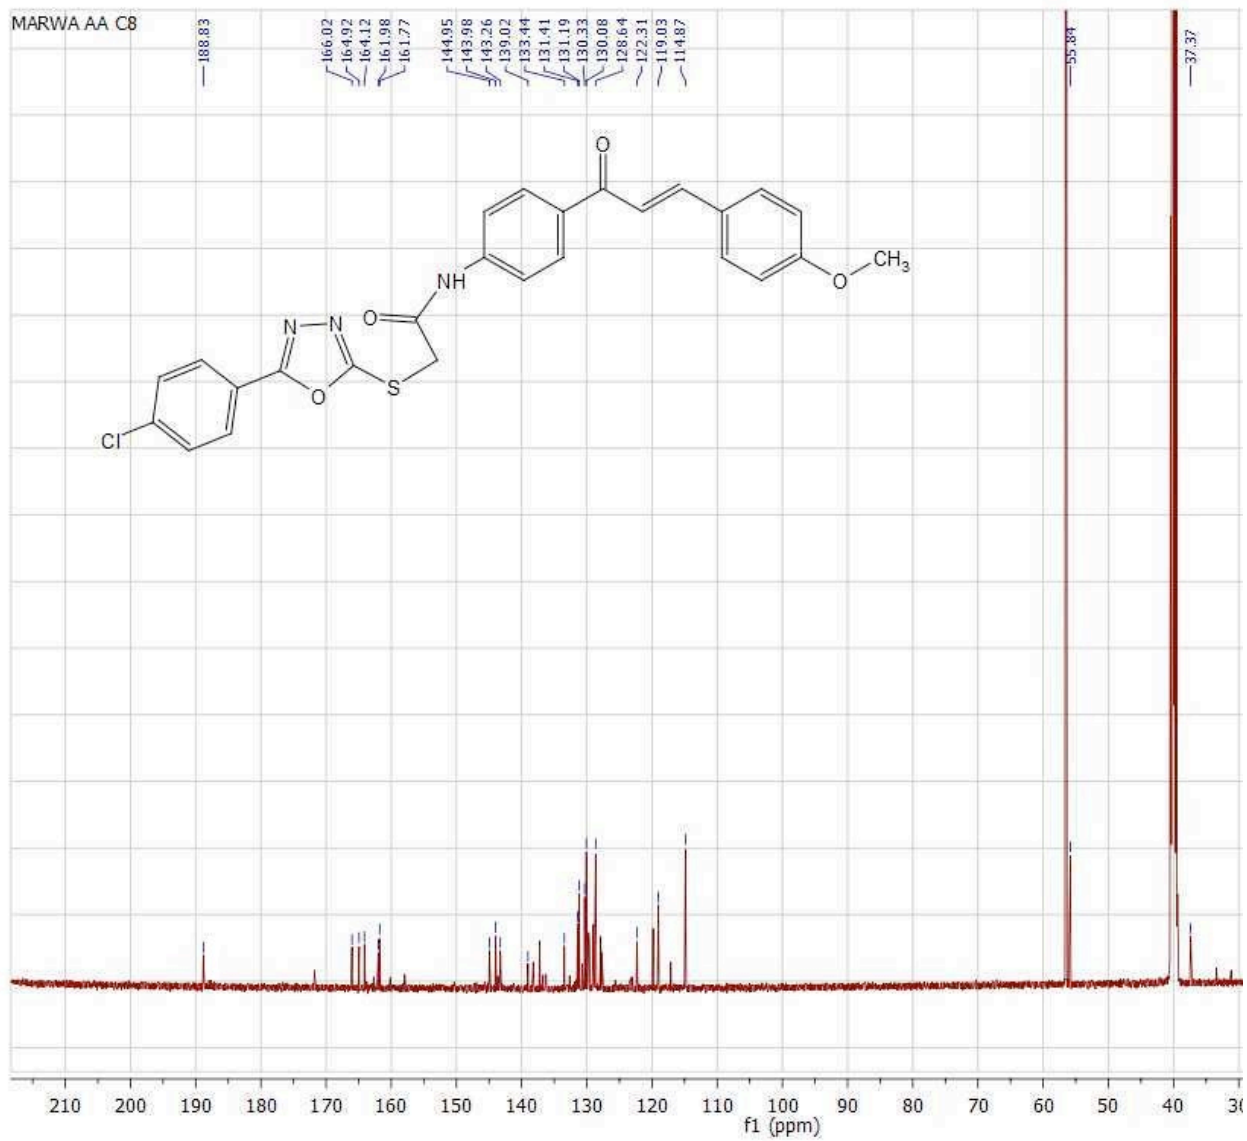

Fig.14.  $^{13}\text{C}$  NMR of compound 8g (125 MHz,  $\text{DMSO-}d_6$ )

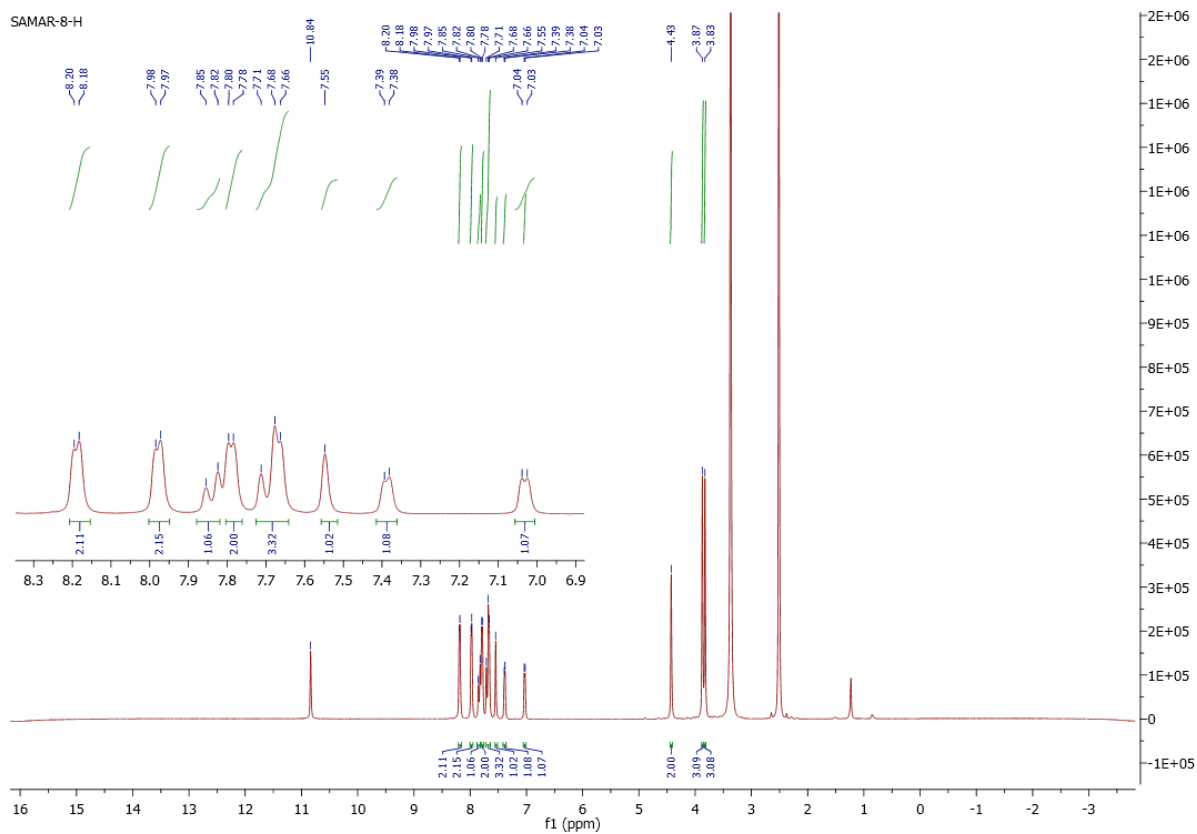

**Fig.15.**  $^1\text{H}$  NMR of compound 8h (500 MHz,  $\text{DMSO-}d_6$ )

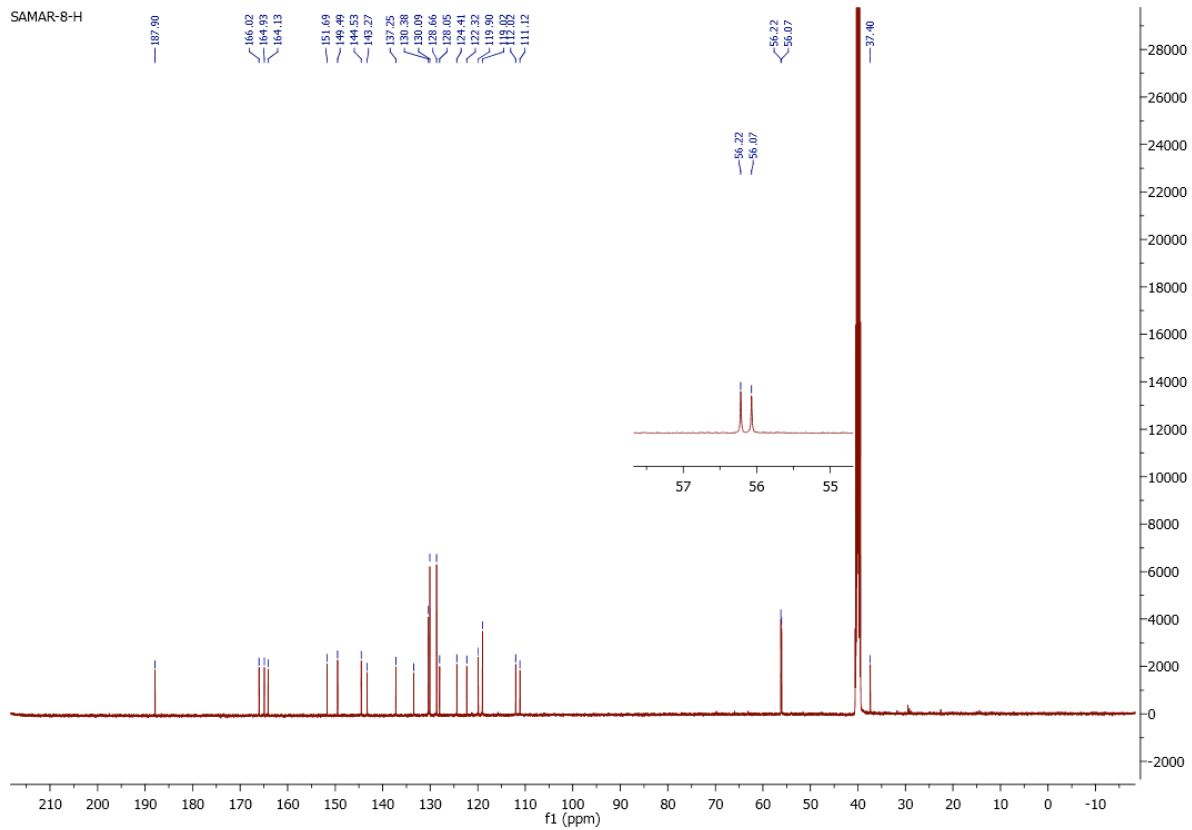

**Fig.16.**  $^{13}\text{C}$  NMR of compound 8h (125 MHz,  $\text{DMSO}-d_6$ ).

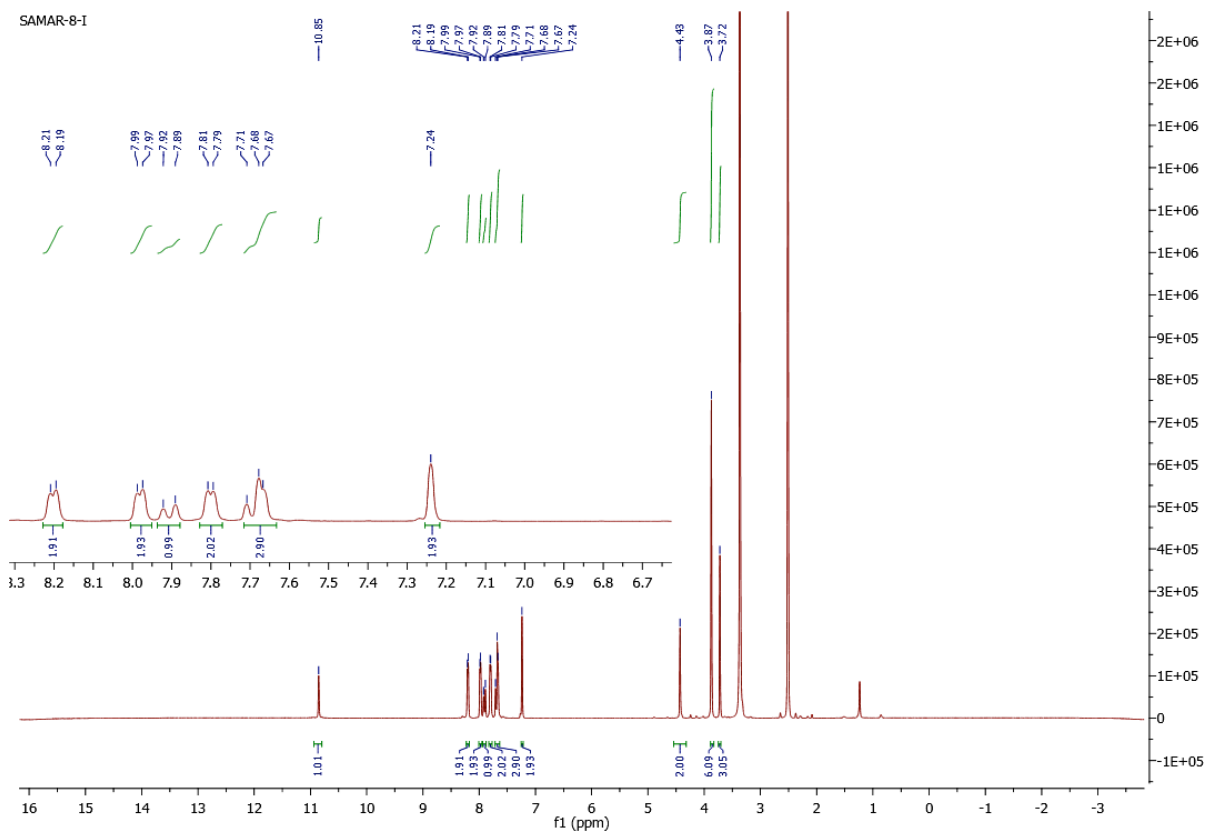

Fig.17.  $^1\text{H}$  NMR of compound 8i (500 MHz,  $\text{DMSO-d}_6$ )

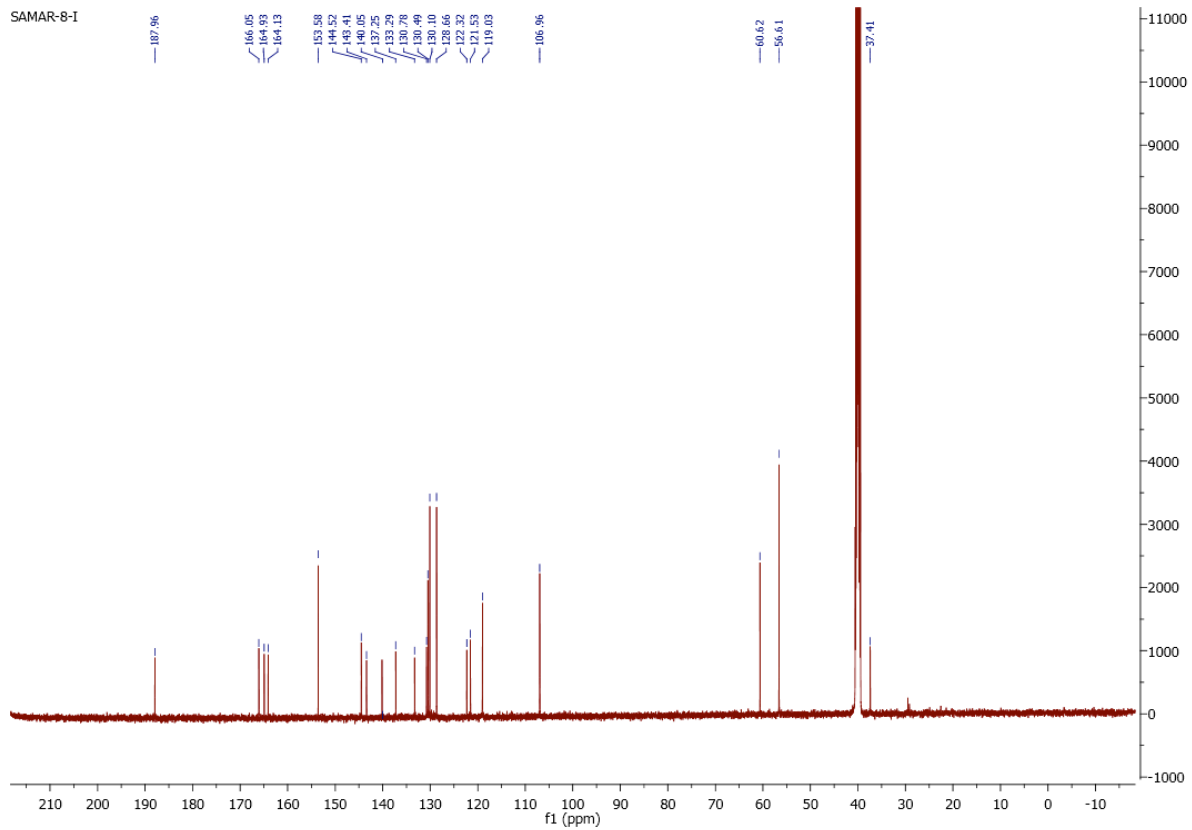

Fig.18.  $^{13}\text{C}$  NMR of compound 8i (125 MHz,  $\text{DMSO-}d_6$ ).



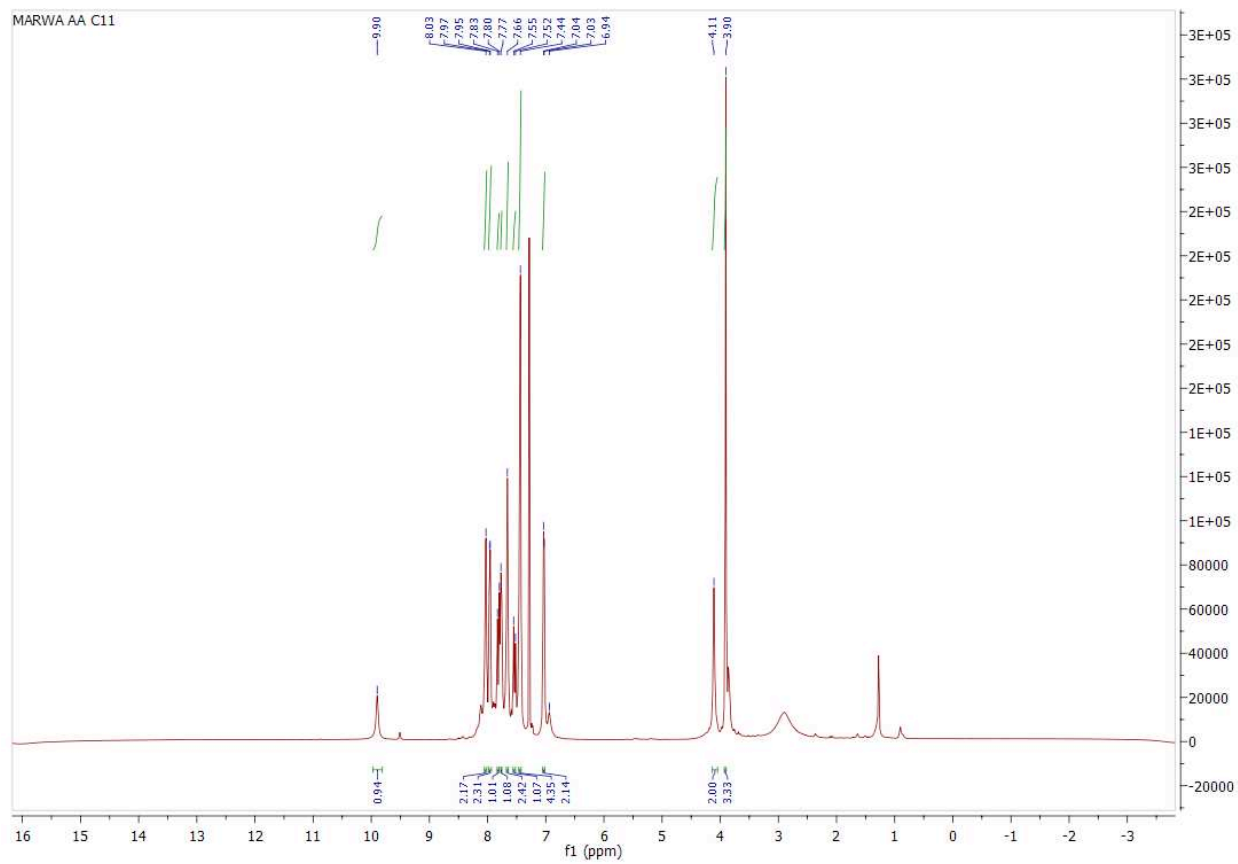

**Fig.19.**  $^1\text{H}$  NMR of compound 8j (500 MHz,  $\text{CDCl}_3$ )

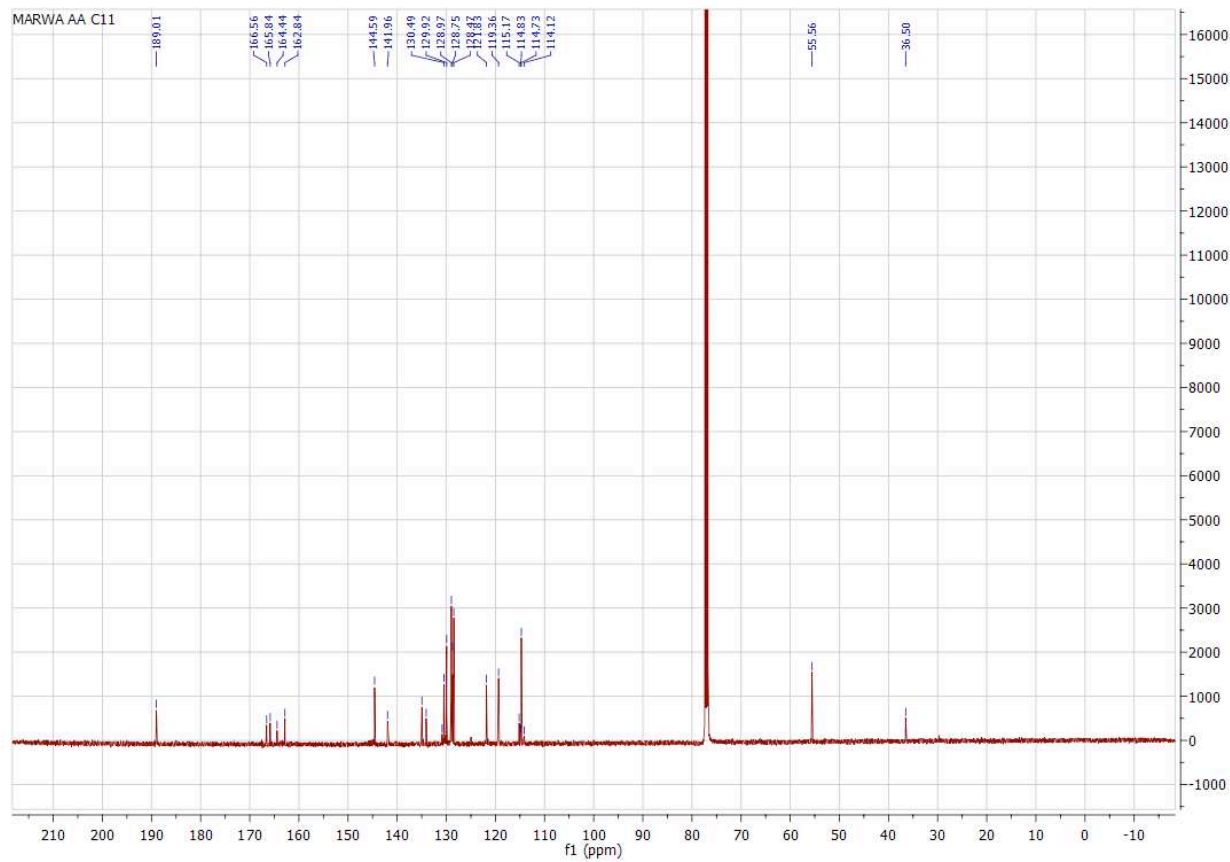

Fig.20.  $^{13}\text{C}$  NMR of compound 8j (125 MHz,  $\text{CDCl}_3$ )

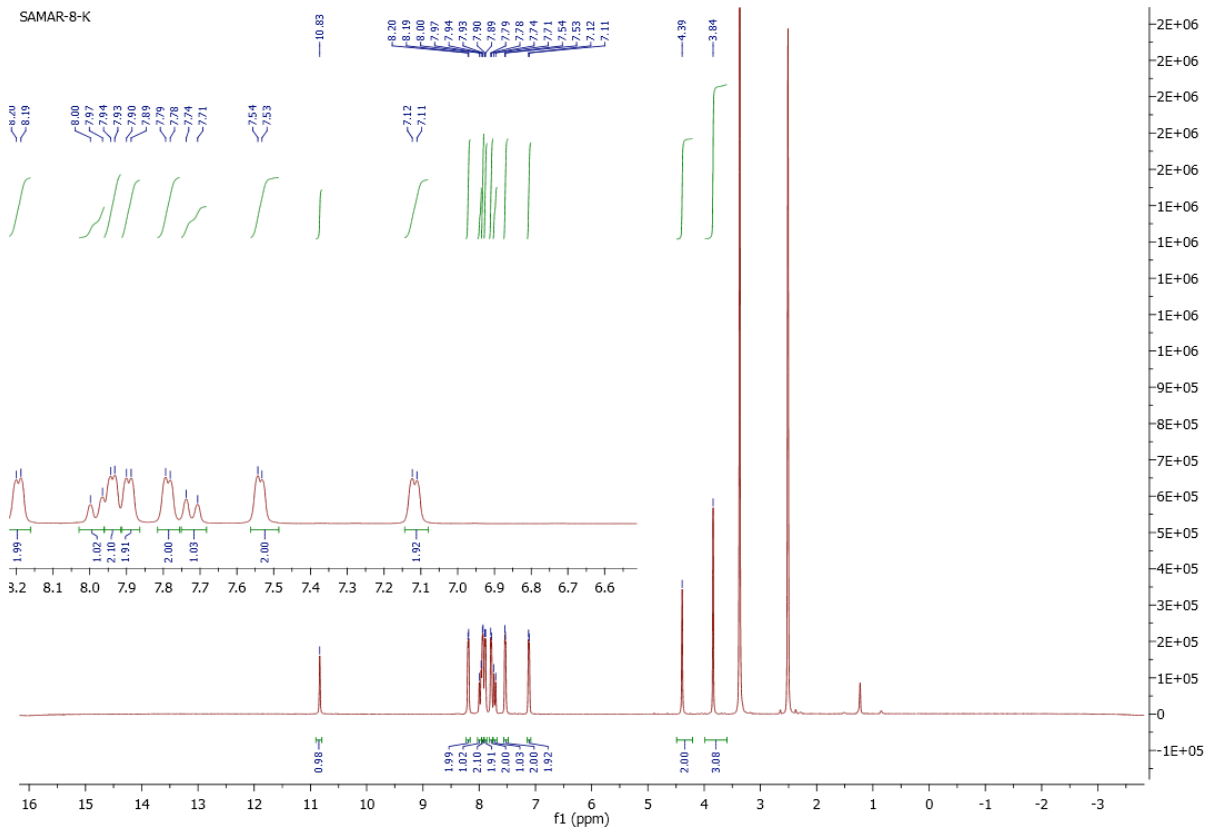

Fig.21.  $^1\text{H}$  NMR of compound 8k (500 MHz,  $\text{DMSO-}d_6$ )

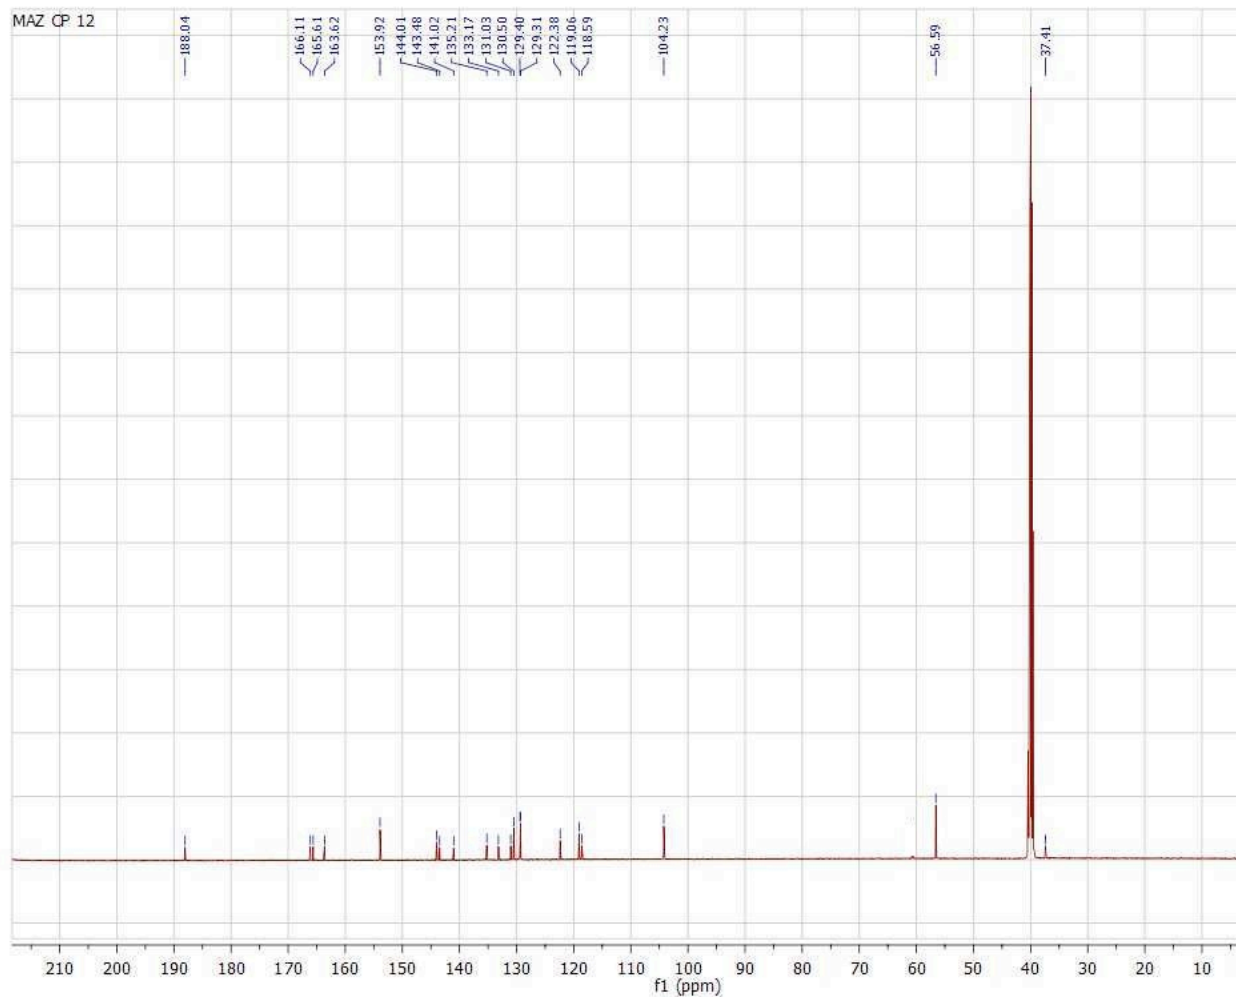

**Fig.22.**  $^{13}\text{C}$  NMR of compound 8k (125 MHz,  $\text{DMSO-}d_6$ )

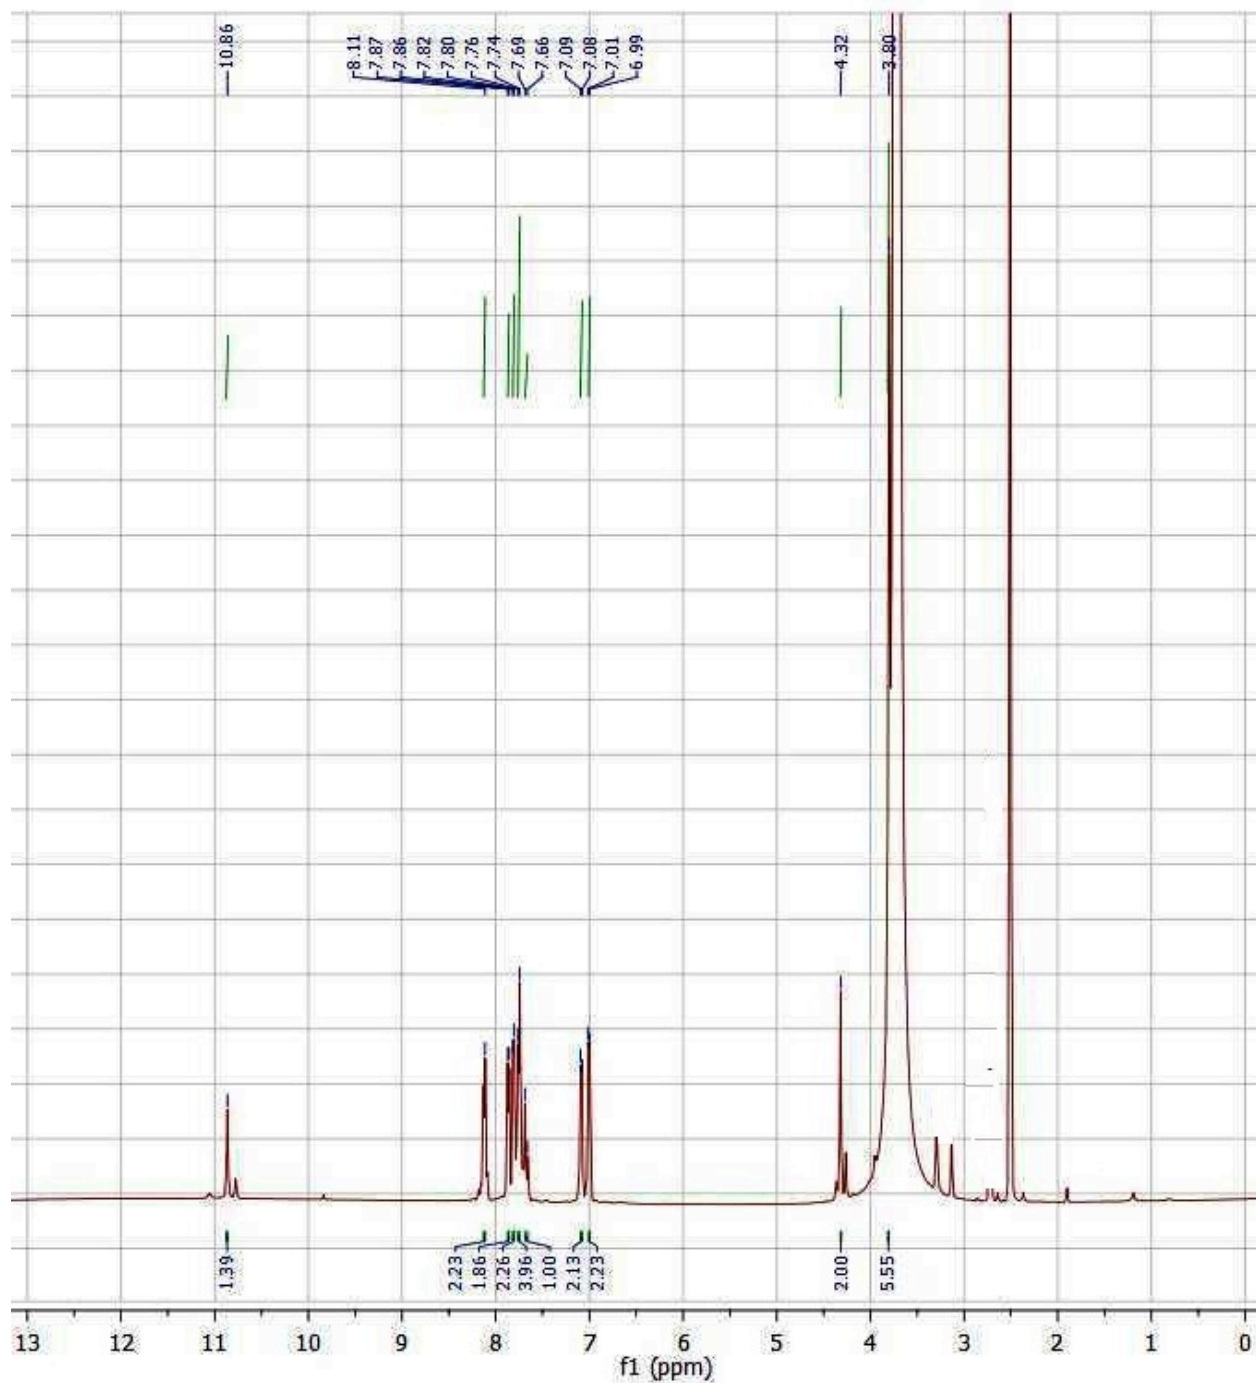

Fig.23. <sup>1</sup>H NMR of compound 8l (500 MHz, DMSO-*d*<sub>6</sub>)

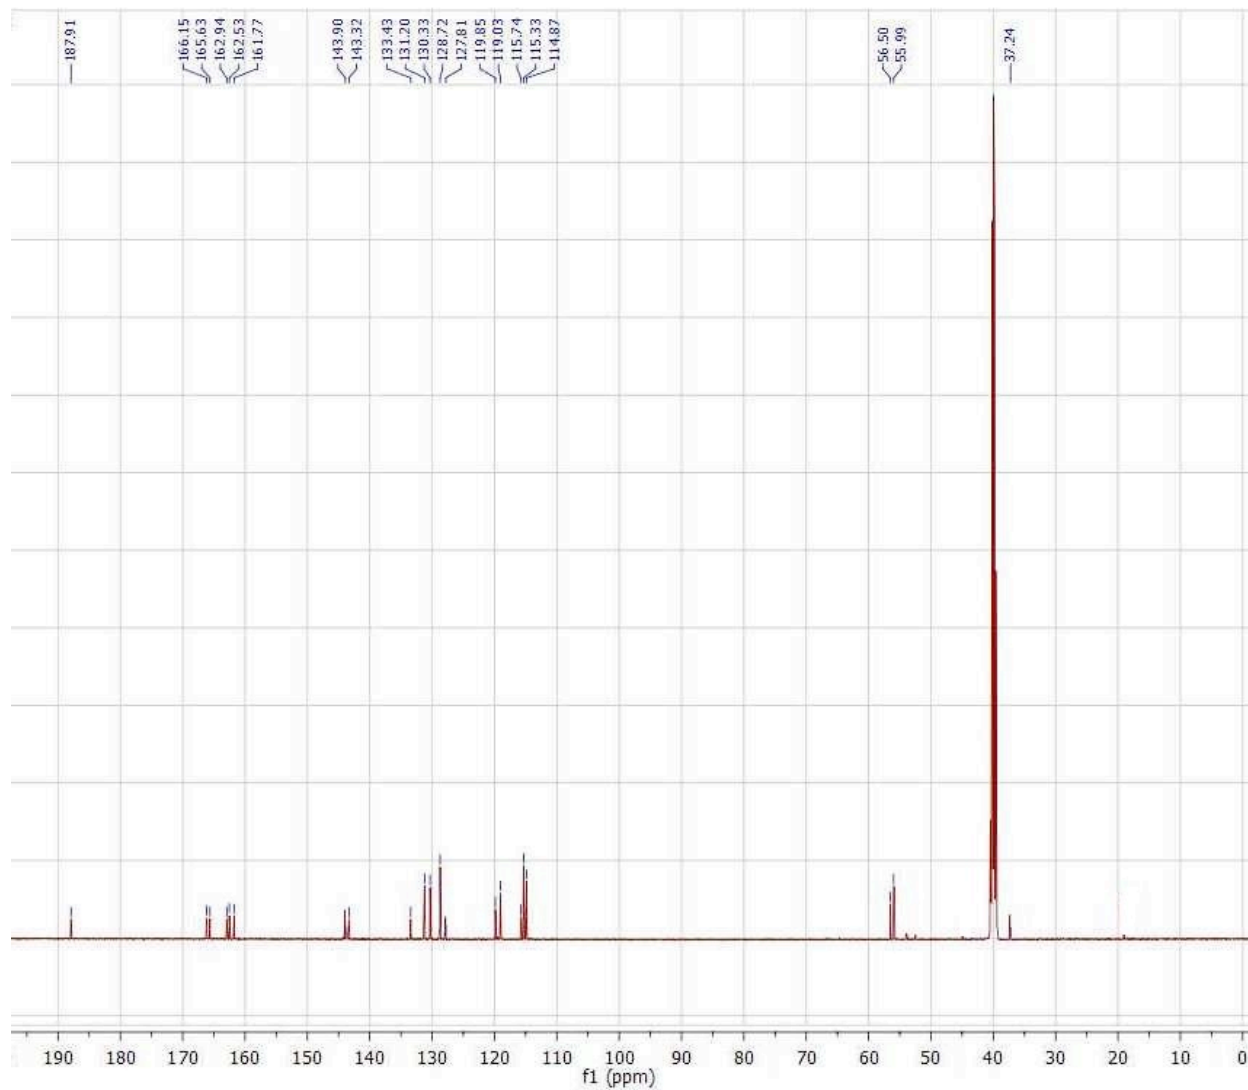

**Fig.24.**  $^{13}\text{C}$  NMR of compound 8l (125 MHz,  $\text{DMSO-}d_6$ )

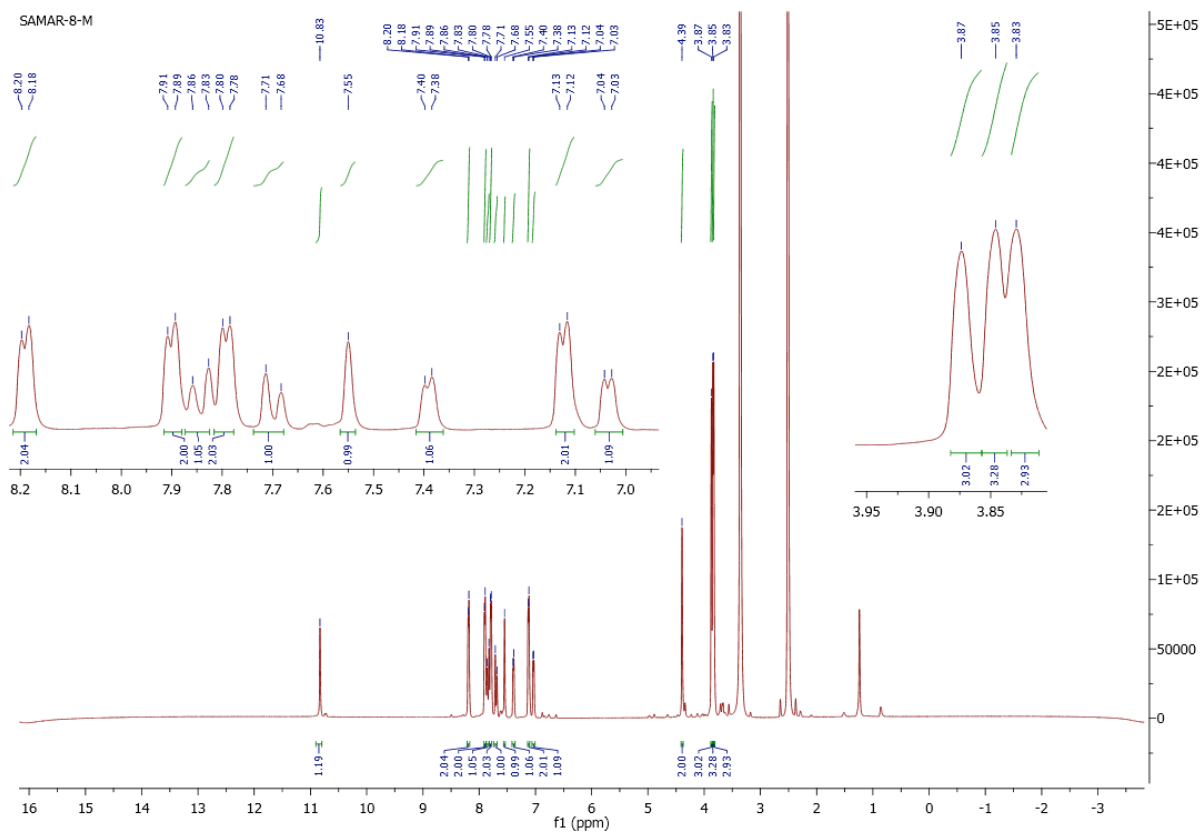

Fig.25.  $^1\text{H}$  NMR of compound 8m (500 MHz,  $\text{DMSO}-d_6$ ).

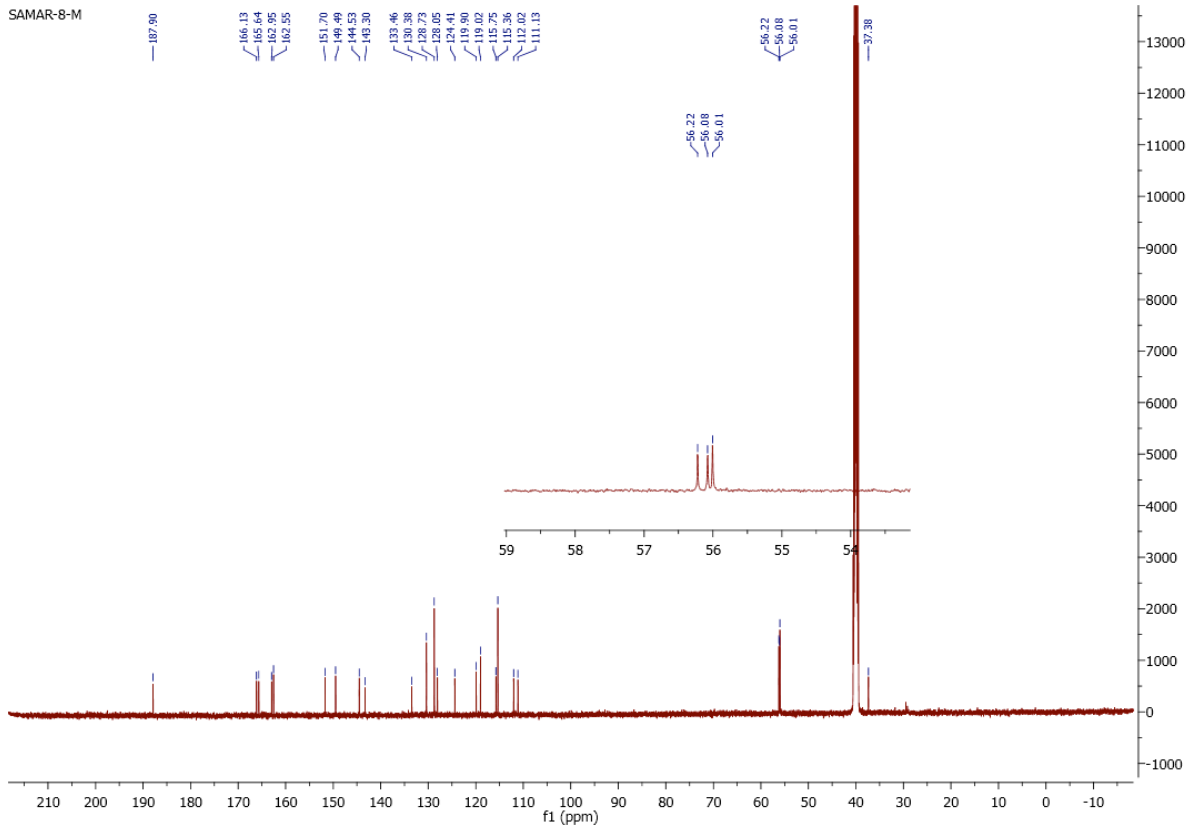

Fig.26.  $^{13}\text{C}$  NMR of compound 8m (125 MHz,  $\text{DMSO-}d_6$ ).



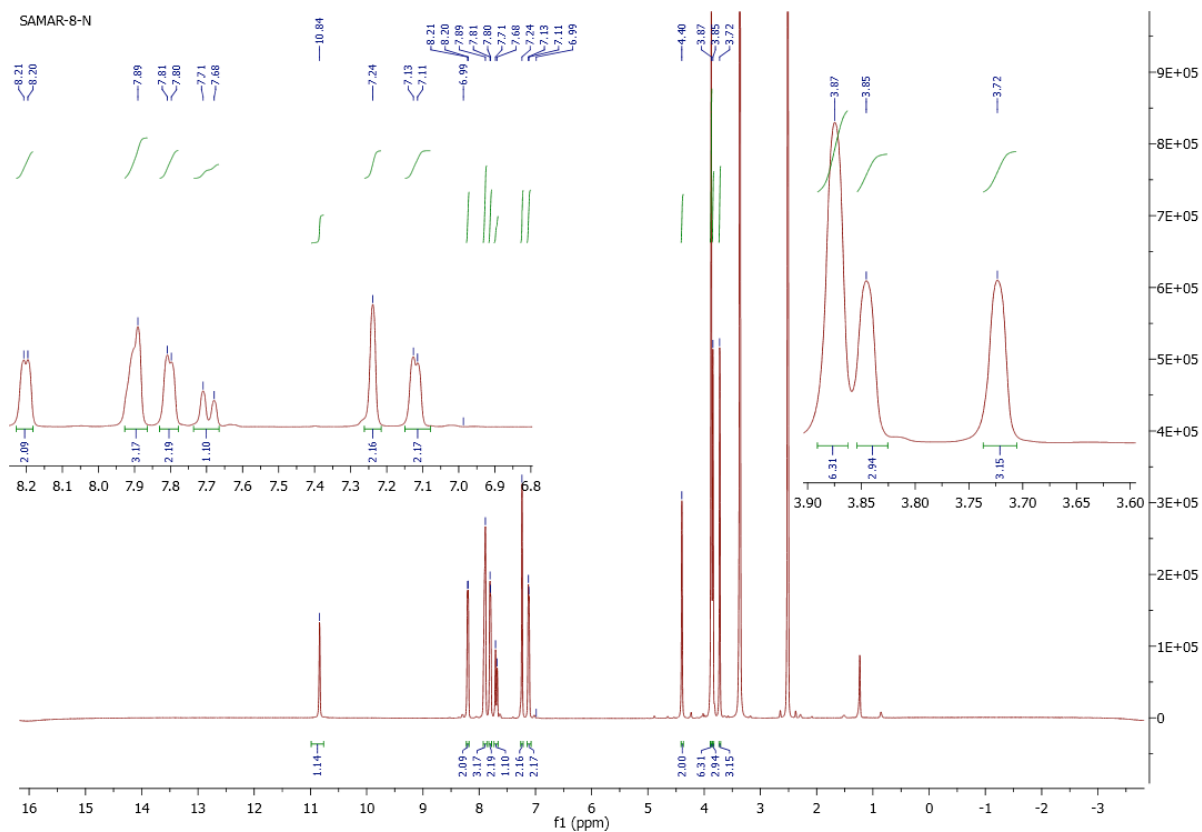

**Fig.27.**  $^1\text{H}$  NMR of compound 8n (500 MHz,  $\text{DMSO-}d_6$ ).

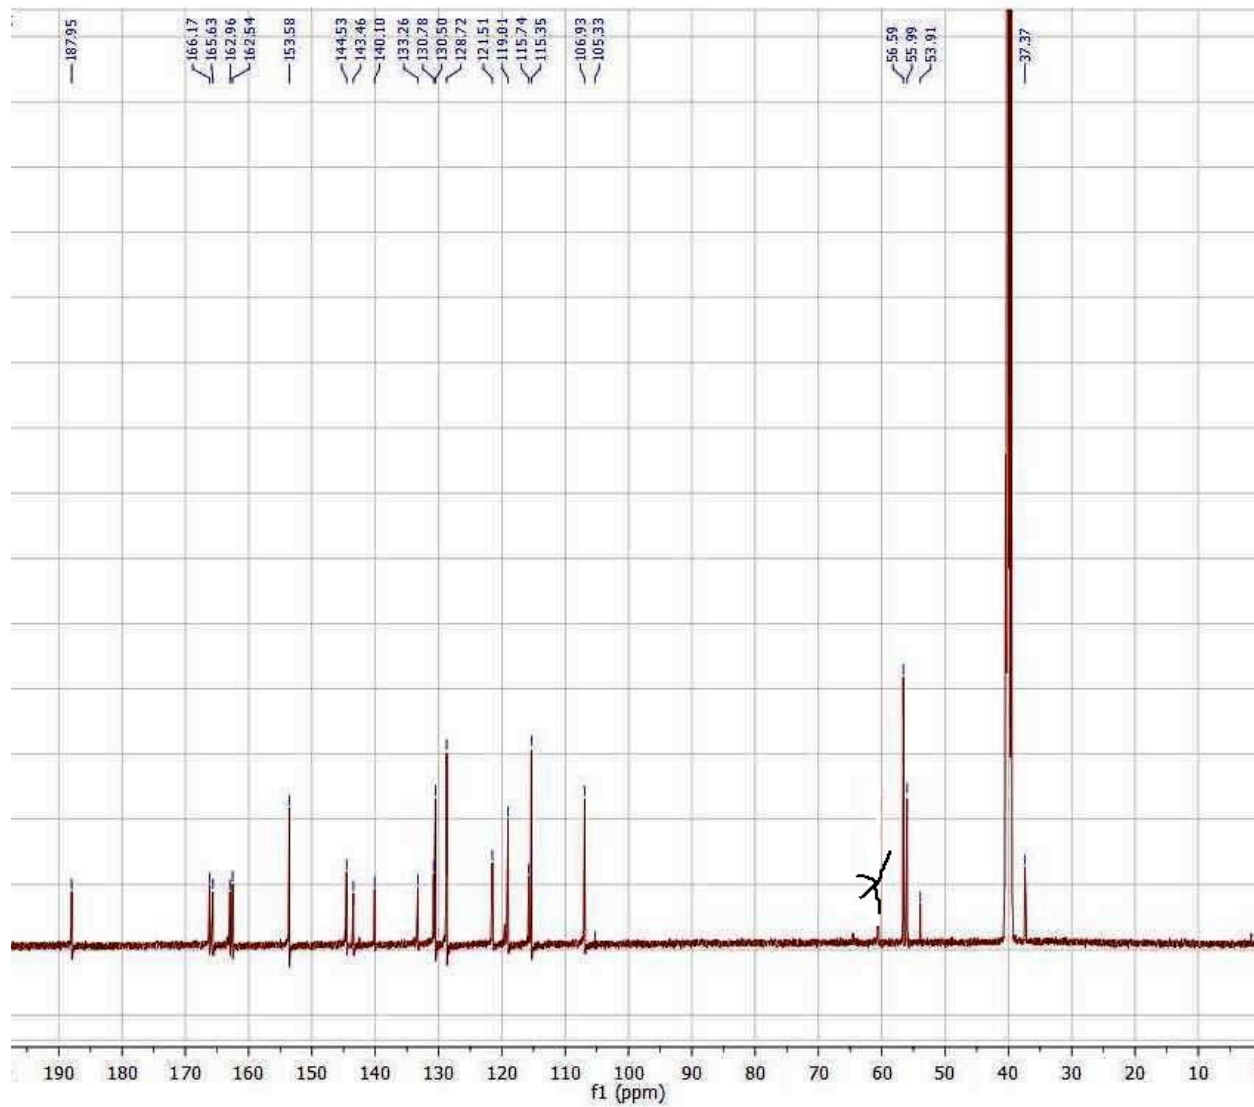

**Fig.28.**  $^{13}\text{C}$  NMR of compound 8n (125 MHz,  $\text{DMSO-}d_6$ )

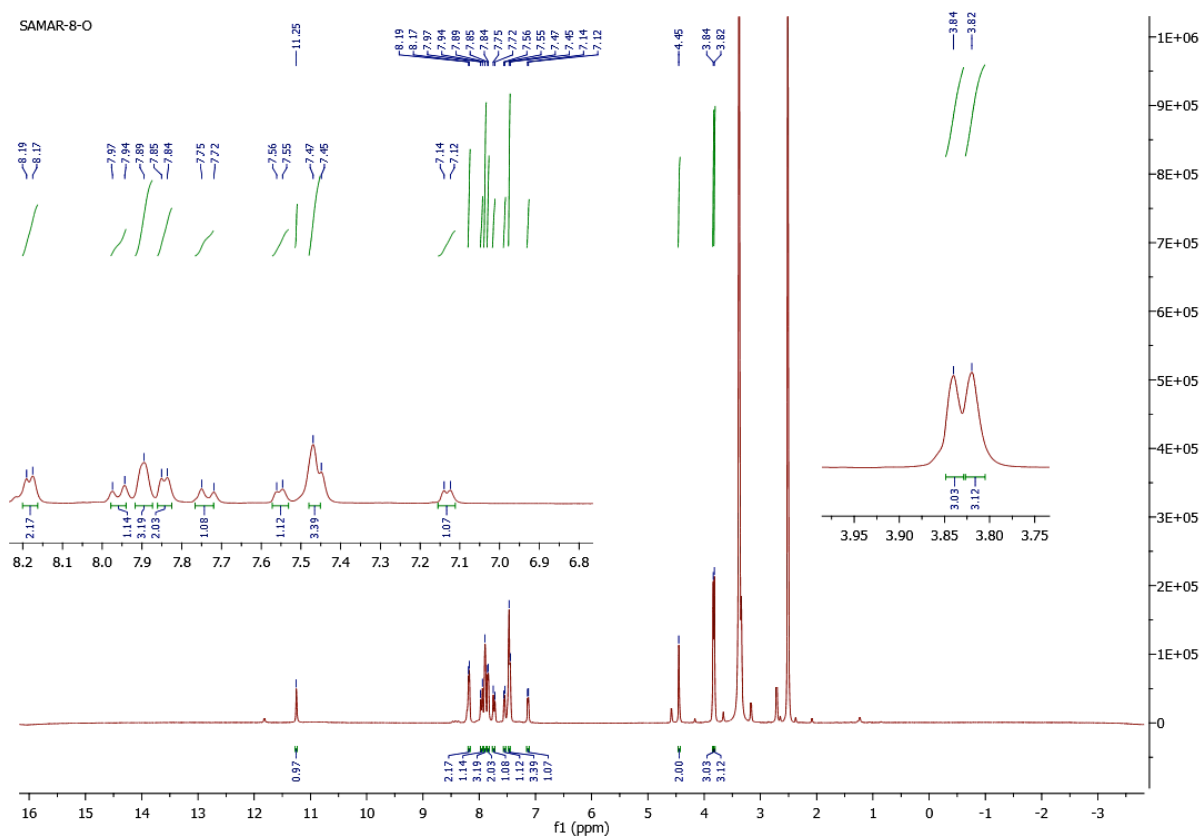

**Fig.29.**  $^1\text{H}$  NMR of compound 8o (500 MHz,  $\text{DMSO-}d_6$ ).

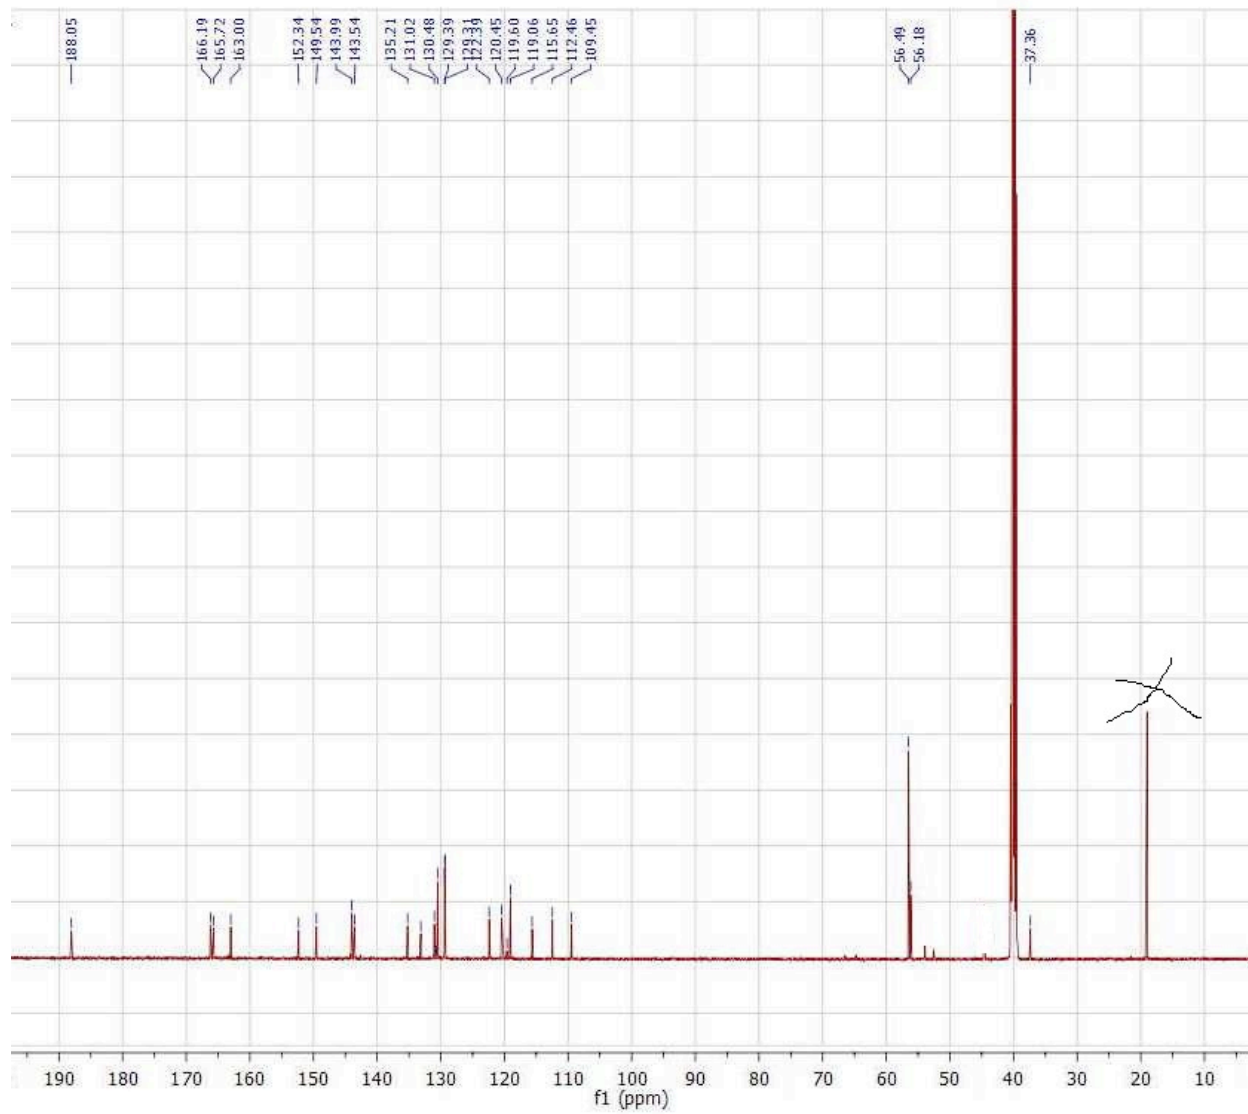

**Fig.30.**  $^{13}\text{C}$  NMR of compound 8o (125 MHz,  $\text{DMSO-}d_6$ )

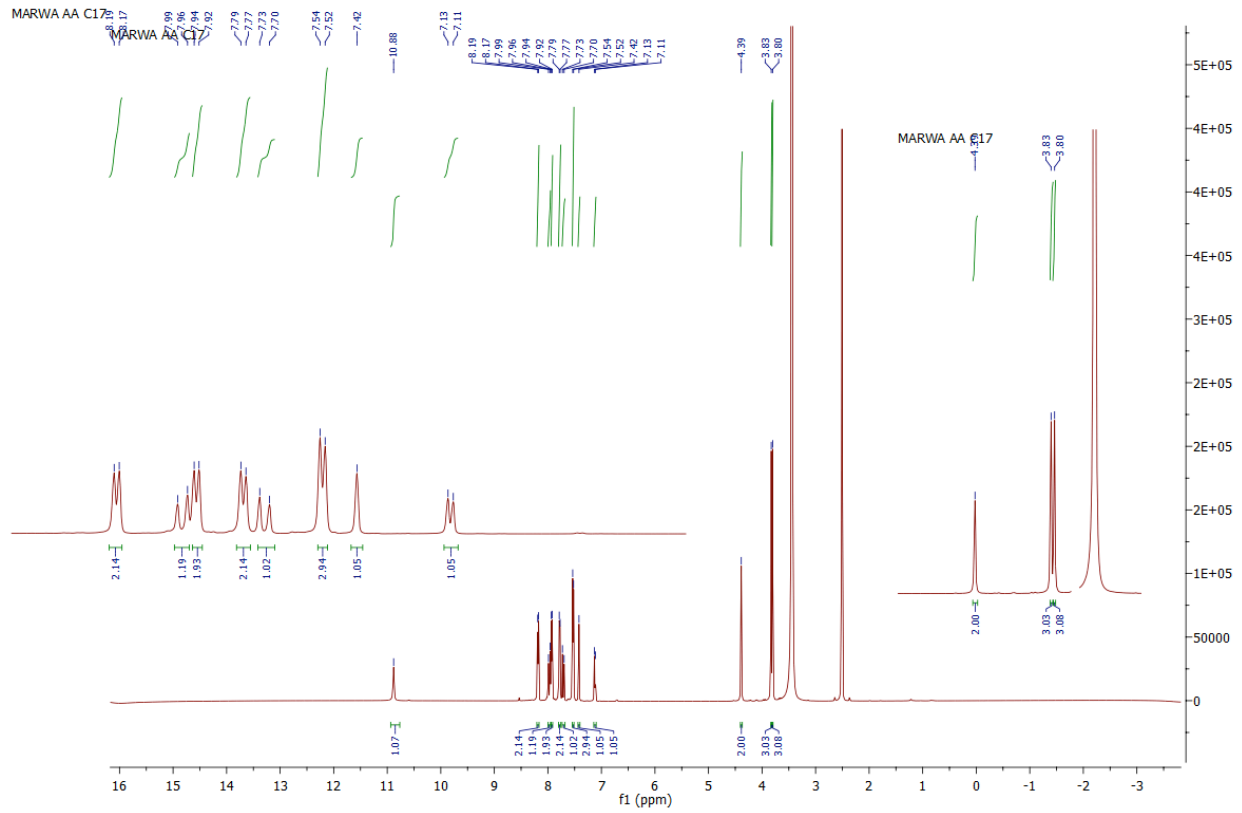

**Fig.31.**  $^1\text{H}$  NMR of compound 8p (500 MHz,  $\text{DMSO-}d_6$ )

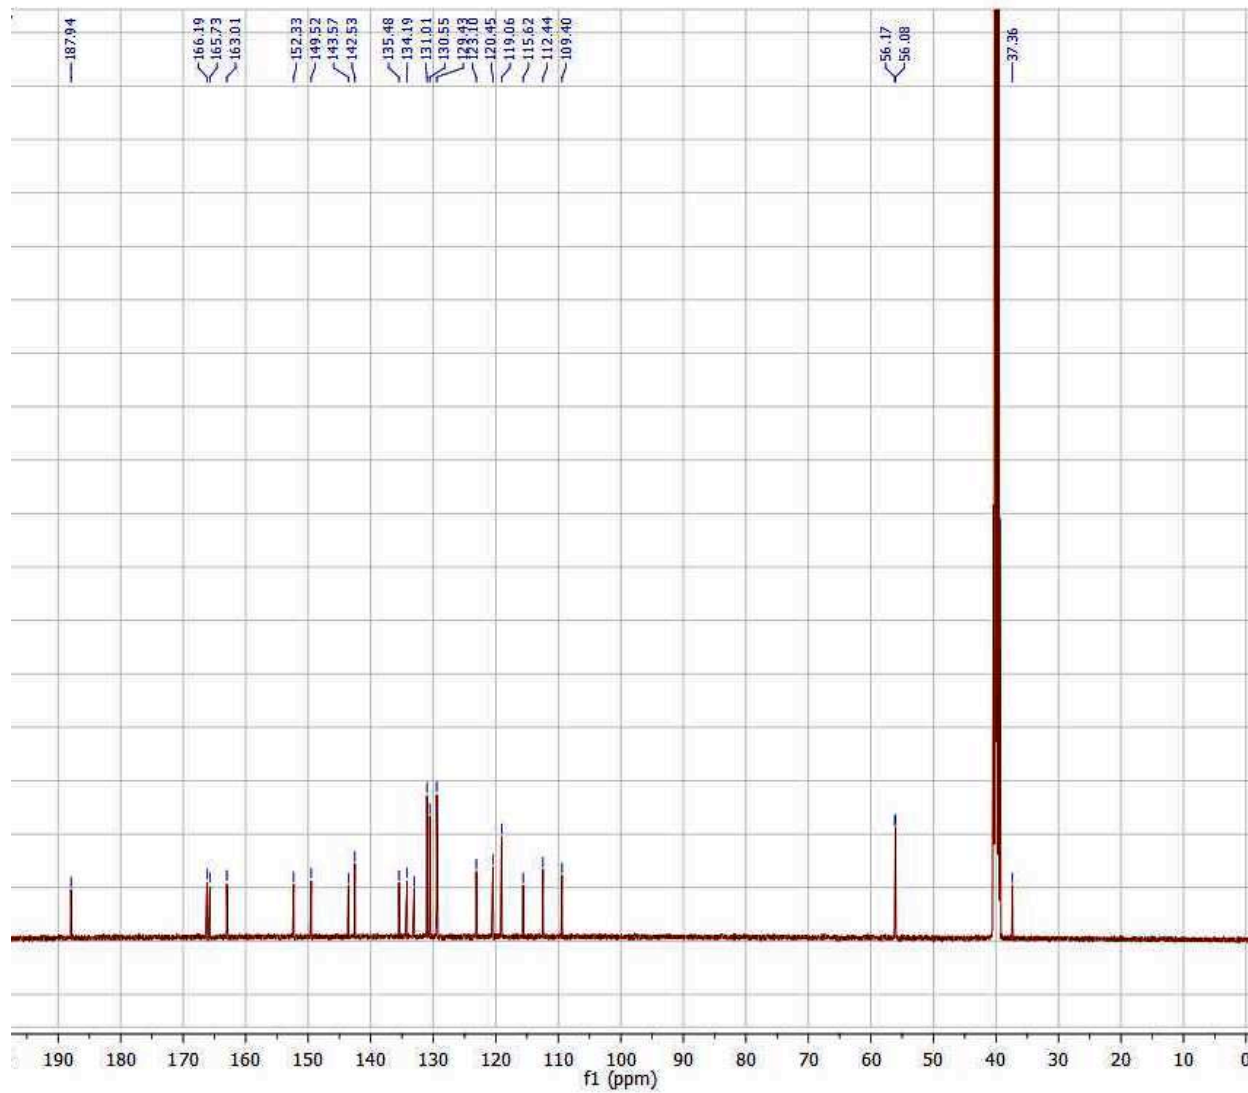

**Fig.32.**  $^{13}\text{C}$  NMR of compound 8p (125 MHz,  $\text{DMSO-}d_6$ )

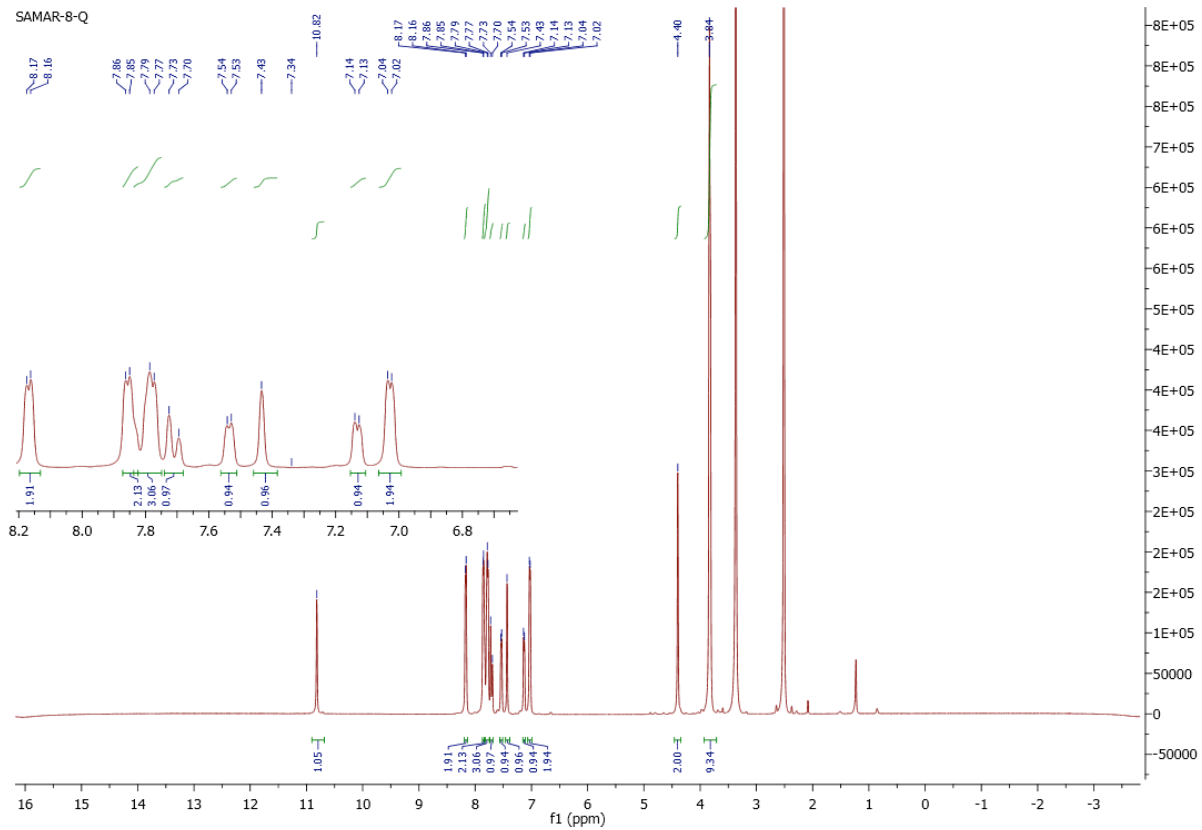

**Fig.33.**  $^1\text{H}$  NMR of compound 8q (500 MHz,  $\text{DMSO-}d_6$ )

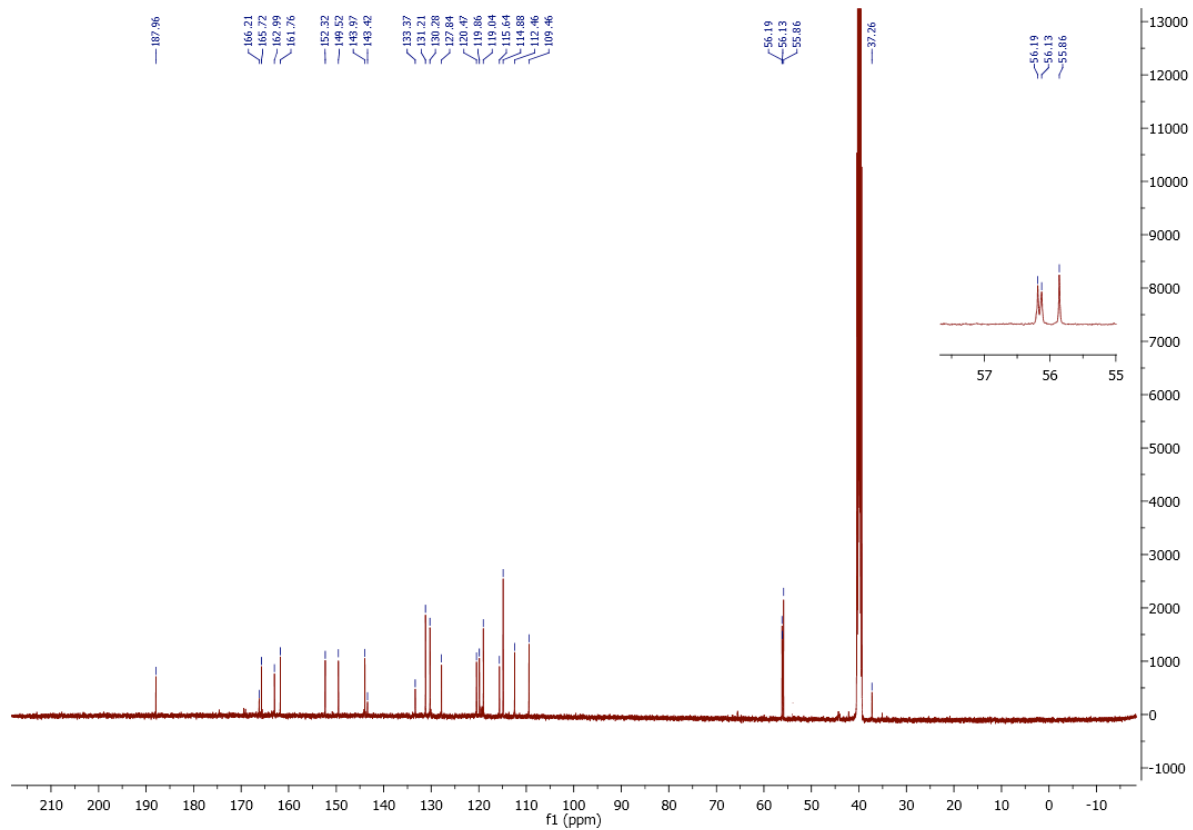

Fig.34.  $^{13}\text{C}$  NMR of compound 8q (125 MHz,  $\text{DMSO-}d_6$ )



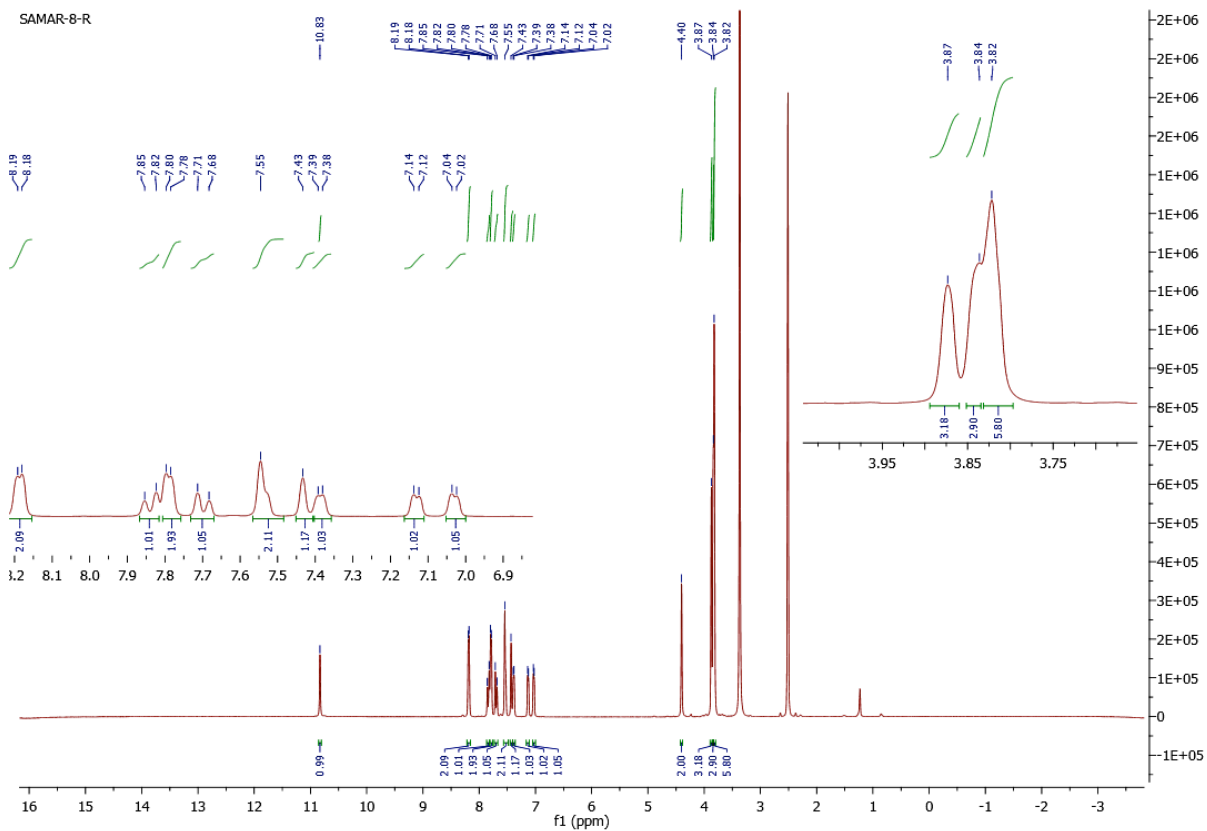

Fig.35.  $^1\text{H}$  NMR of compound 8r (500 MHz,  $\text{DMSO-}d_6$ )

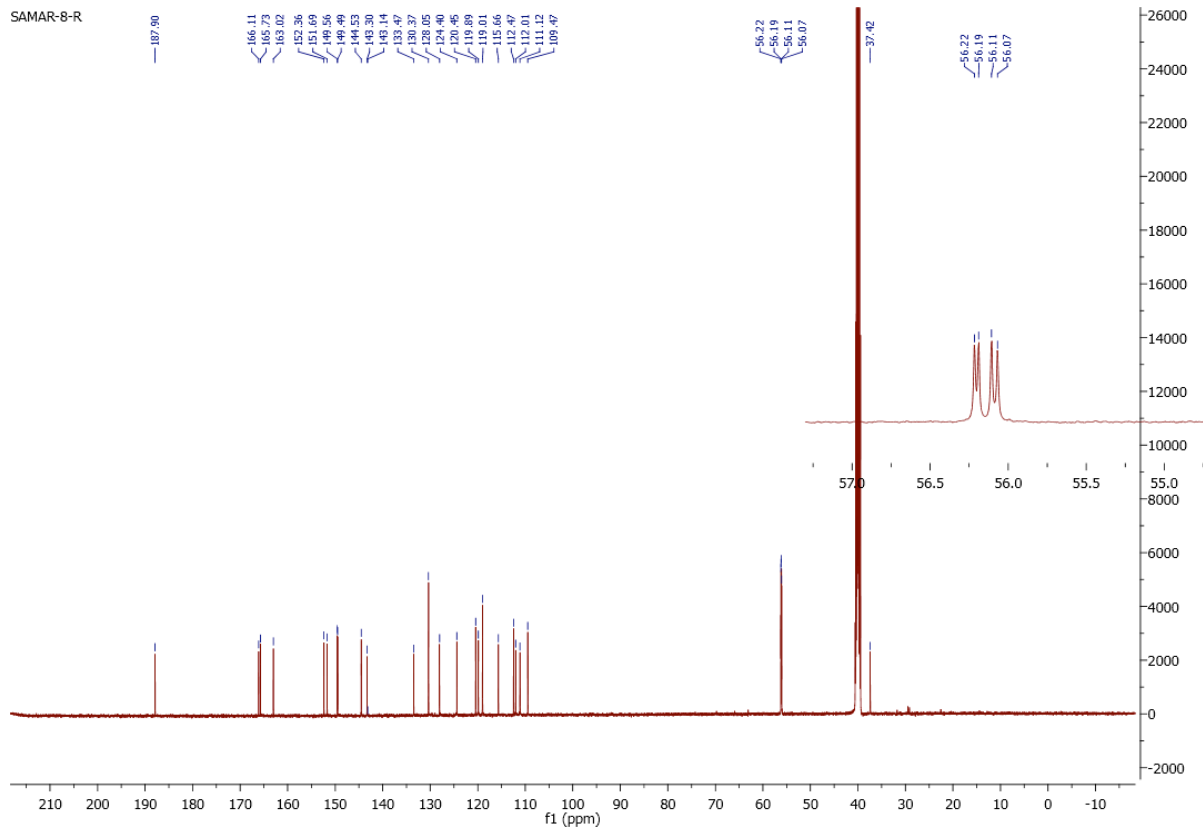

Fig.36.  $^{13}\text{C}$  NMR of compound 8r (125 MHz,  $\text{DMSO-}d_6$ )

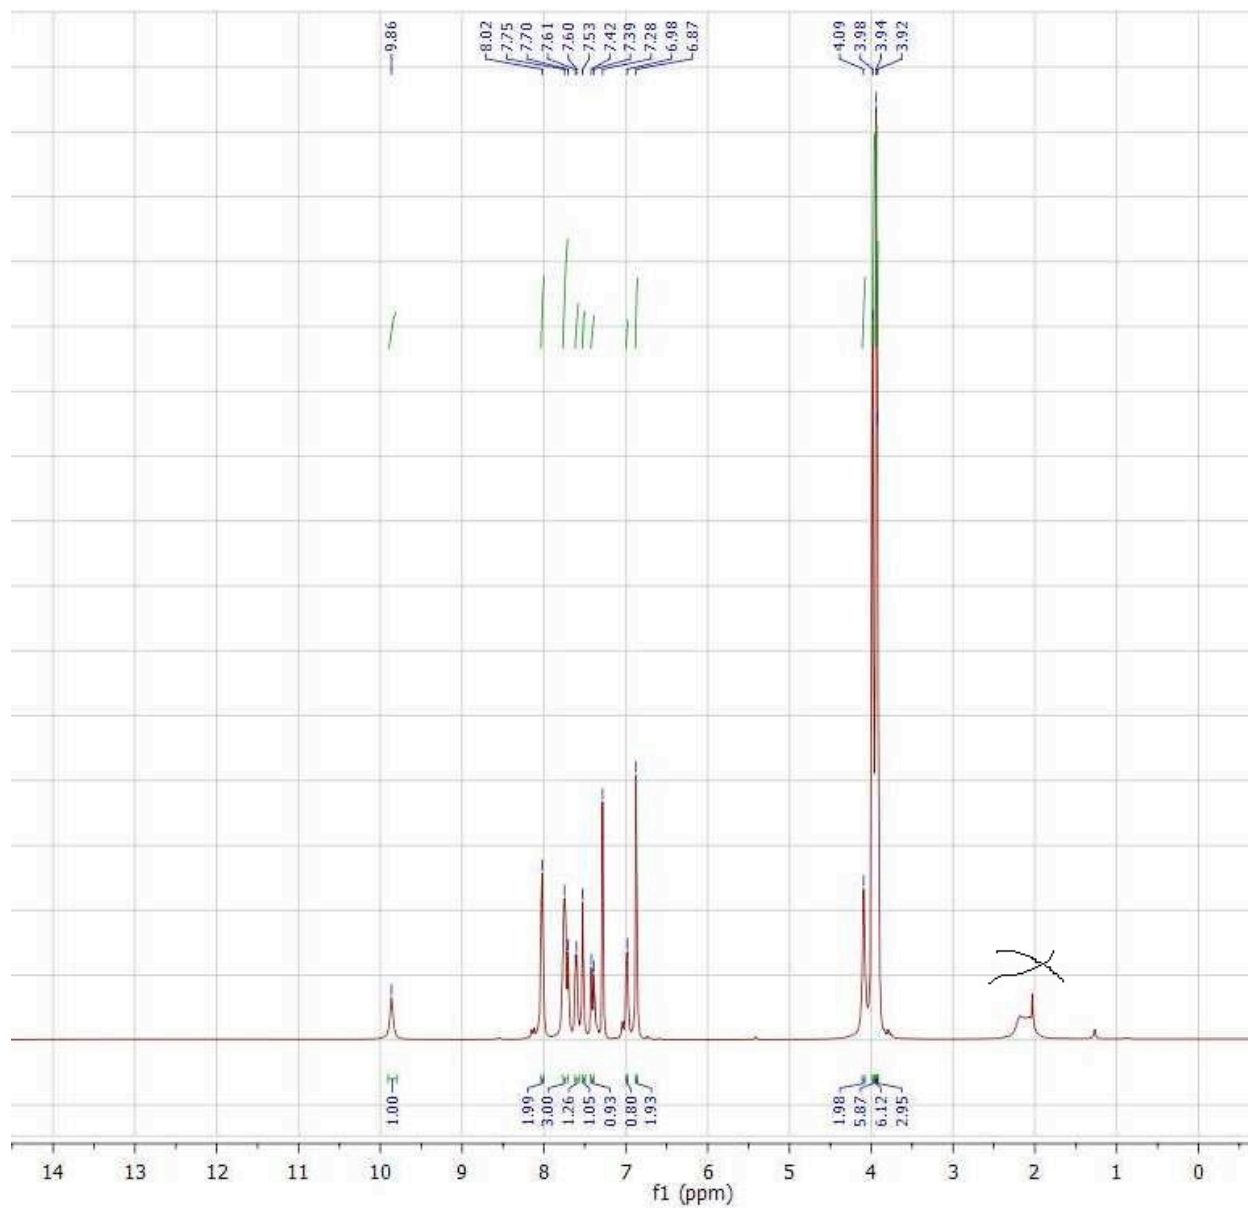

Fig.37.  $^1\text{H}$  NMR of compound 8s (500 MHz,  $\text{CDCl}_3$ )

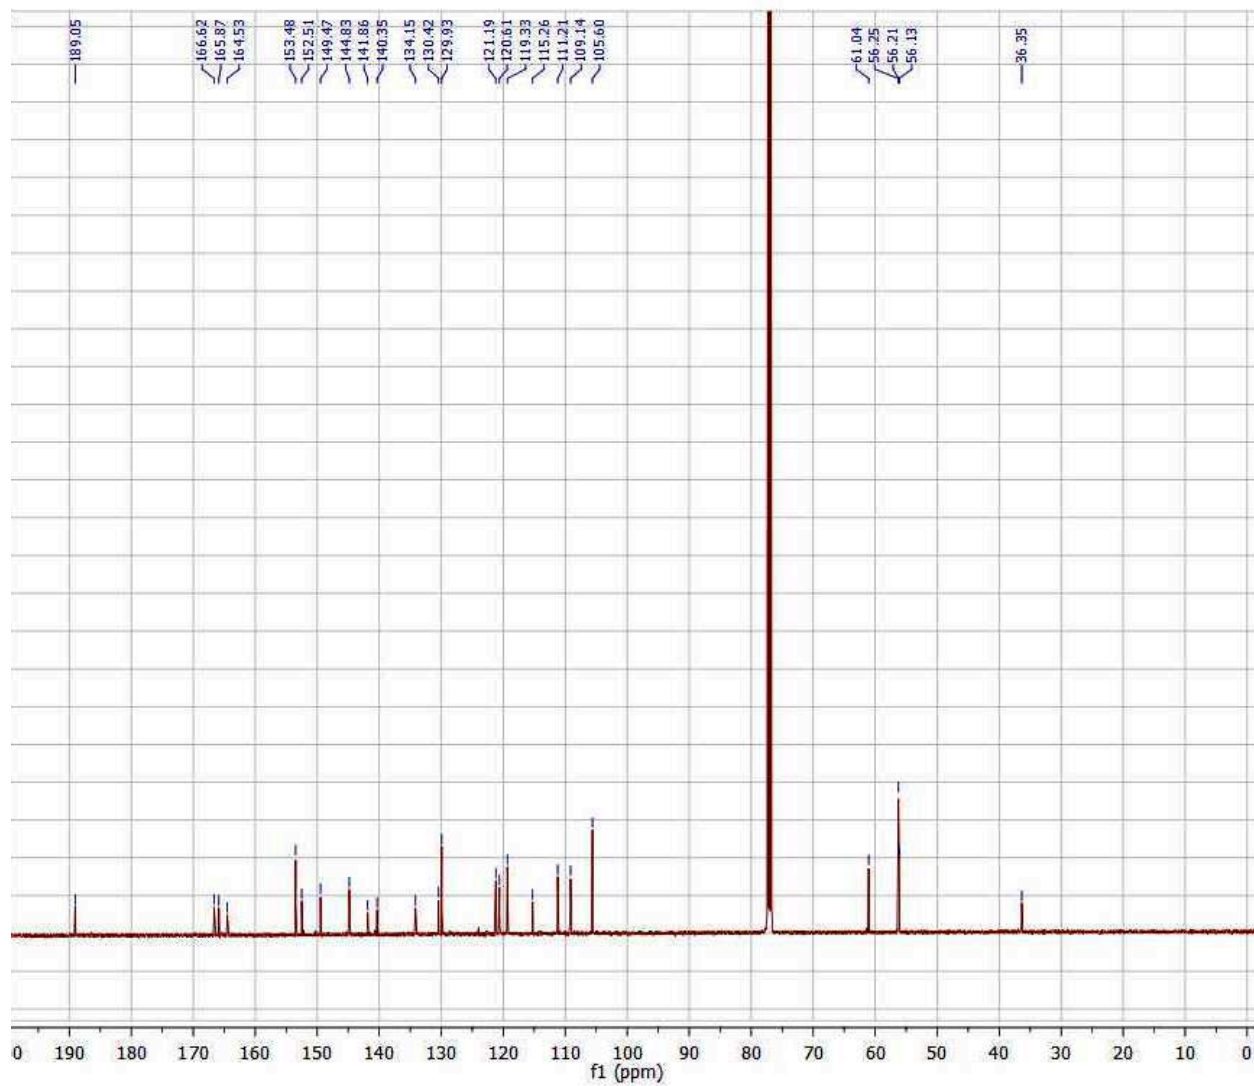

Fig.38.  $^{13}\text{C}$  NMR of compound 8s (125 MHz,  $\text{CDCl}_3$ )

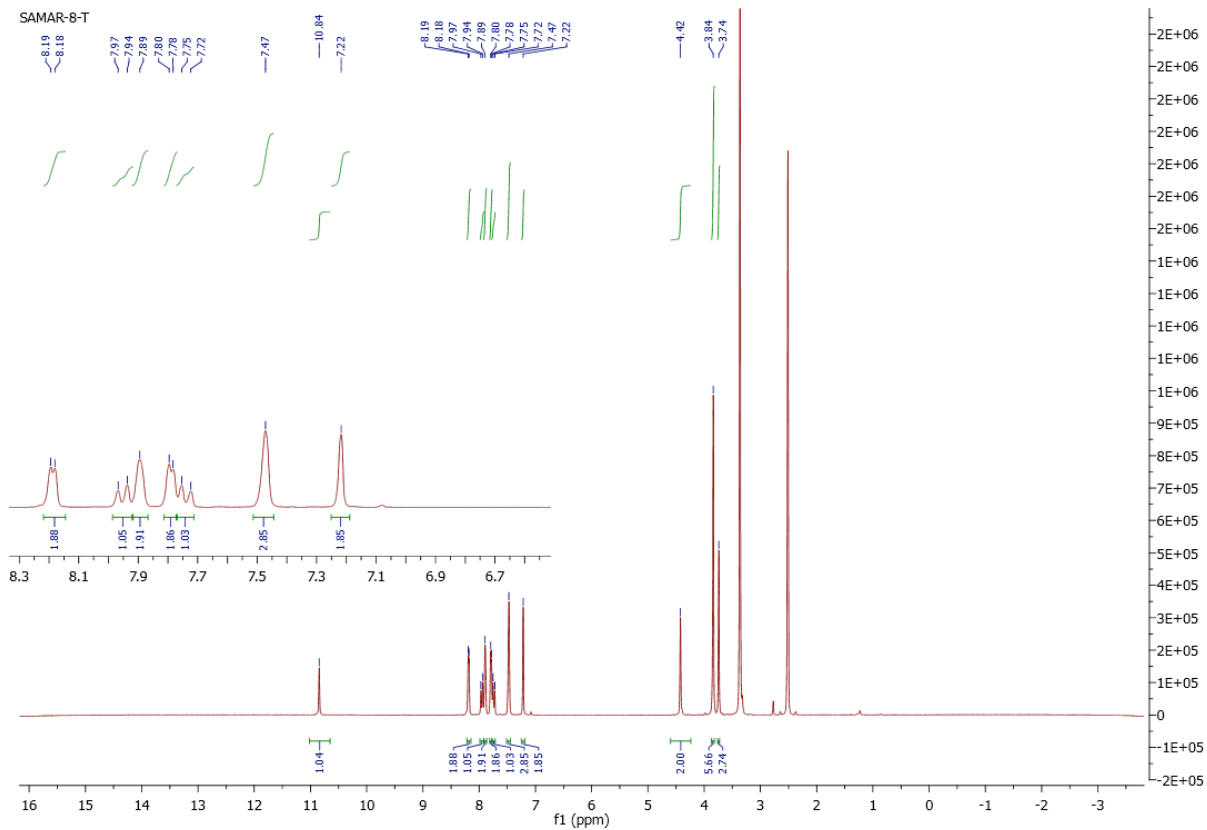

**Fig.39.**  $^1\text{H}$  NMR of compound 8t (500 MHz,  $\text{DMSO-}d_6$ )

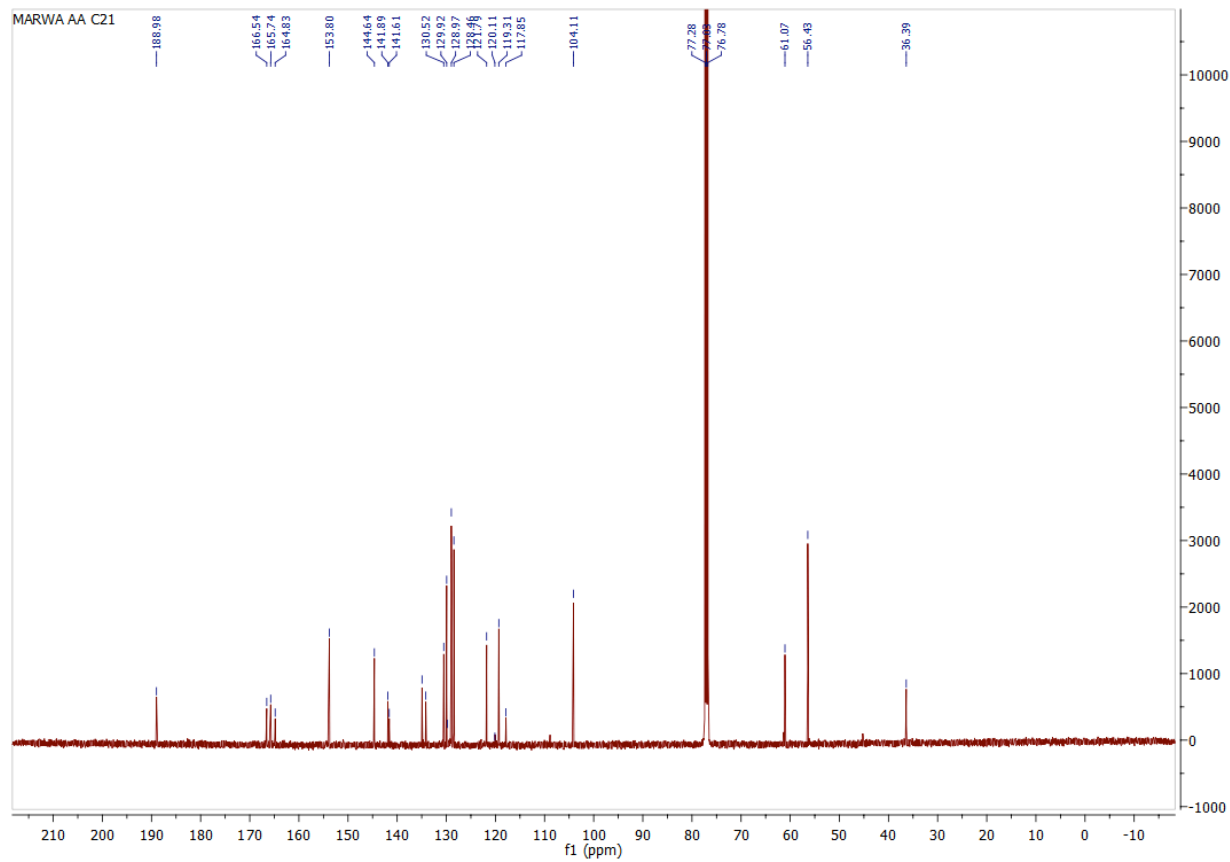

Fig.40.  $^{13}\text{C}$  NMR of compound 8t (125 MHz,  $\text{CDCl}_3$ )

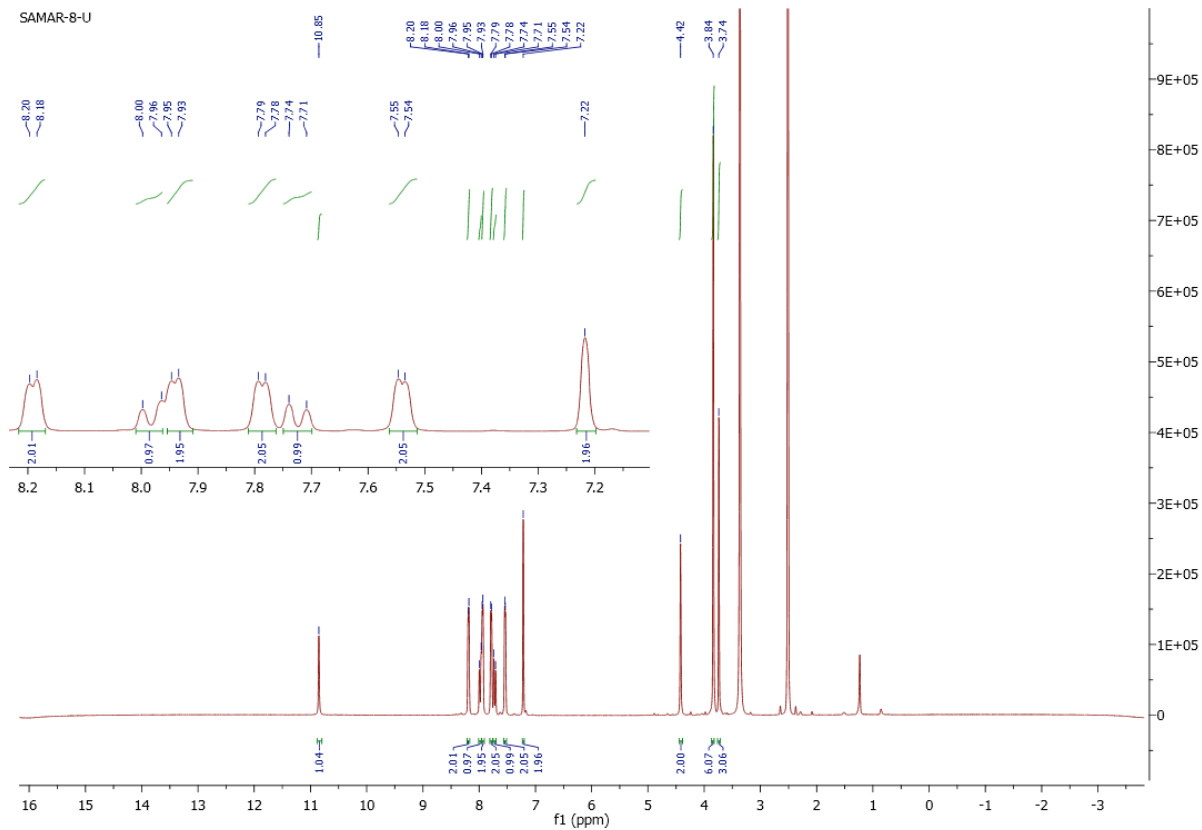

**Fig.41.**  $^1\text{H}$  NMR of compound **8u** (500 MHz,  $\text{DMSO-}d_6$ )

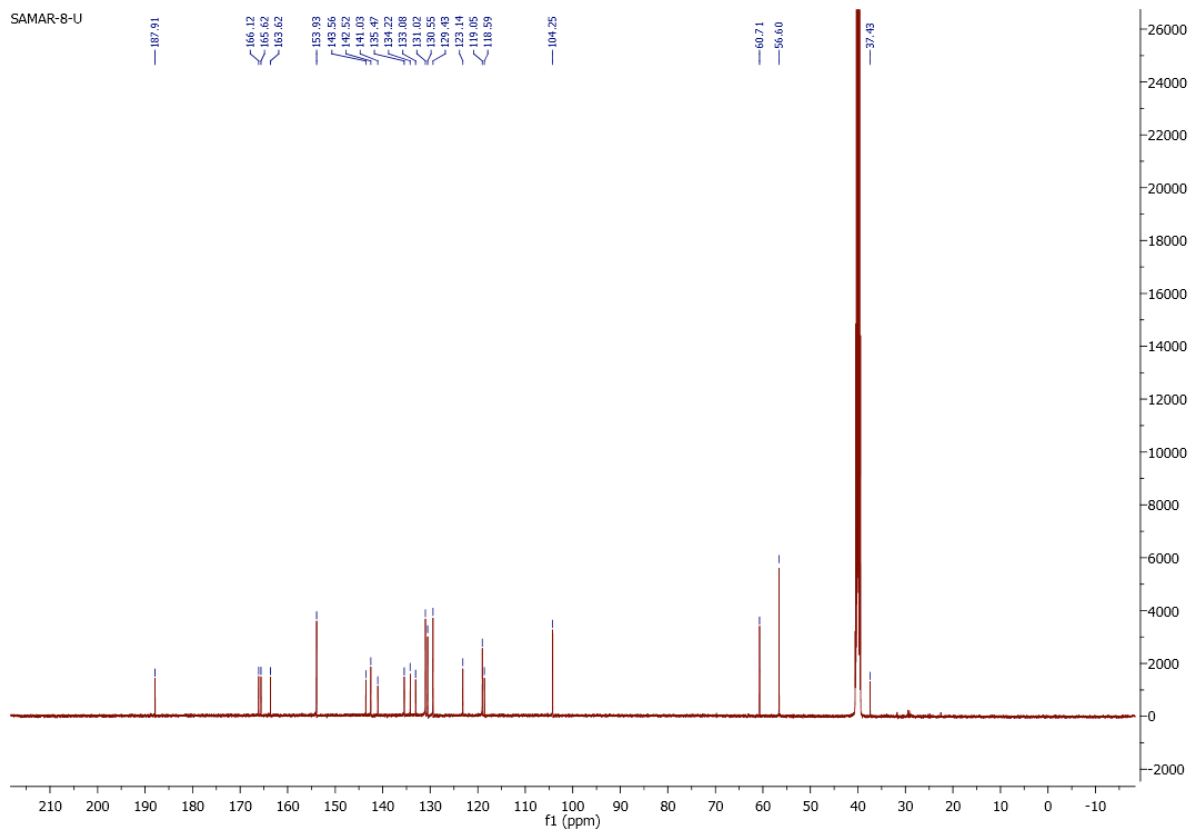

Fig.42.  $^{13}\text{C}$  NMR of compound 8u (125 MHz,  $\text{DMSO-}d_6$ )



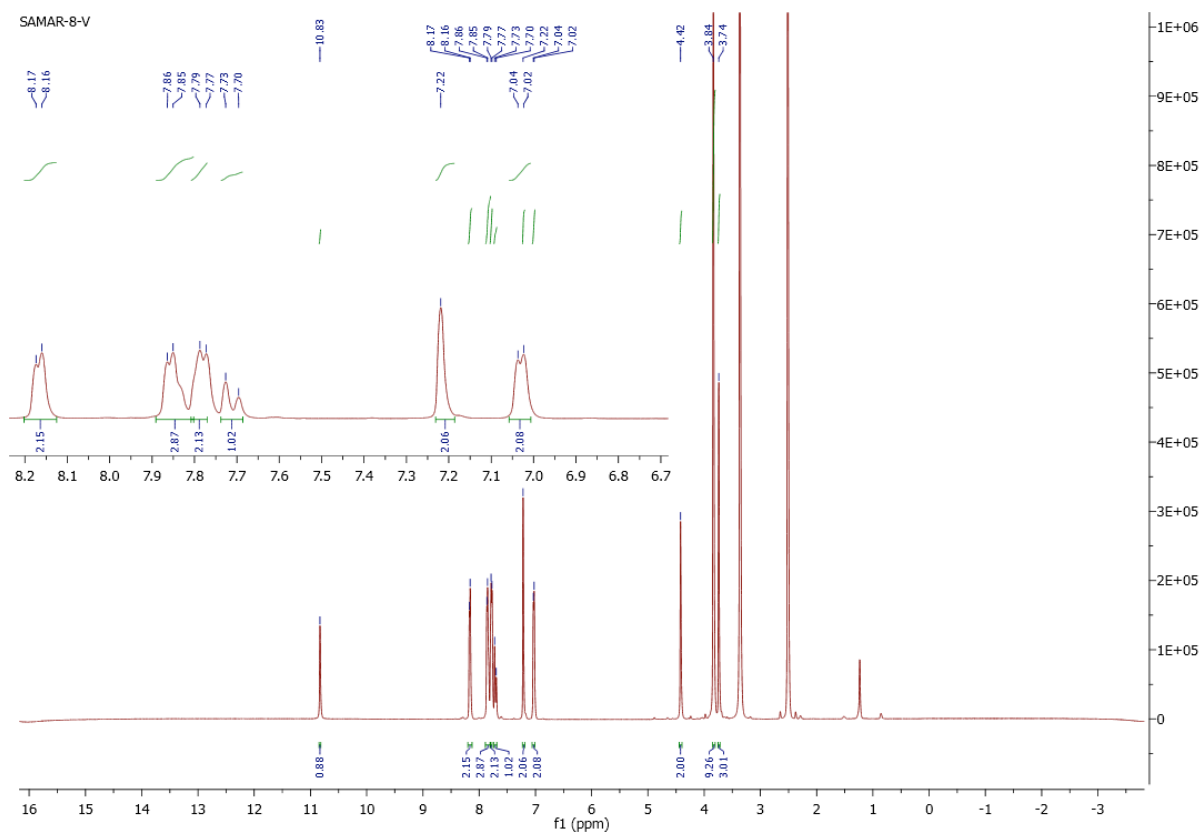

**Fig.43.**  $^1\text{H}$  NMR of compound 8v (500 MHz,  $\text{DMSO-}d_6$ )

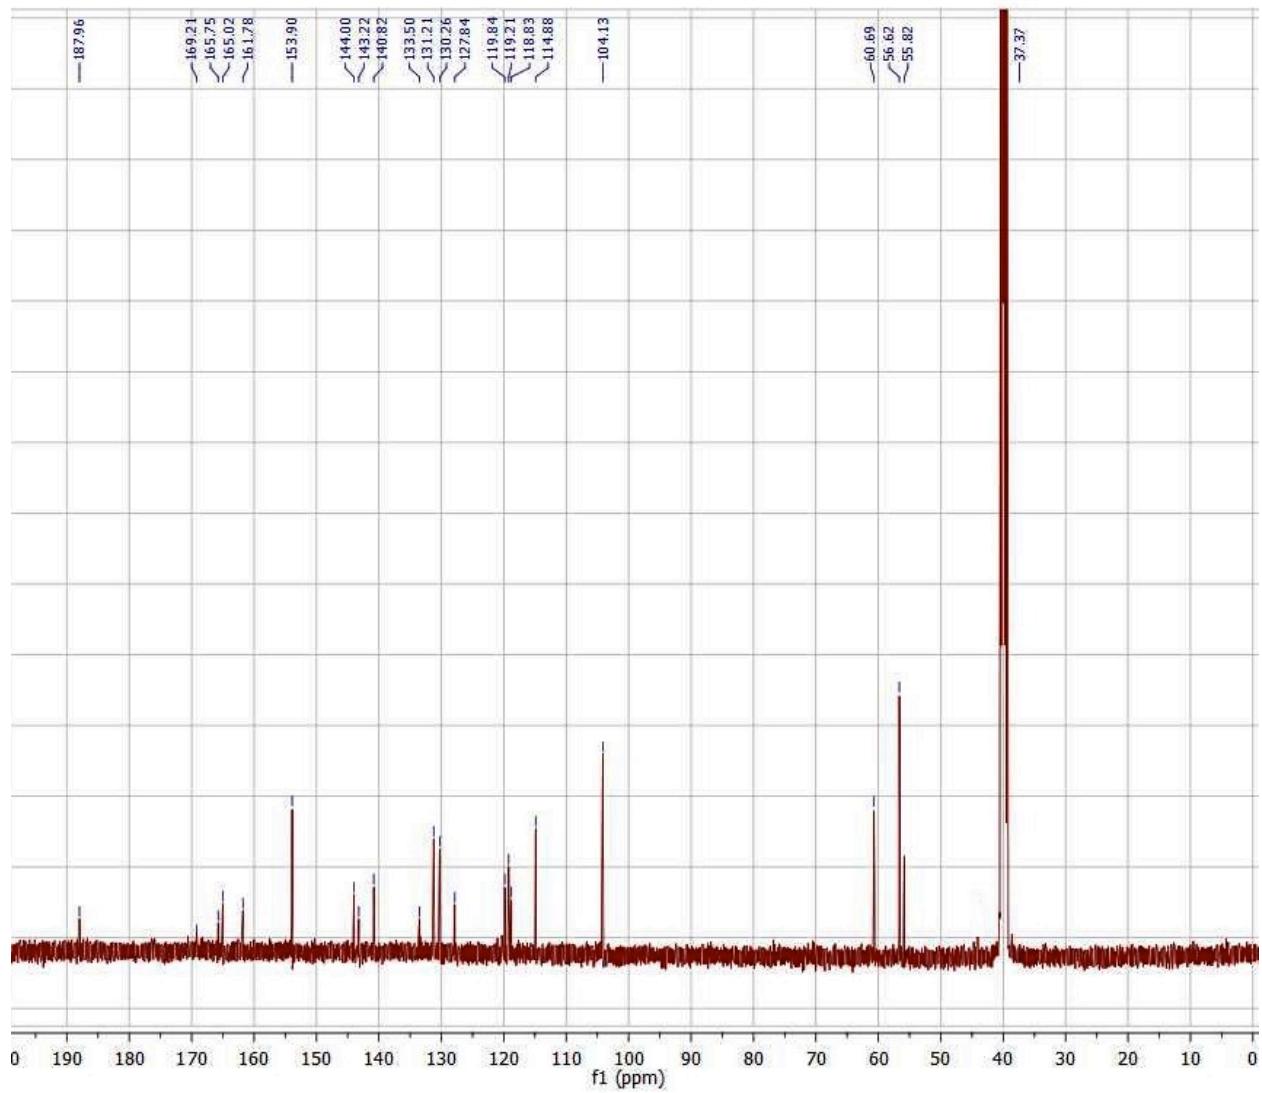

Fig.44.  $^{13}\text{C}$  NMR of compound 8v (125 MHz,  $\text{DMSO-}d_6$ )

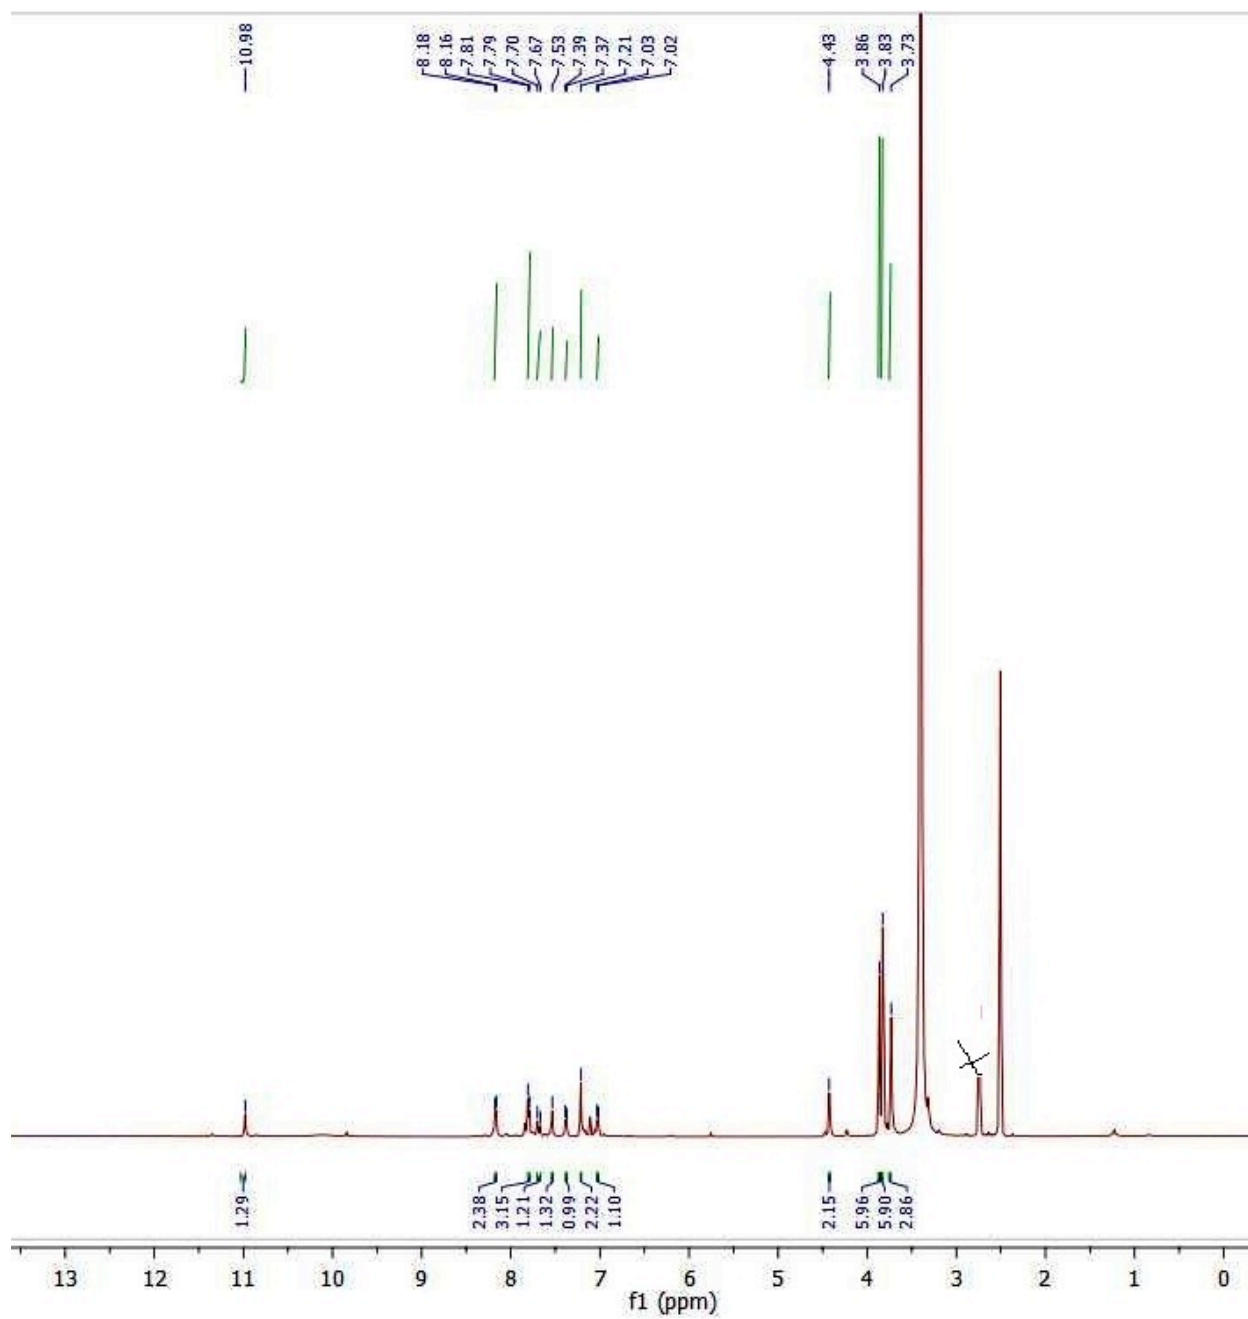

Fig.45.  $^1\text{H}$  NMR of compound 8w (500 MHz,  $\text{DMSO-}d_6$ )

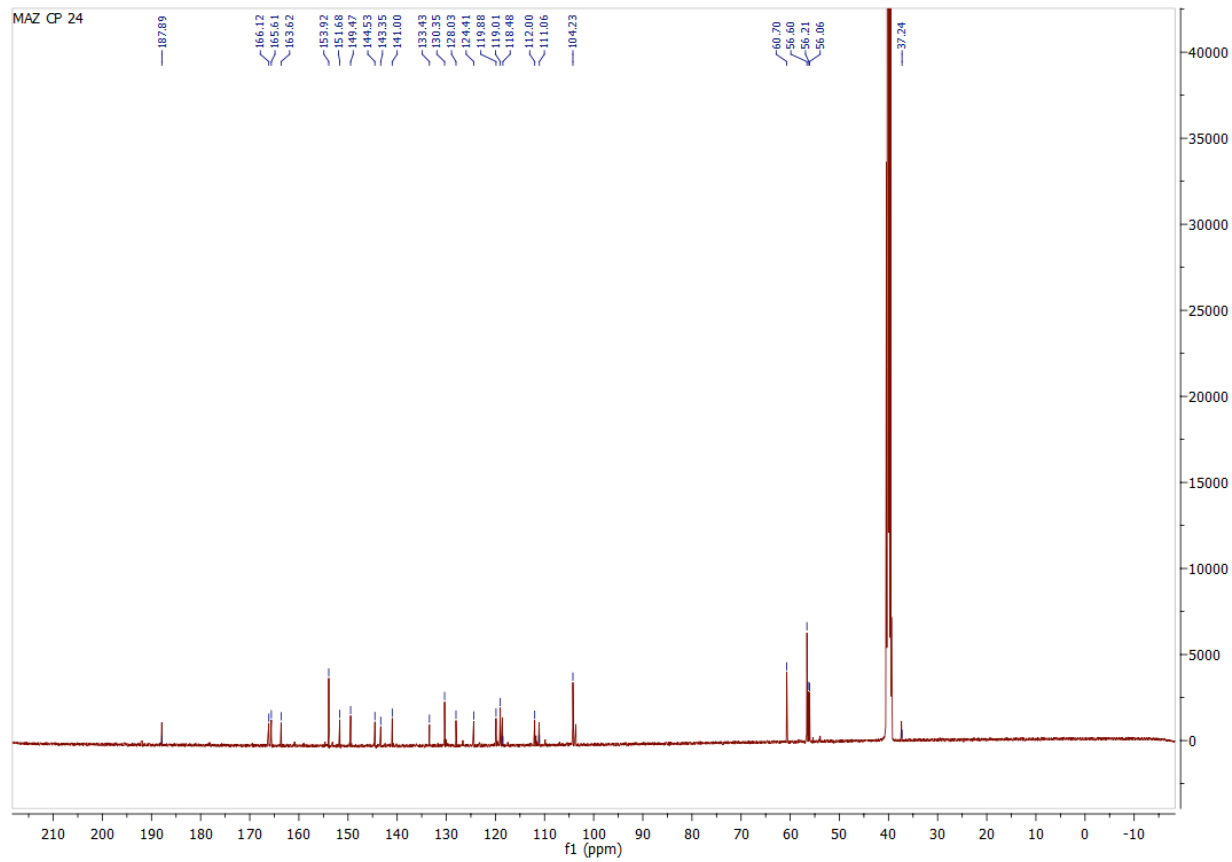

Fig.46.  $^{13}\text{C}$  NMR of compound 8w (125 MHz,  $\text{DMSO-}d_6$ )

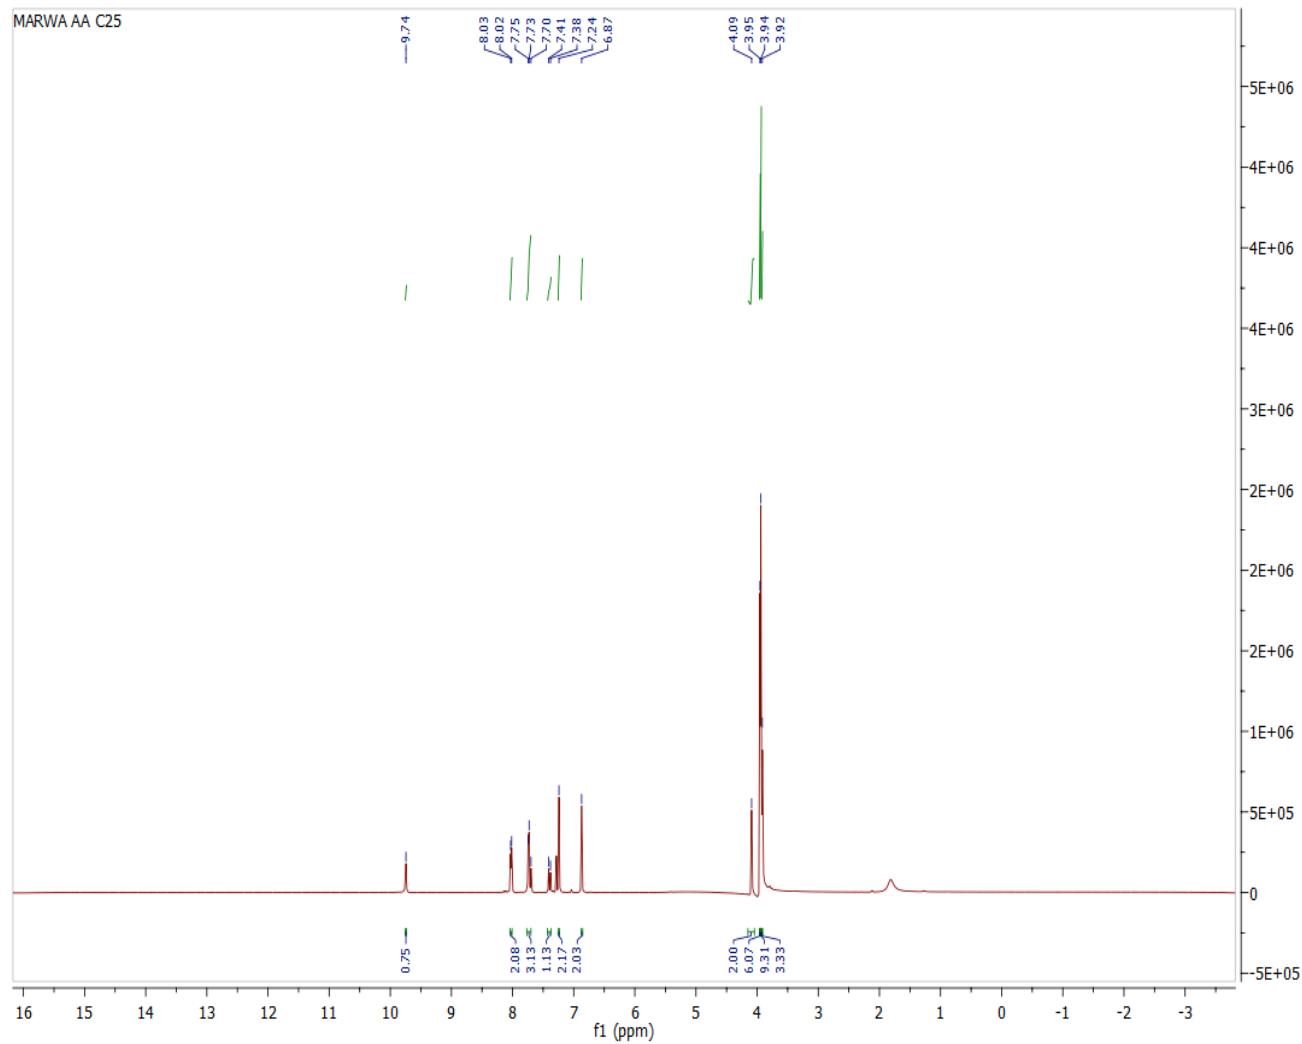

Fig.47.  $^1\text{H}$  NMR of compound 8x (500 MHz,  $\text{CDCl}_3$ )

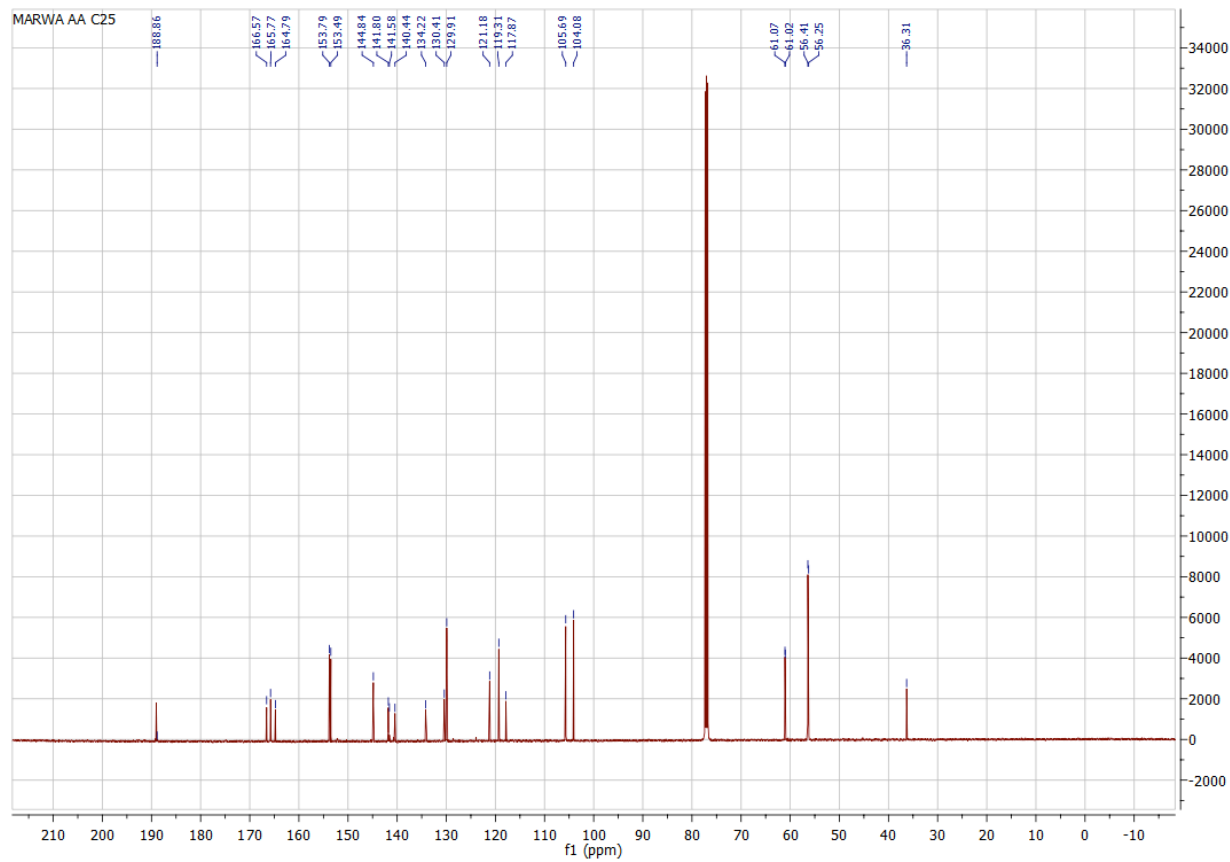

Fig.48.  $^{13}\text{C}$  NMR of compound 8x (125 MHz,  $\text{CDCl}_3$ )

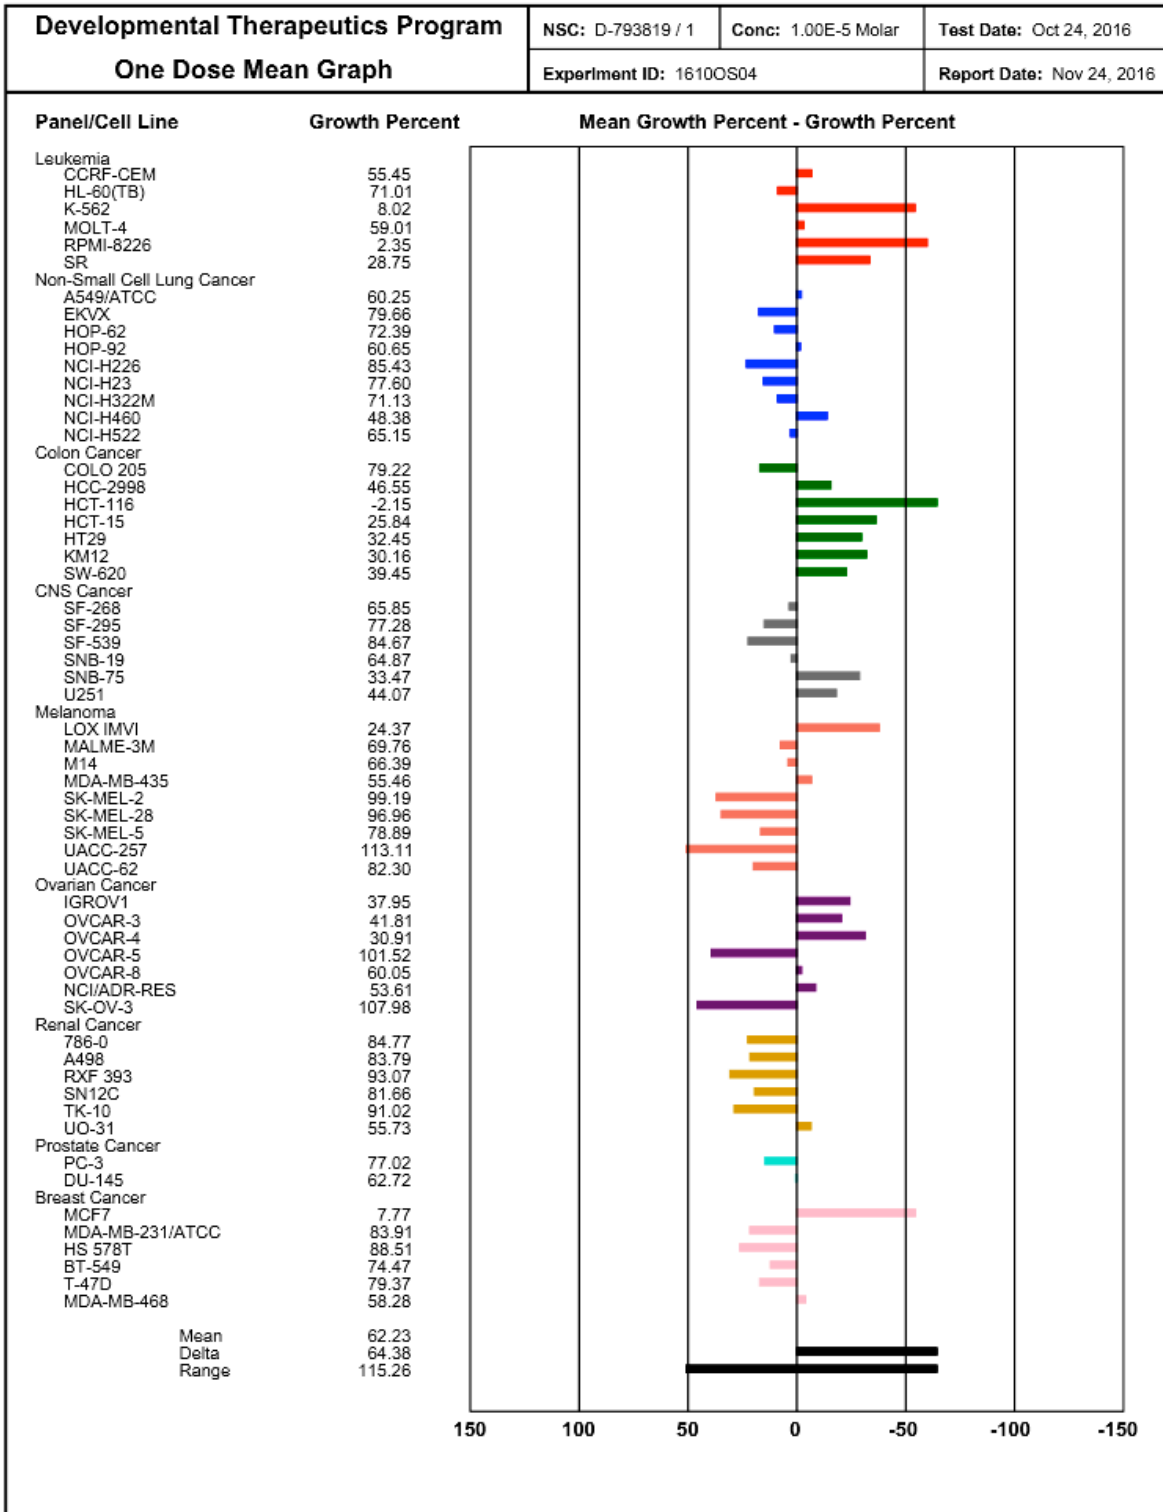

**Fig.49.** one dose mean graph of nine different cancer cell line panels for compound **8a**

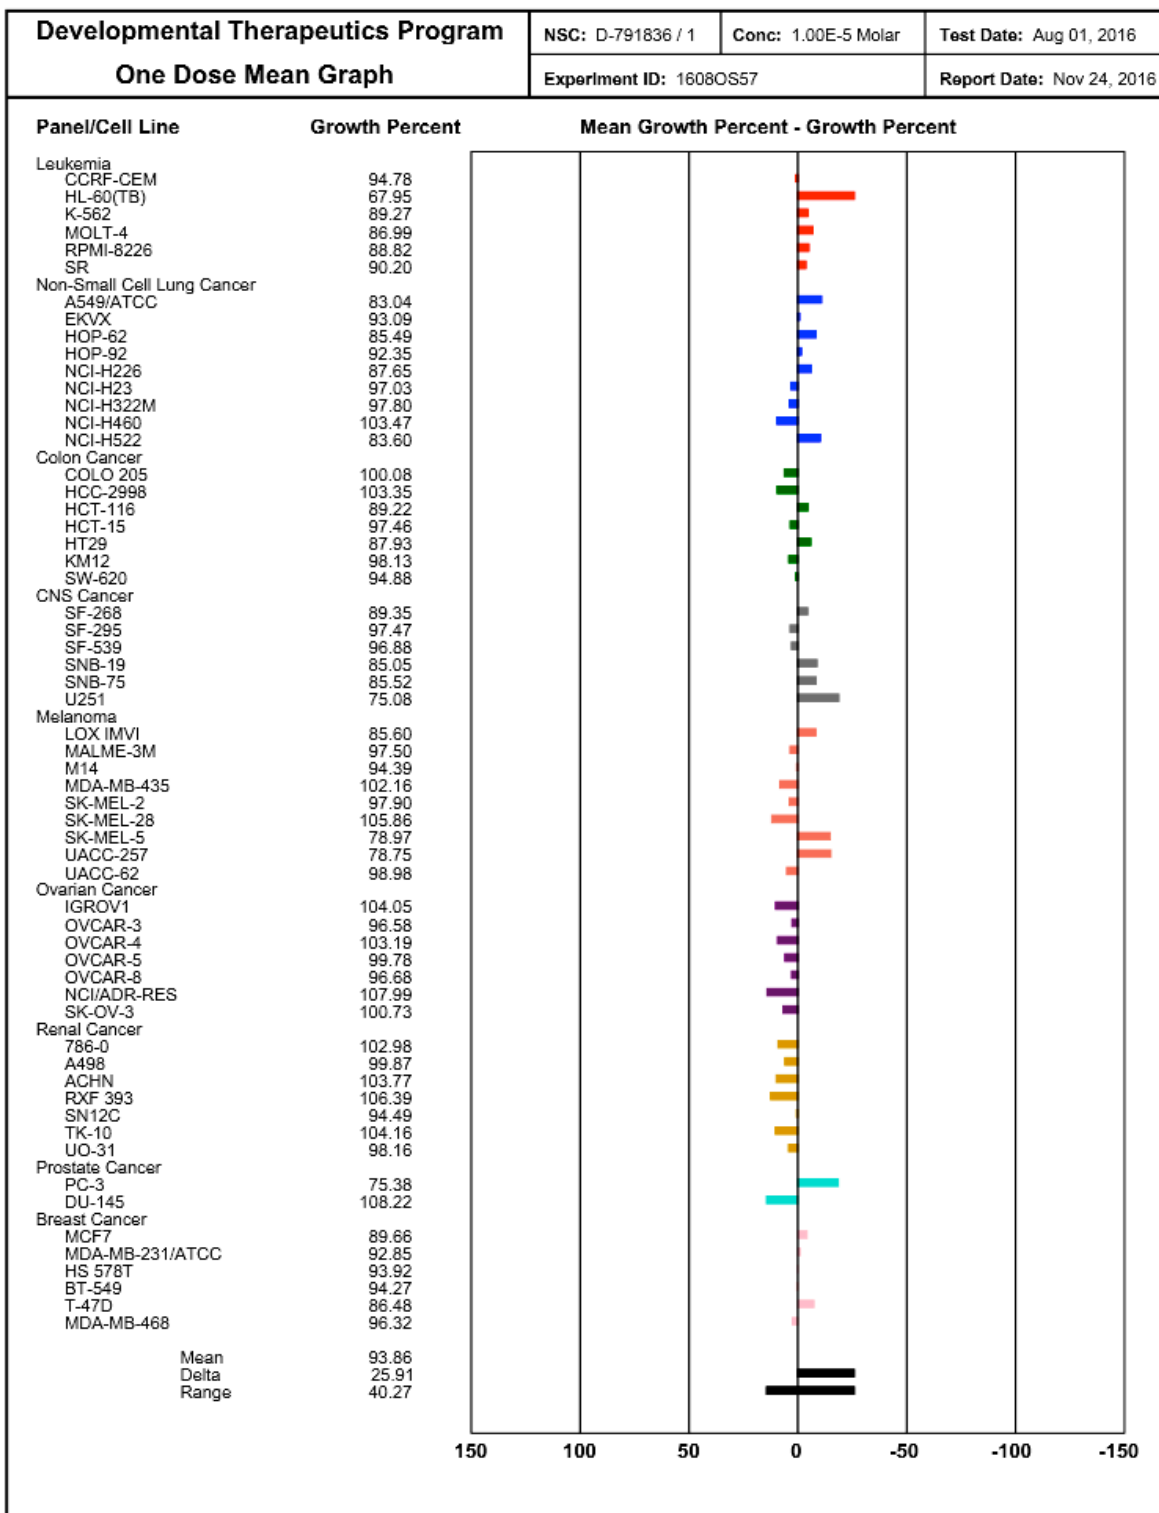

Fig.50. One dose mean graph of nine different cancer cell line panels for compound 8b



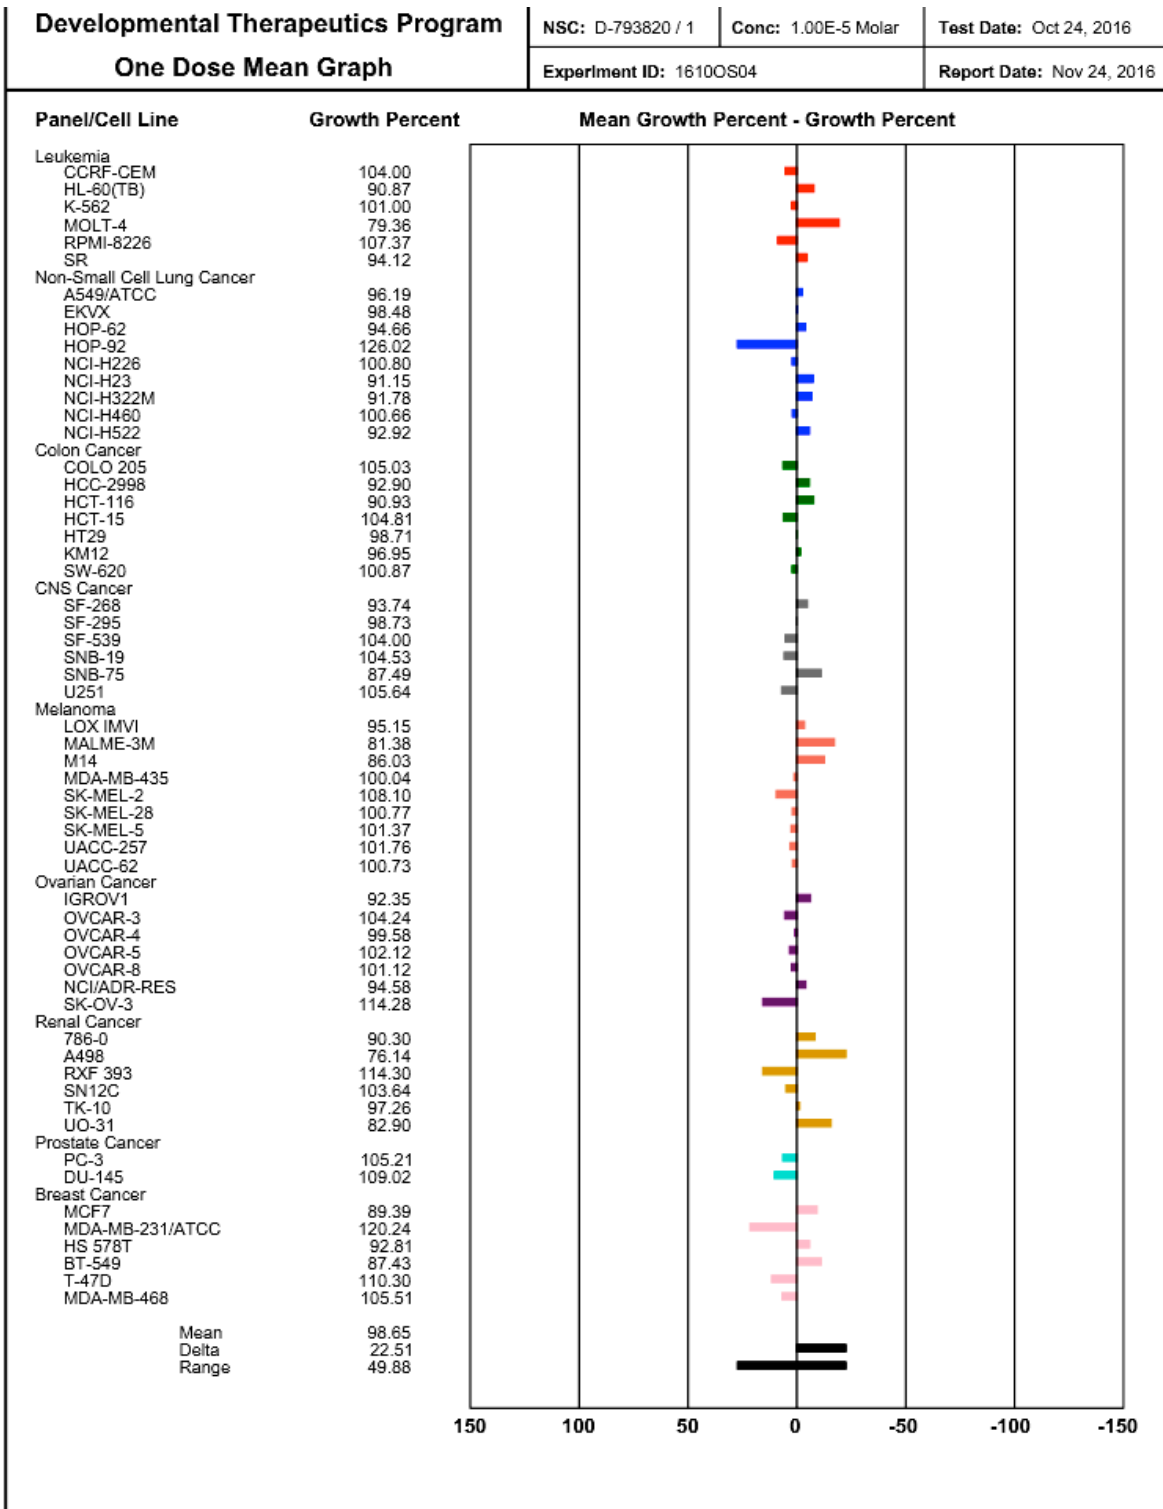

**Fig.51.** one dose mean graph of nine different cancer cell line panels for compound **8c**

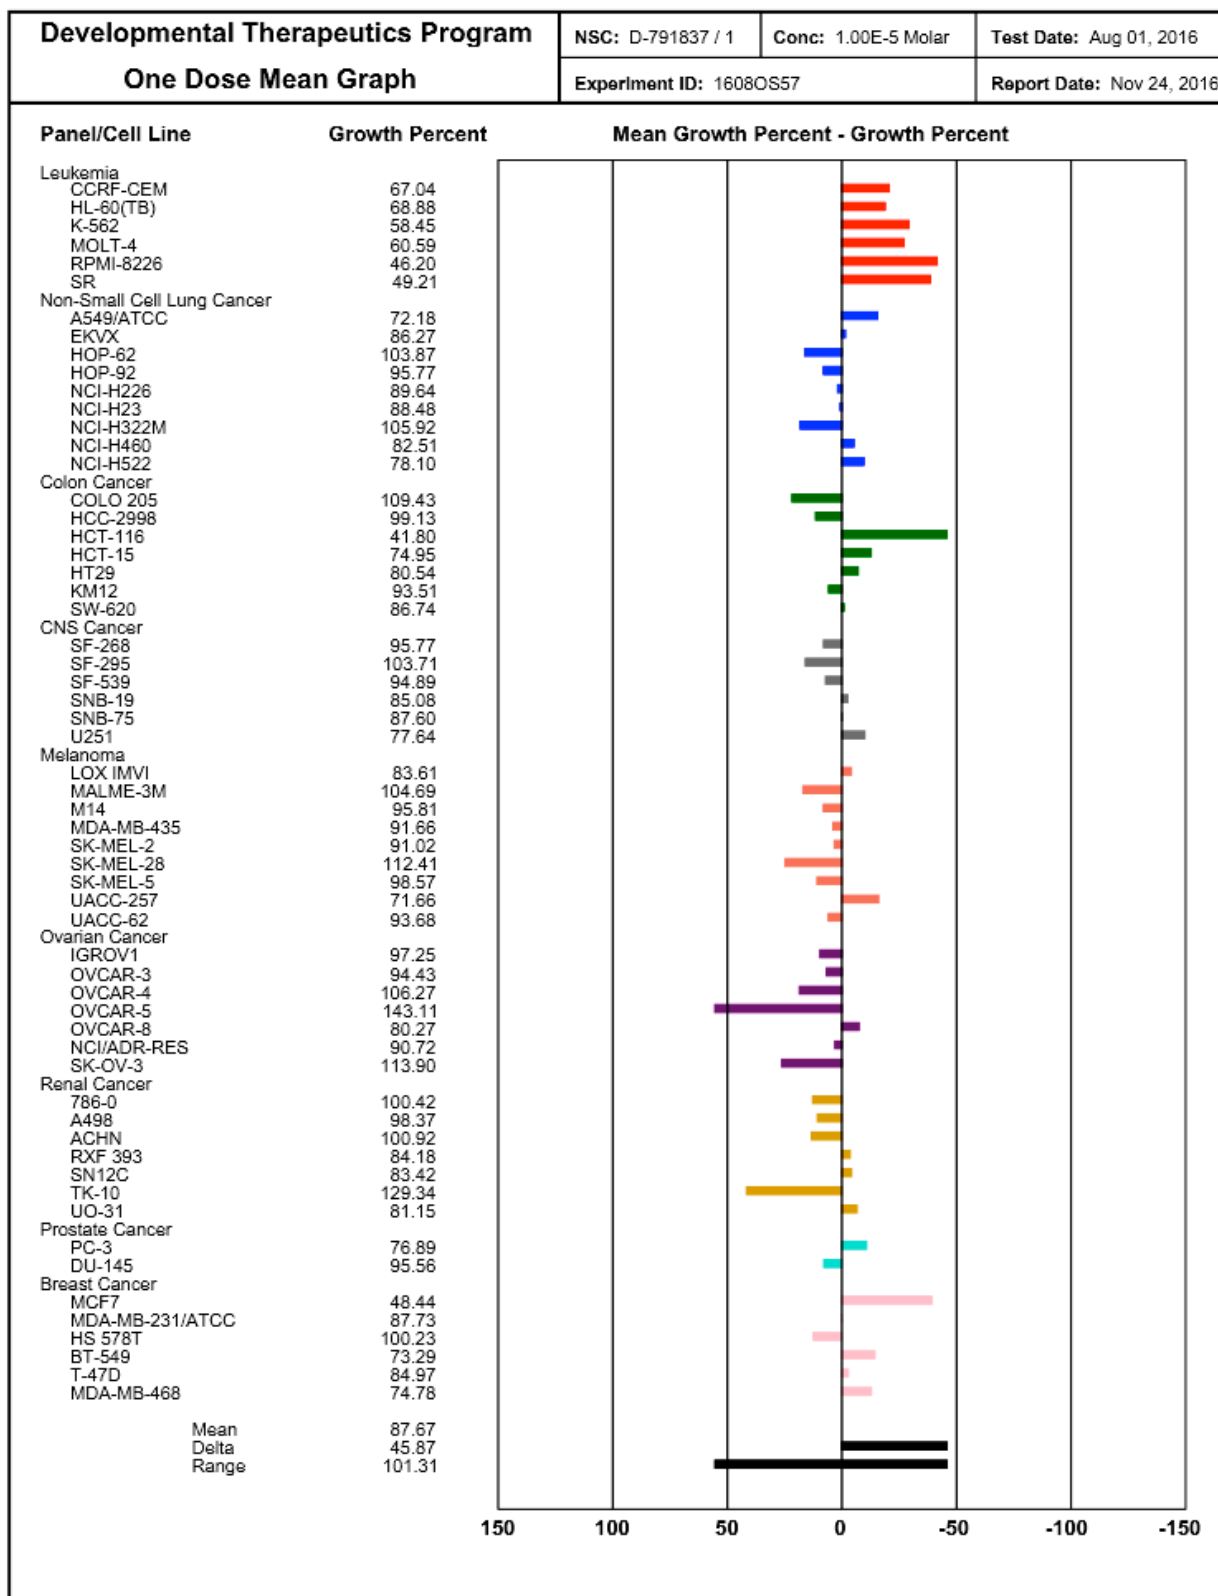

**Fig.52.** one dose mean graph of nine different cancer cell line panels for compound **8d**

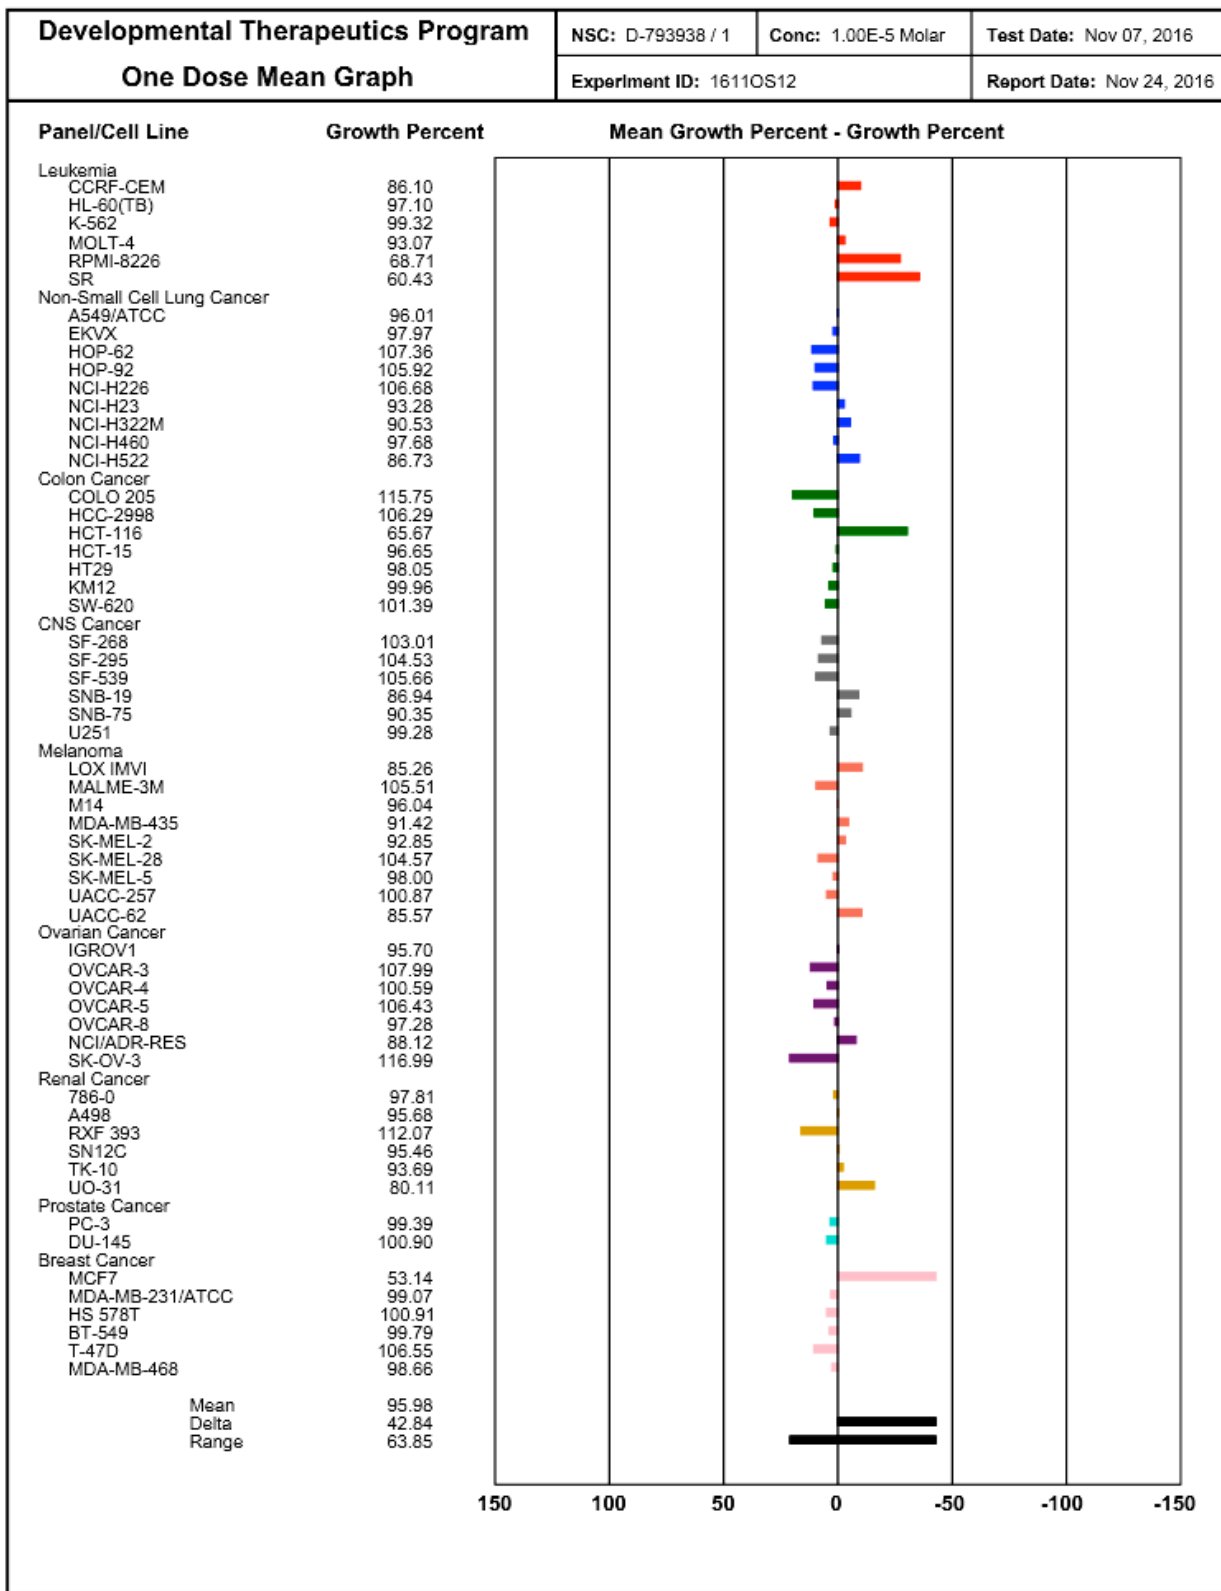

Fig.53. One dose mean graph of nine different cancer cell line panels for compound **8e**

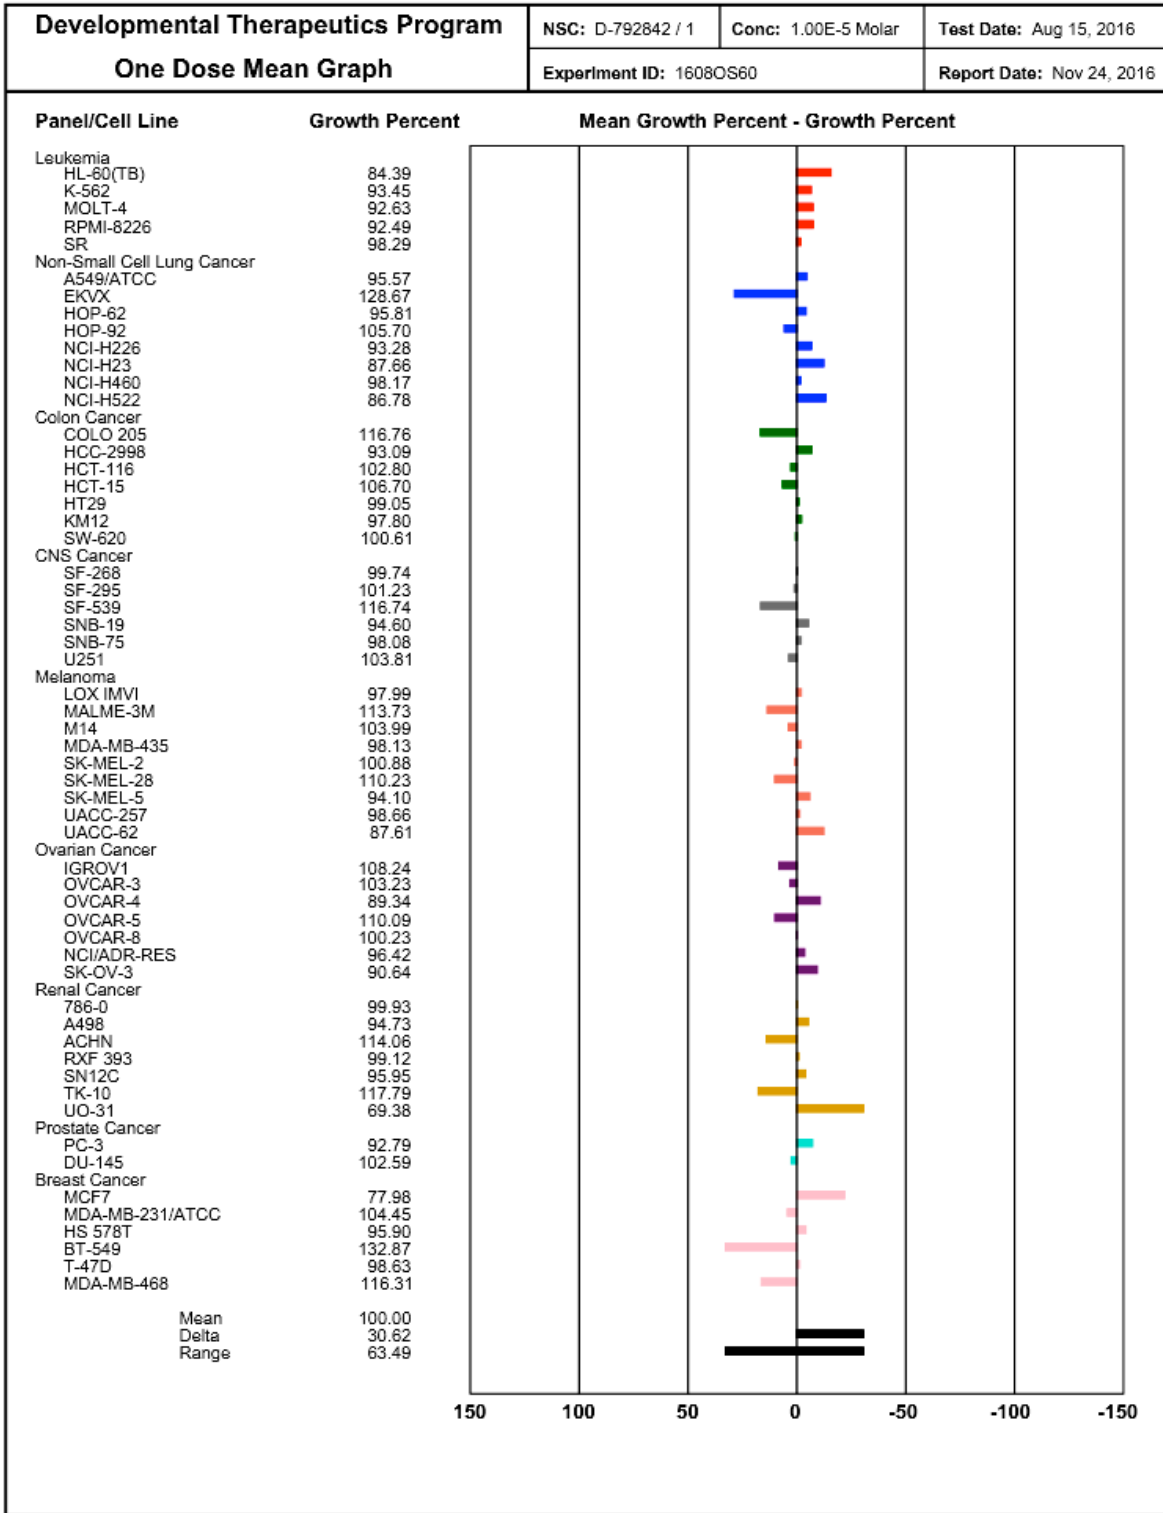

Fig.54. One dose mean graph of nine different cancer cell line panels for compound 8f

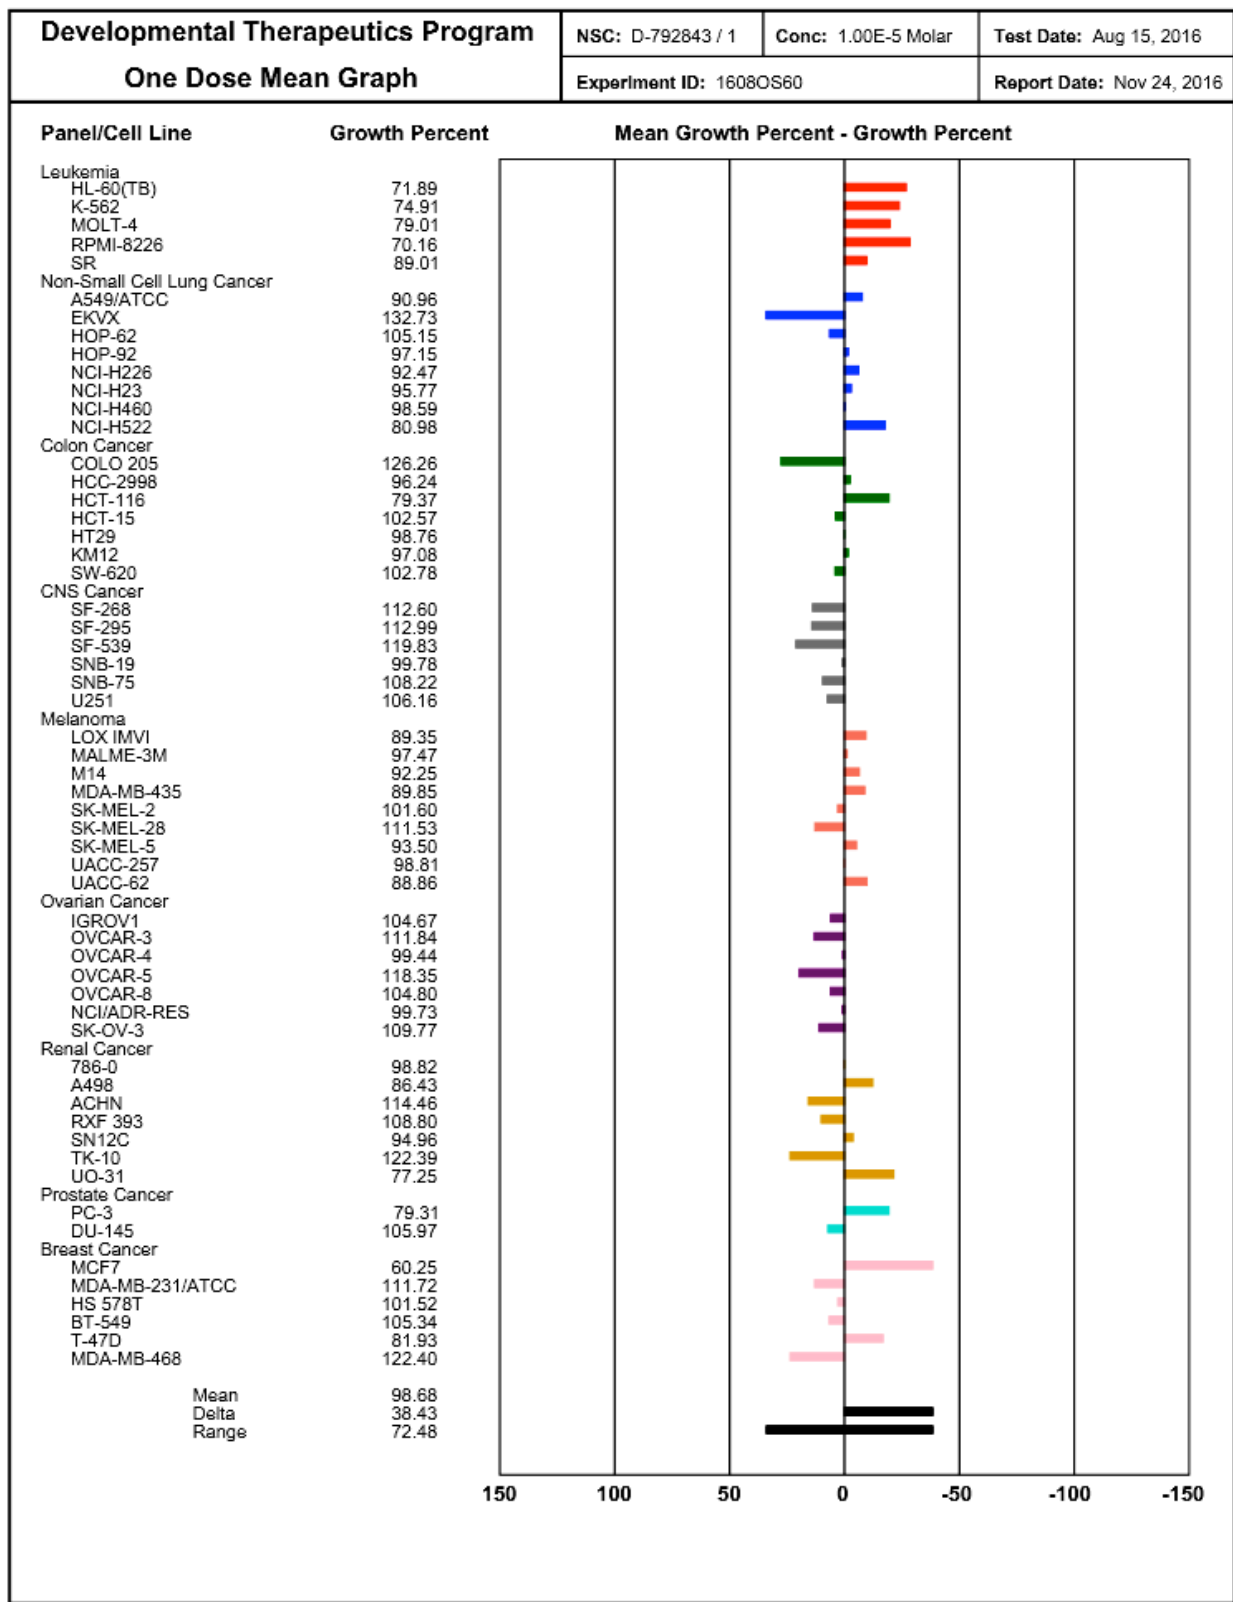

Fig.55. One dose mean graph of nine different cancer cell line panels for compound 8g

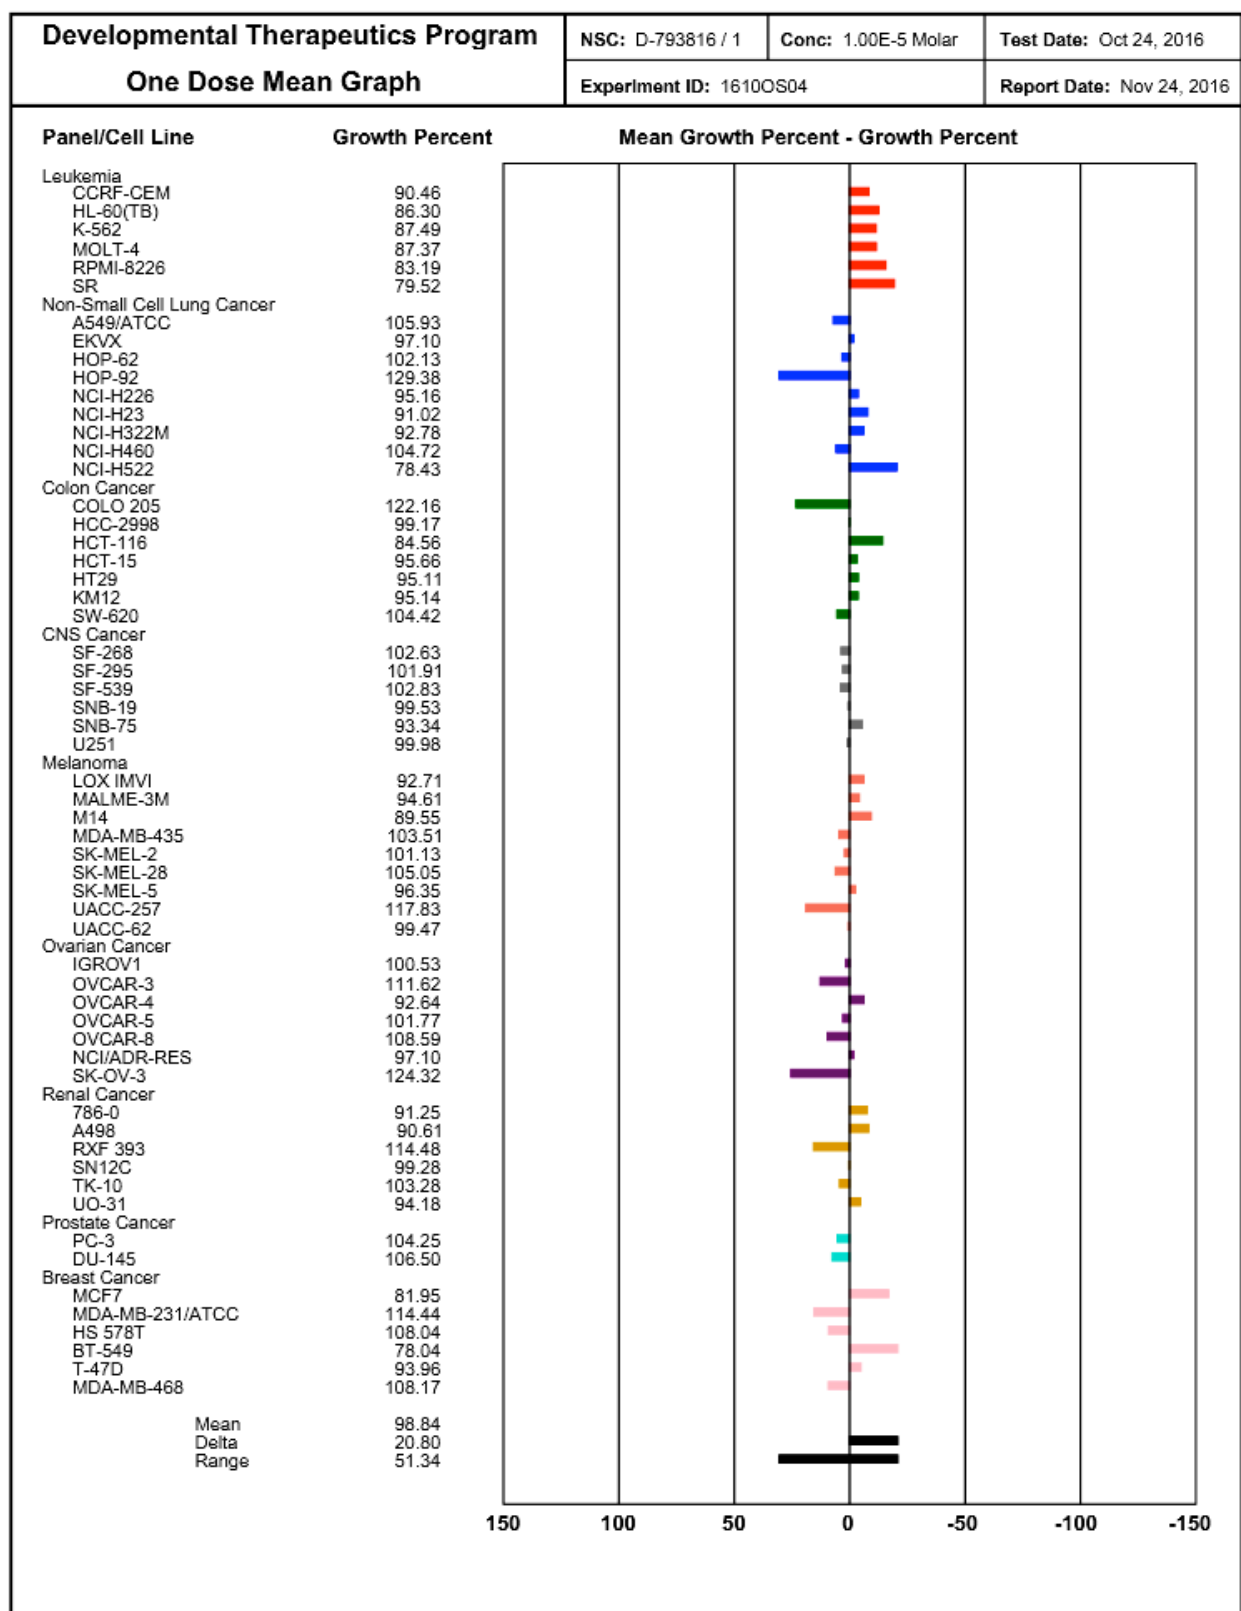

Fig.56. One dose mean graph of nine different cancer cell line panels for compound 8h

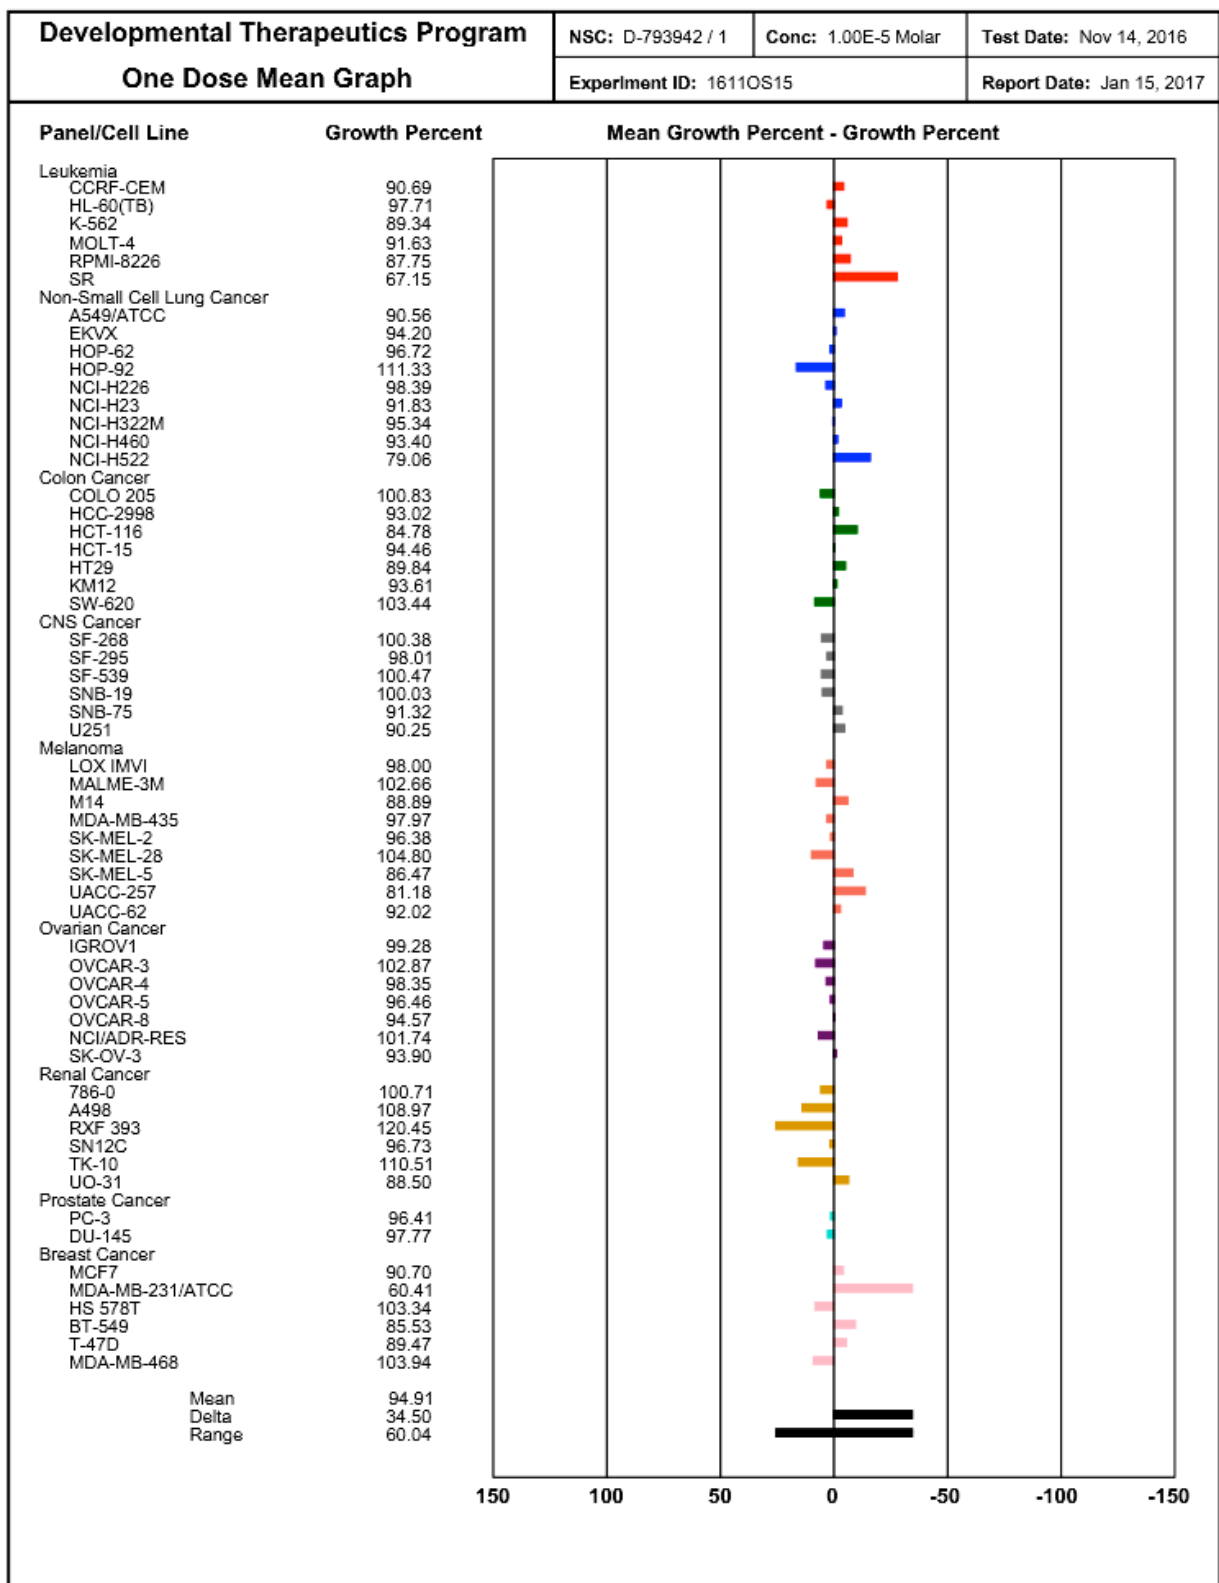

Fig.57. One dose mean graph of nine different cancer cell line panels for compound 8i

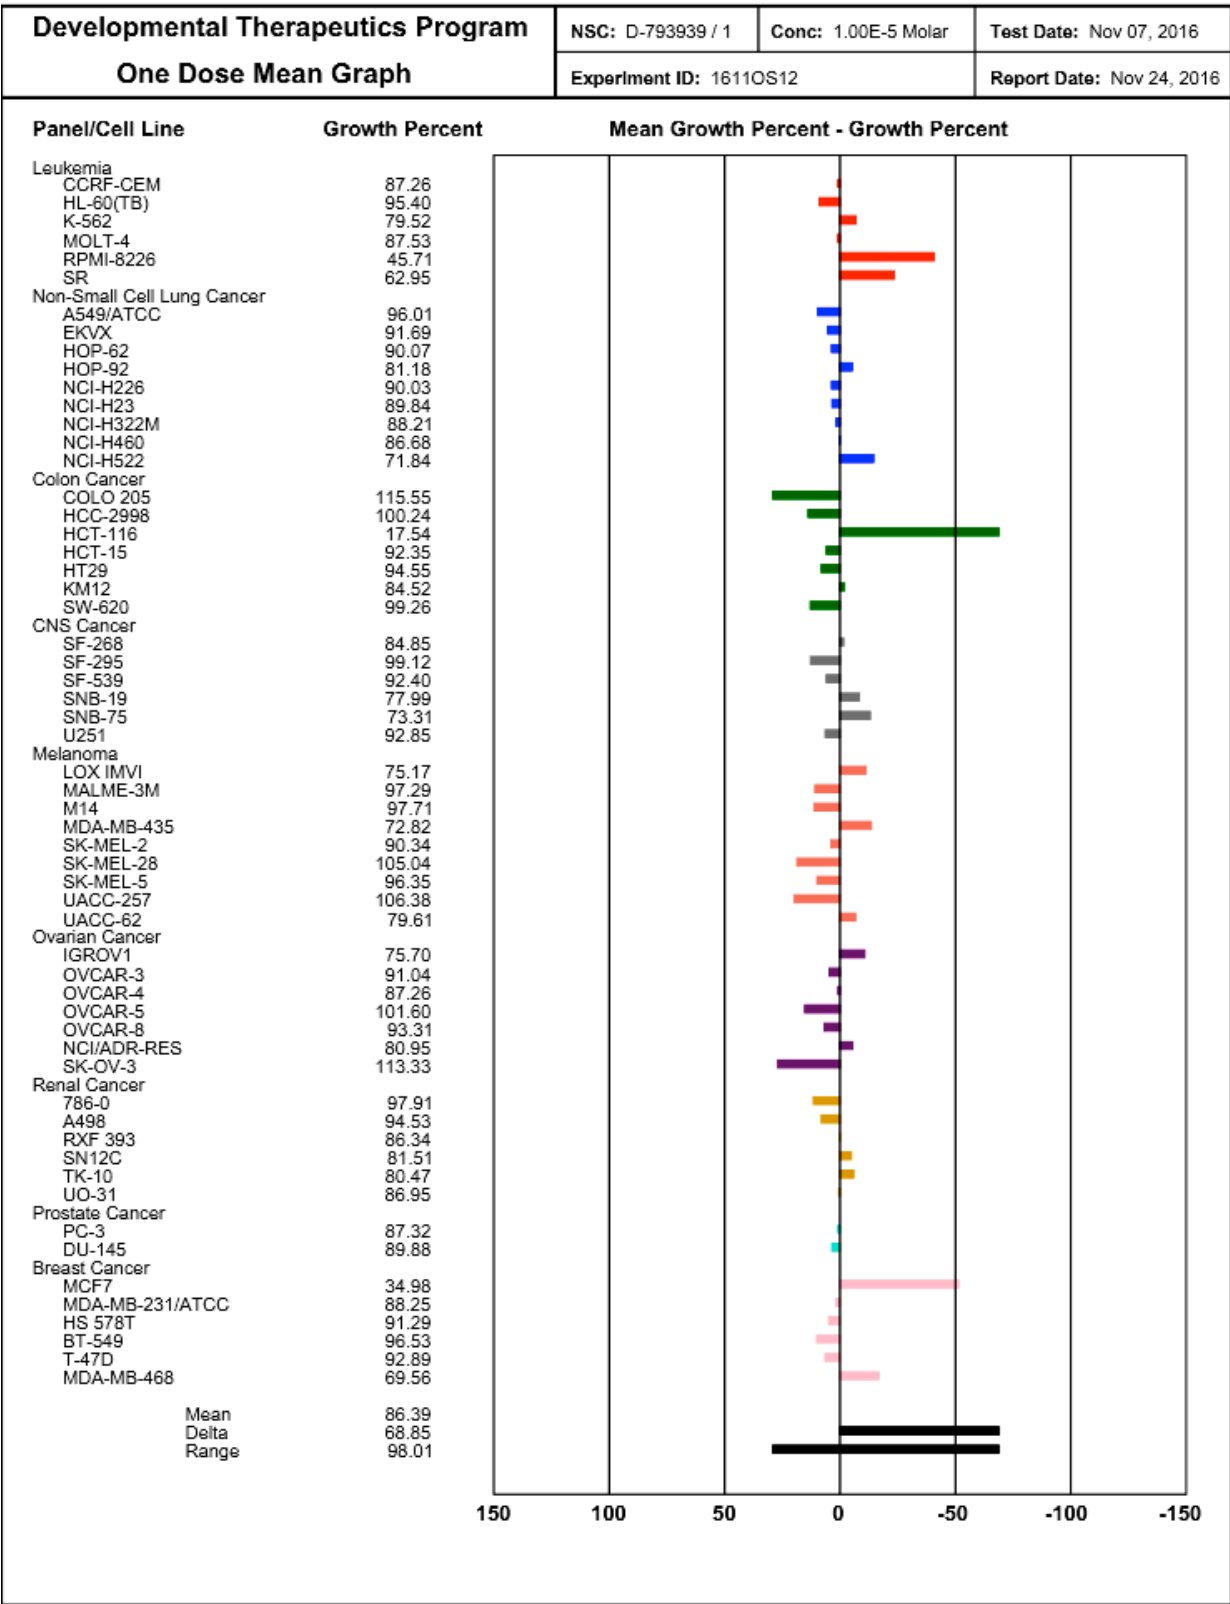

Fig.58. One dose mean graph of nine different cancer cell line panels for compound 8j



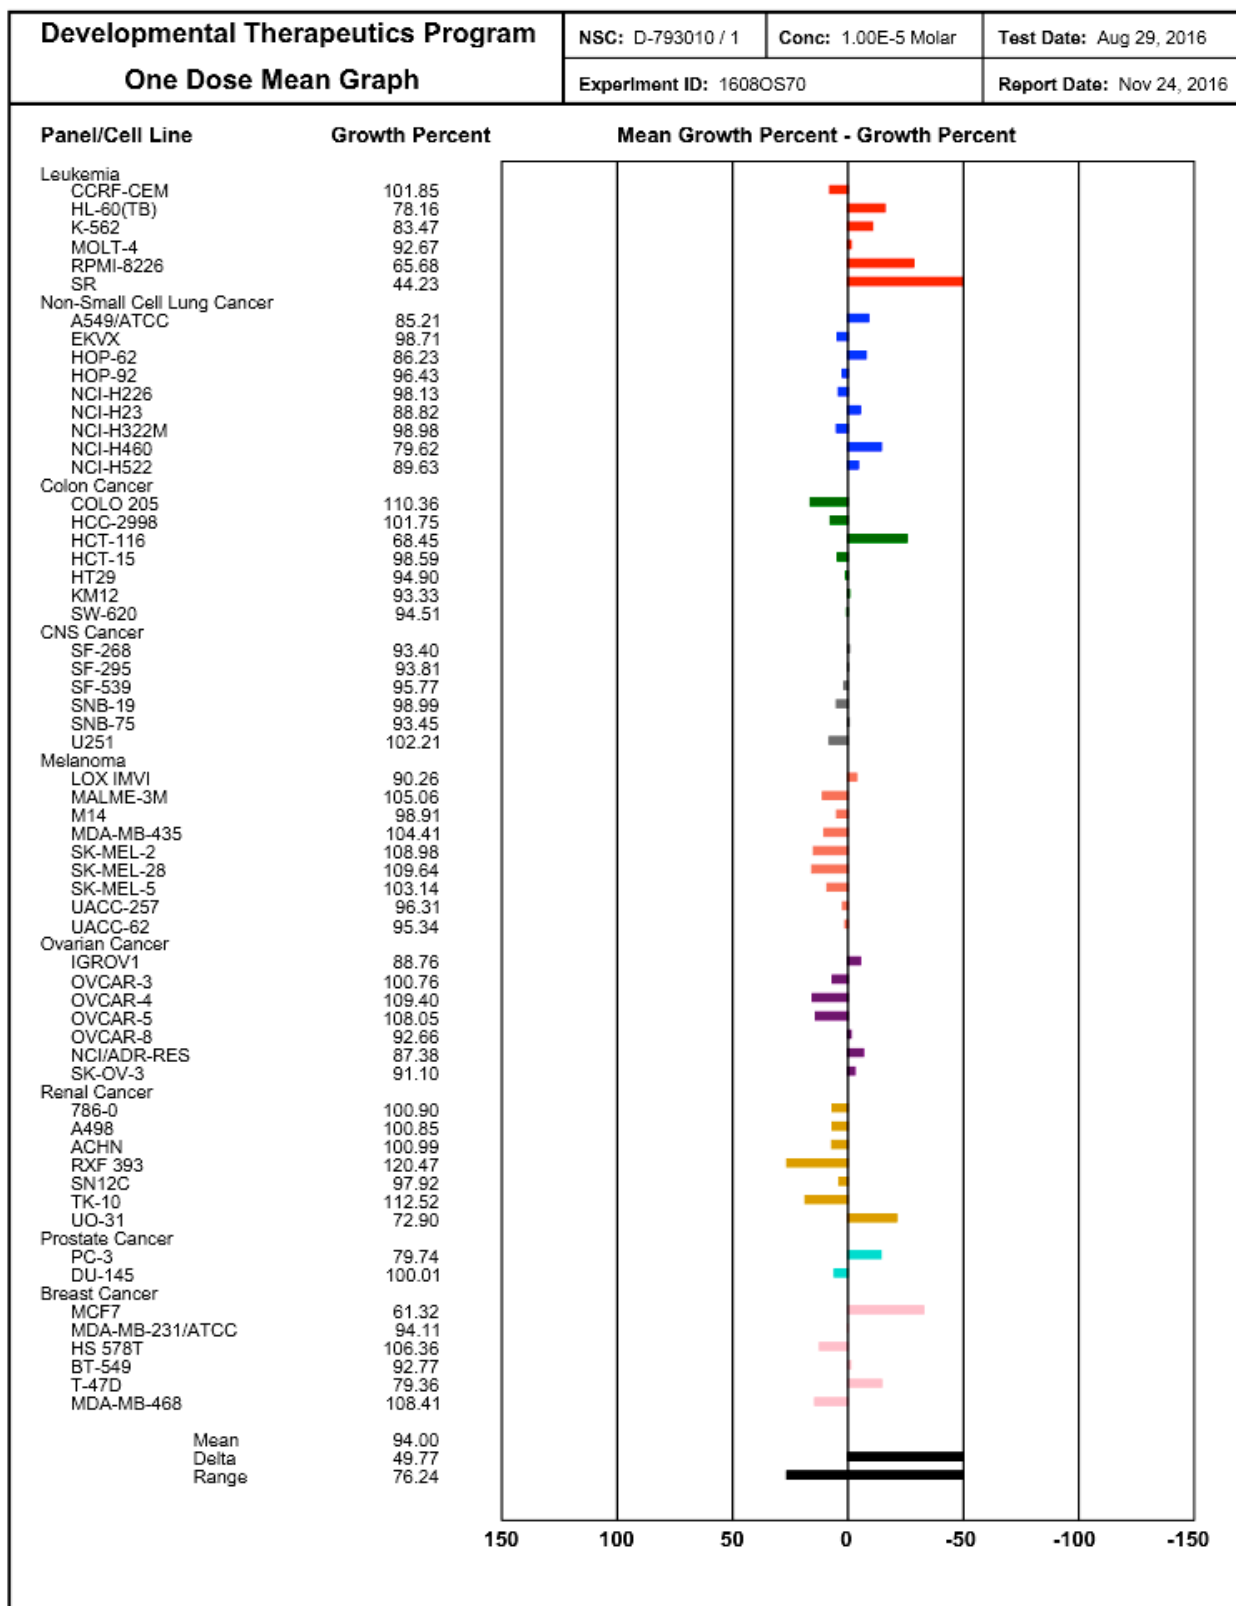

Fig.59. One dose mean graph of nine different cancer cell line panels for compound 8k

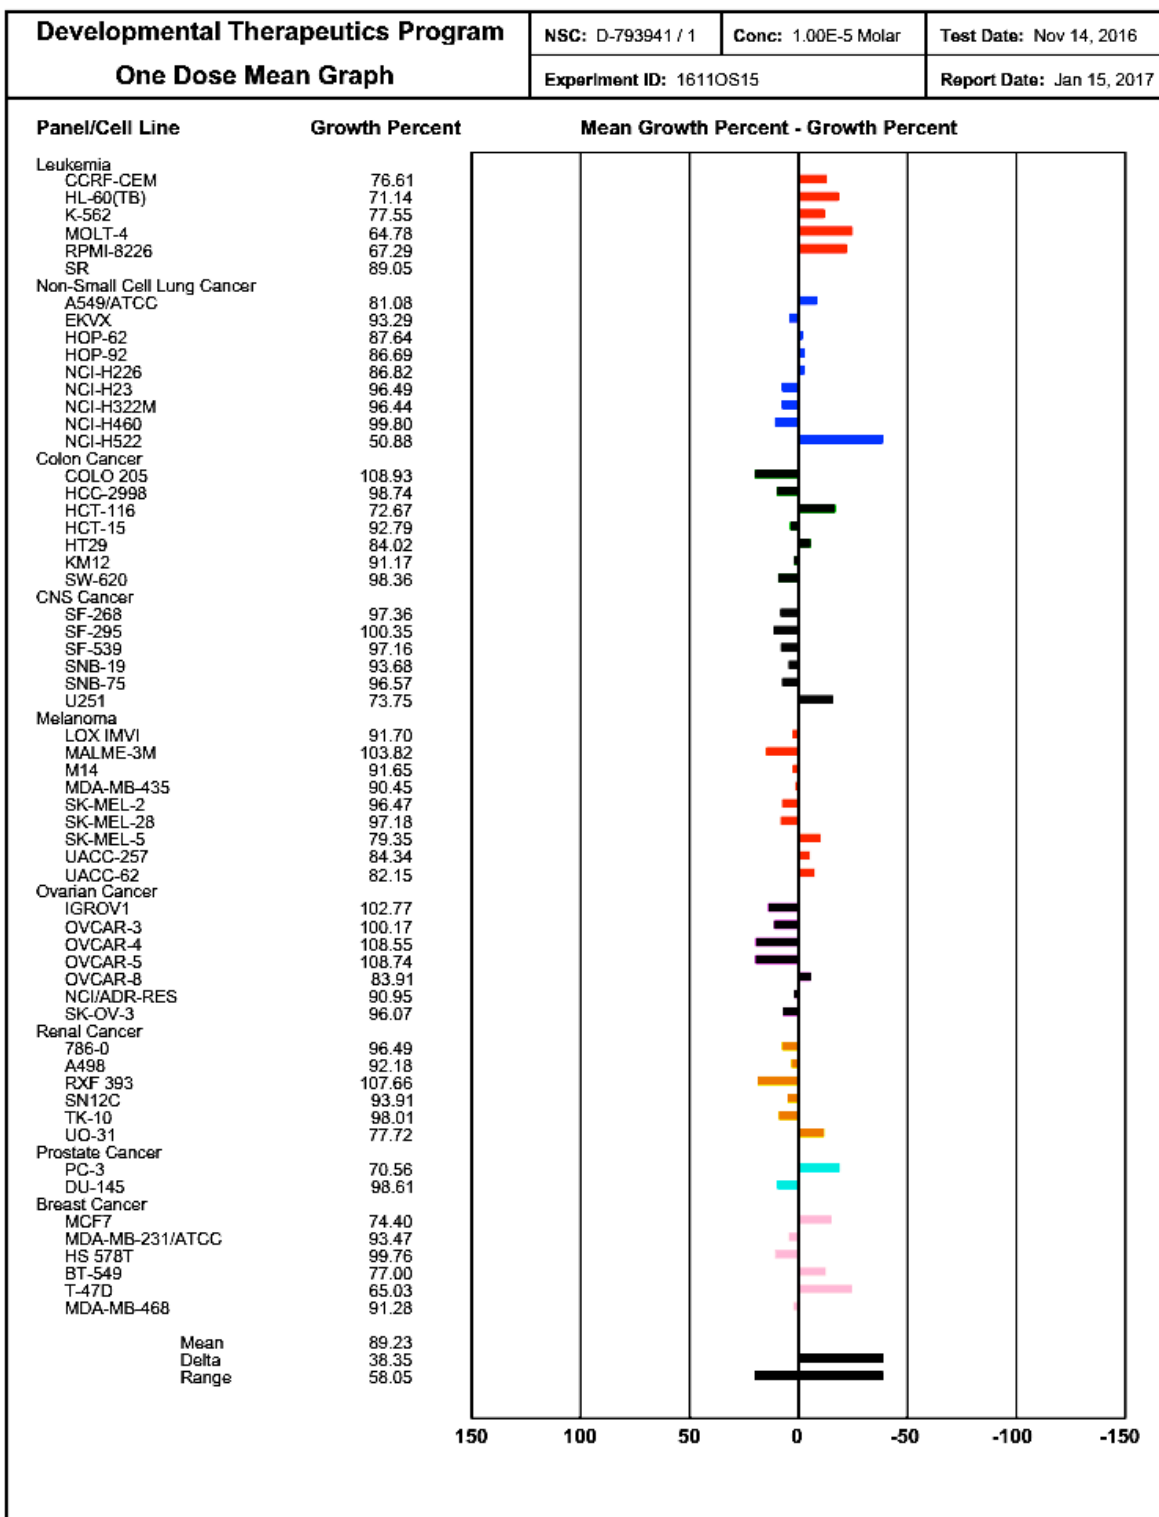

Fig.60. One dose mean graph of nine different cancer cell line panels for compound 81

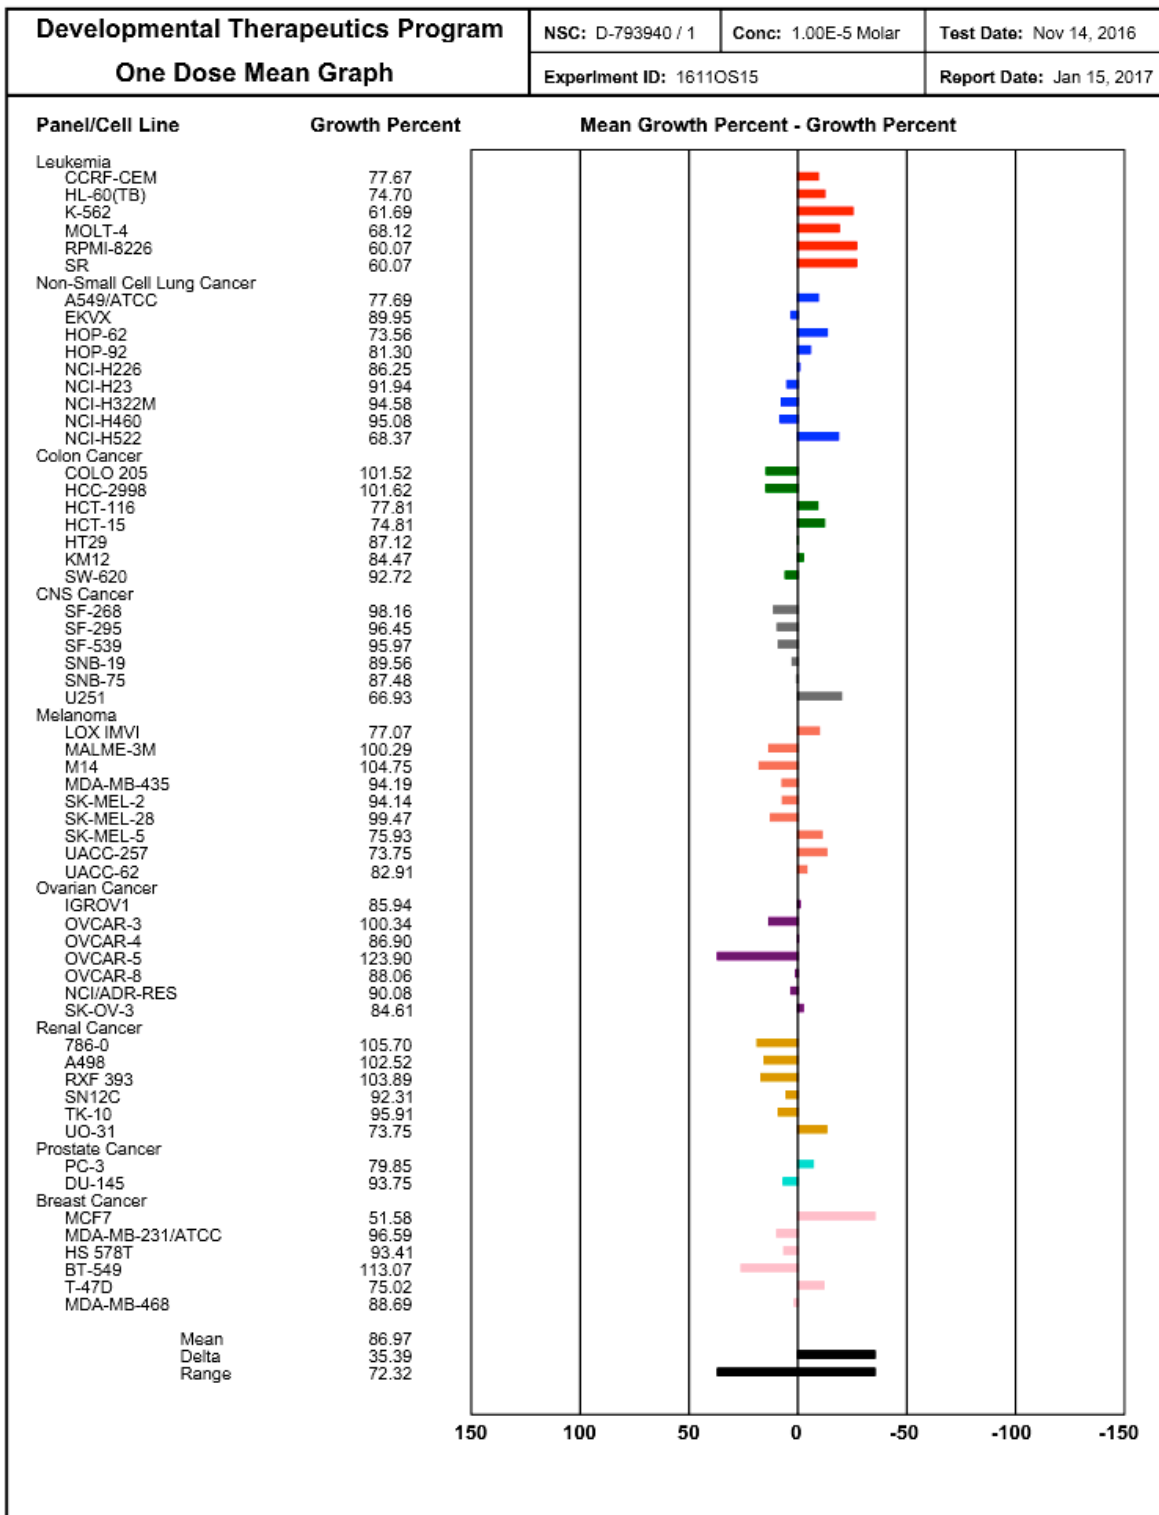

**Fig.61.**One dose mean graph of nine different cancer cell line panels for compound **8m**

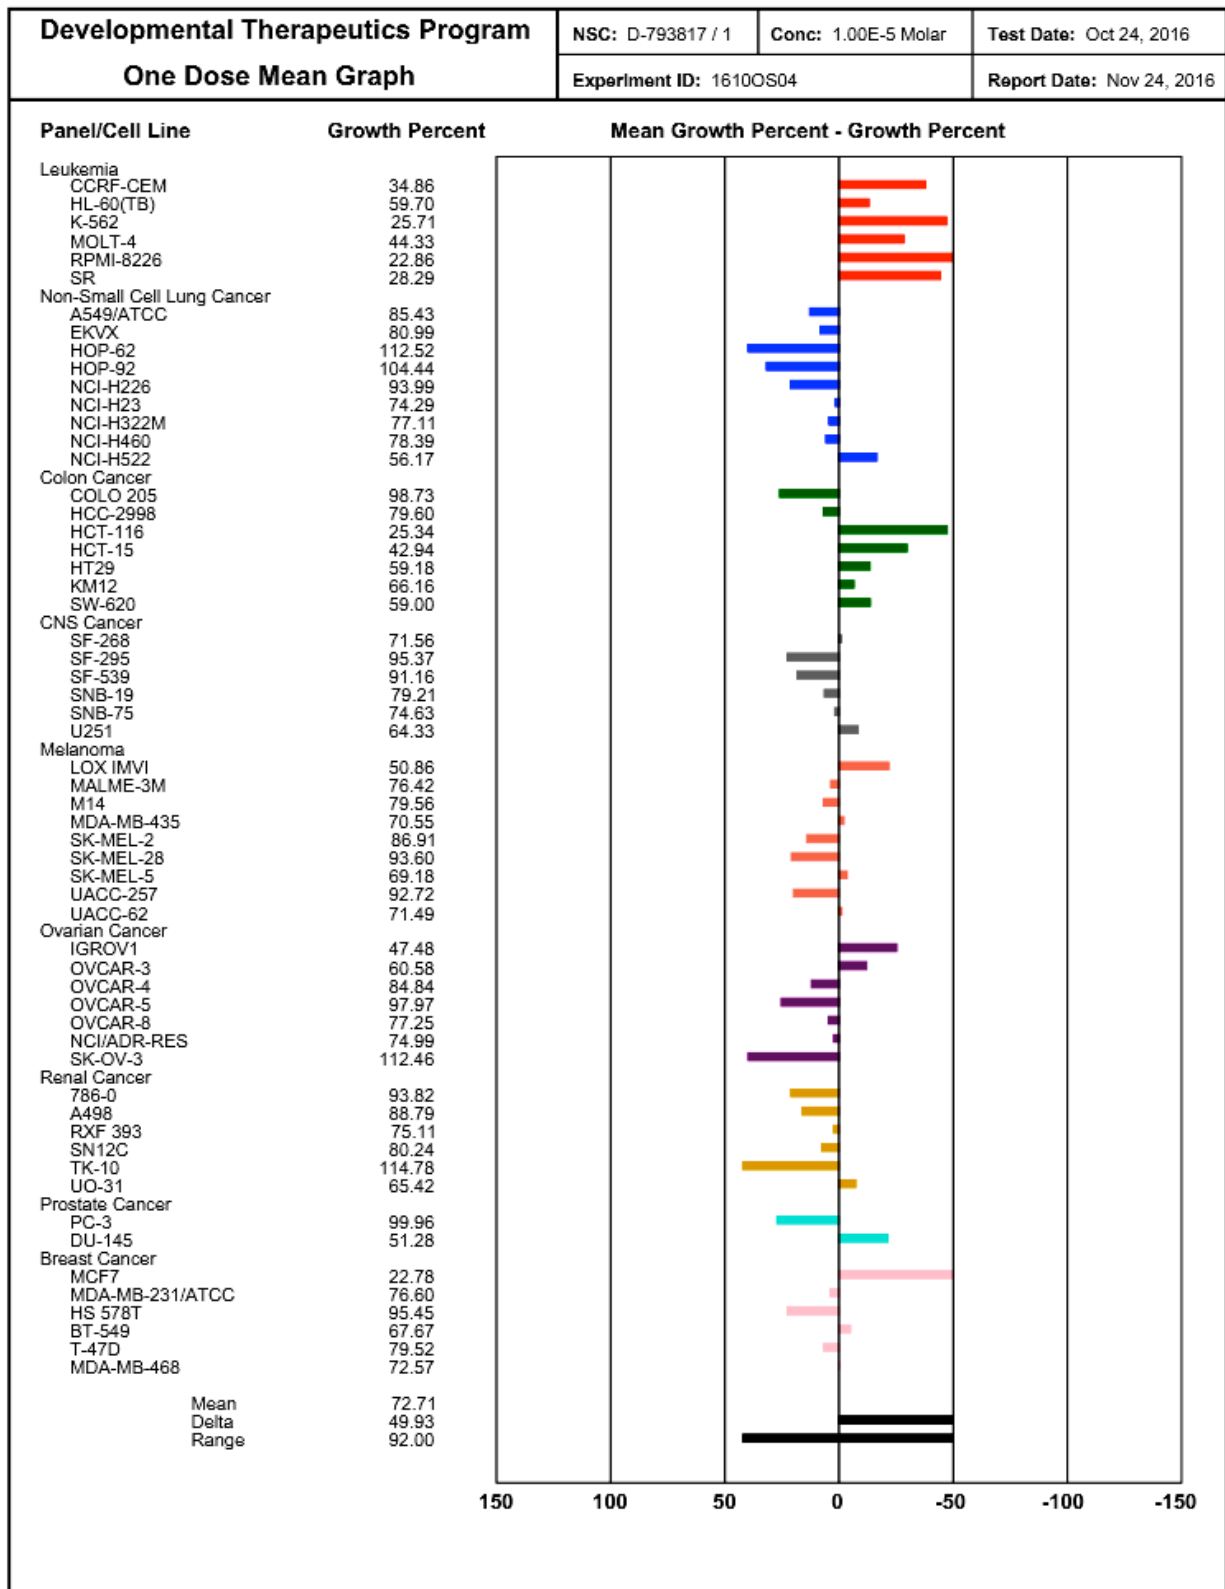

Fig.62. One dose mean graph of nine different cancer cell line panels for compound 8n

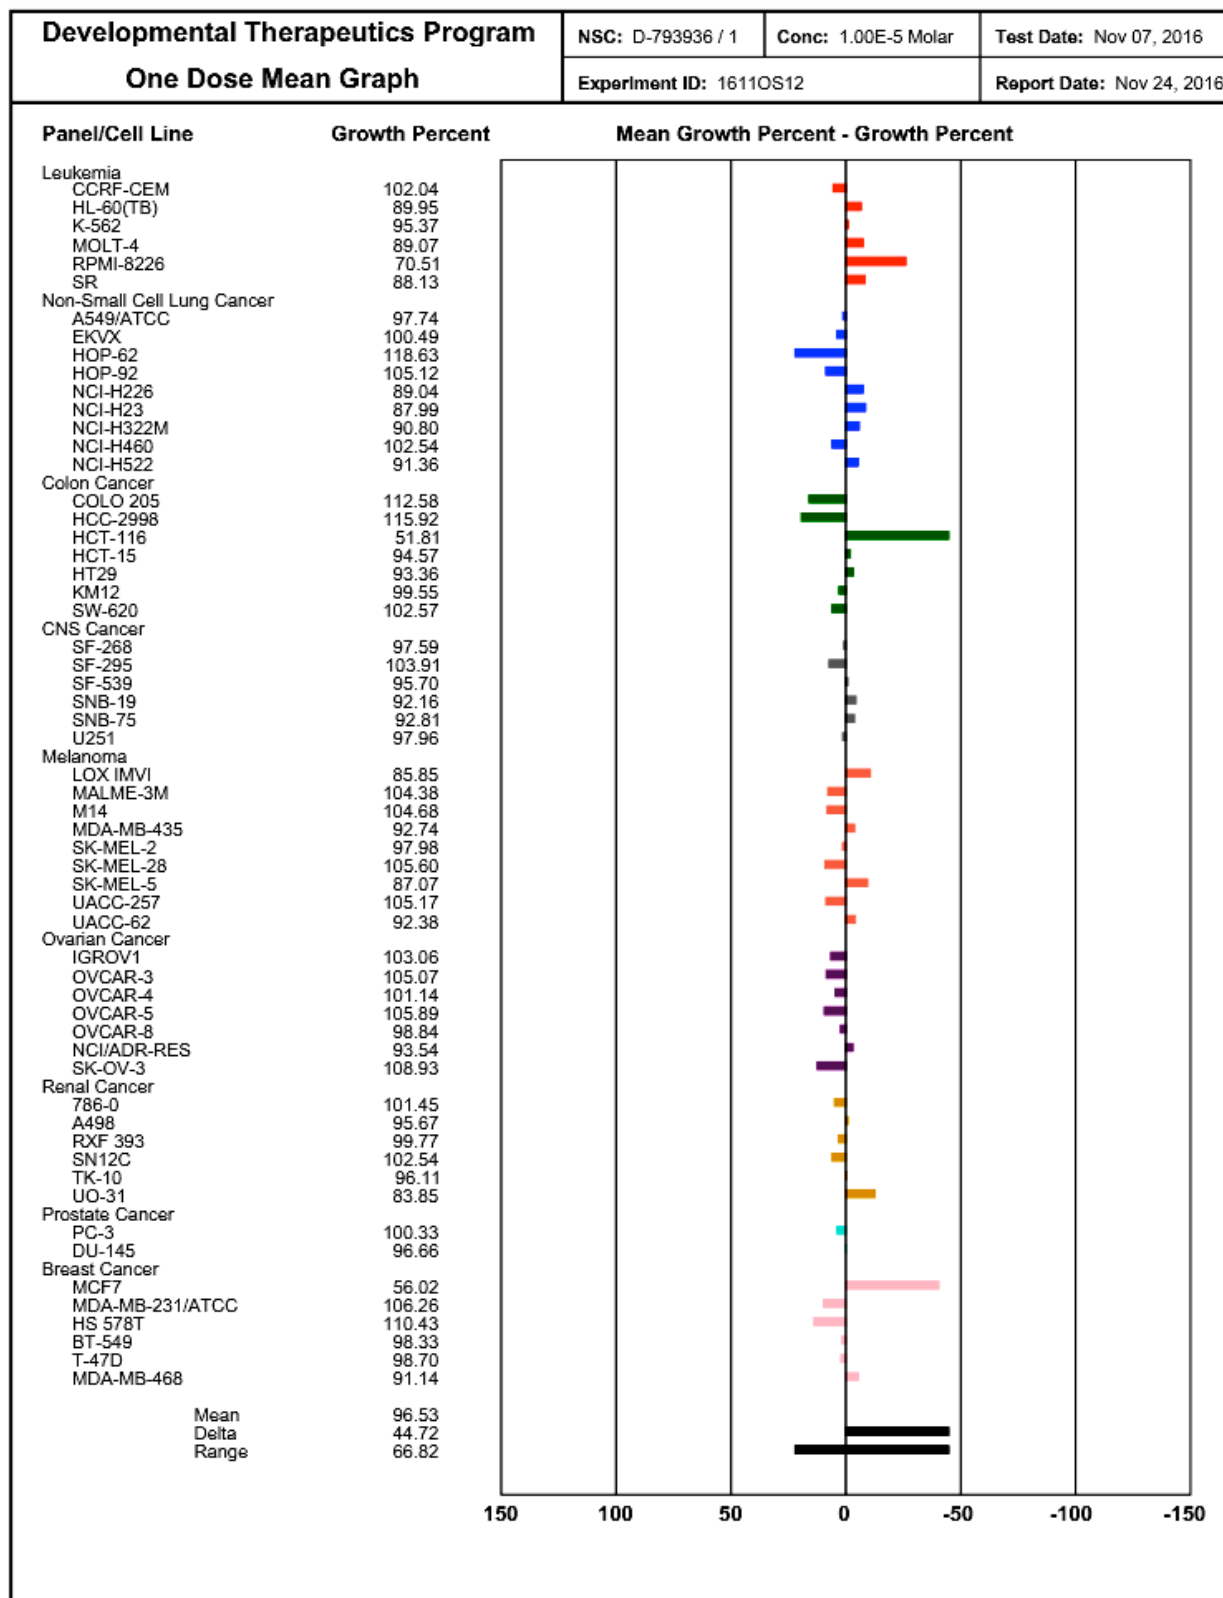

**Fig.63.** One dose mean graph of nine different cancer cell line panels for compound **8o**

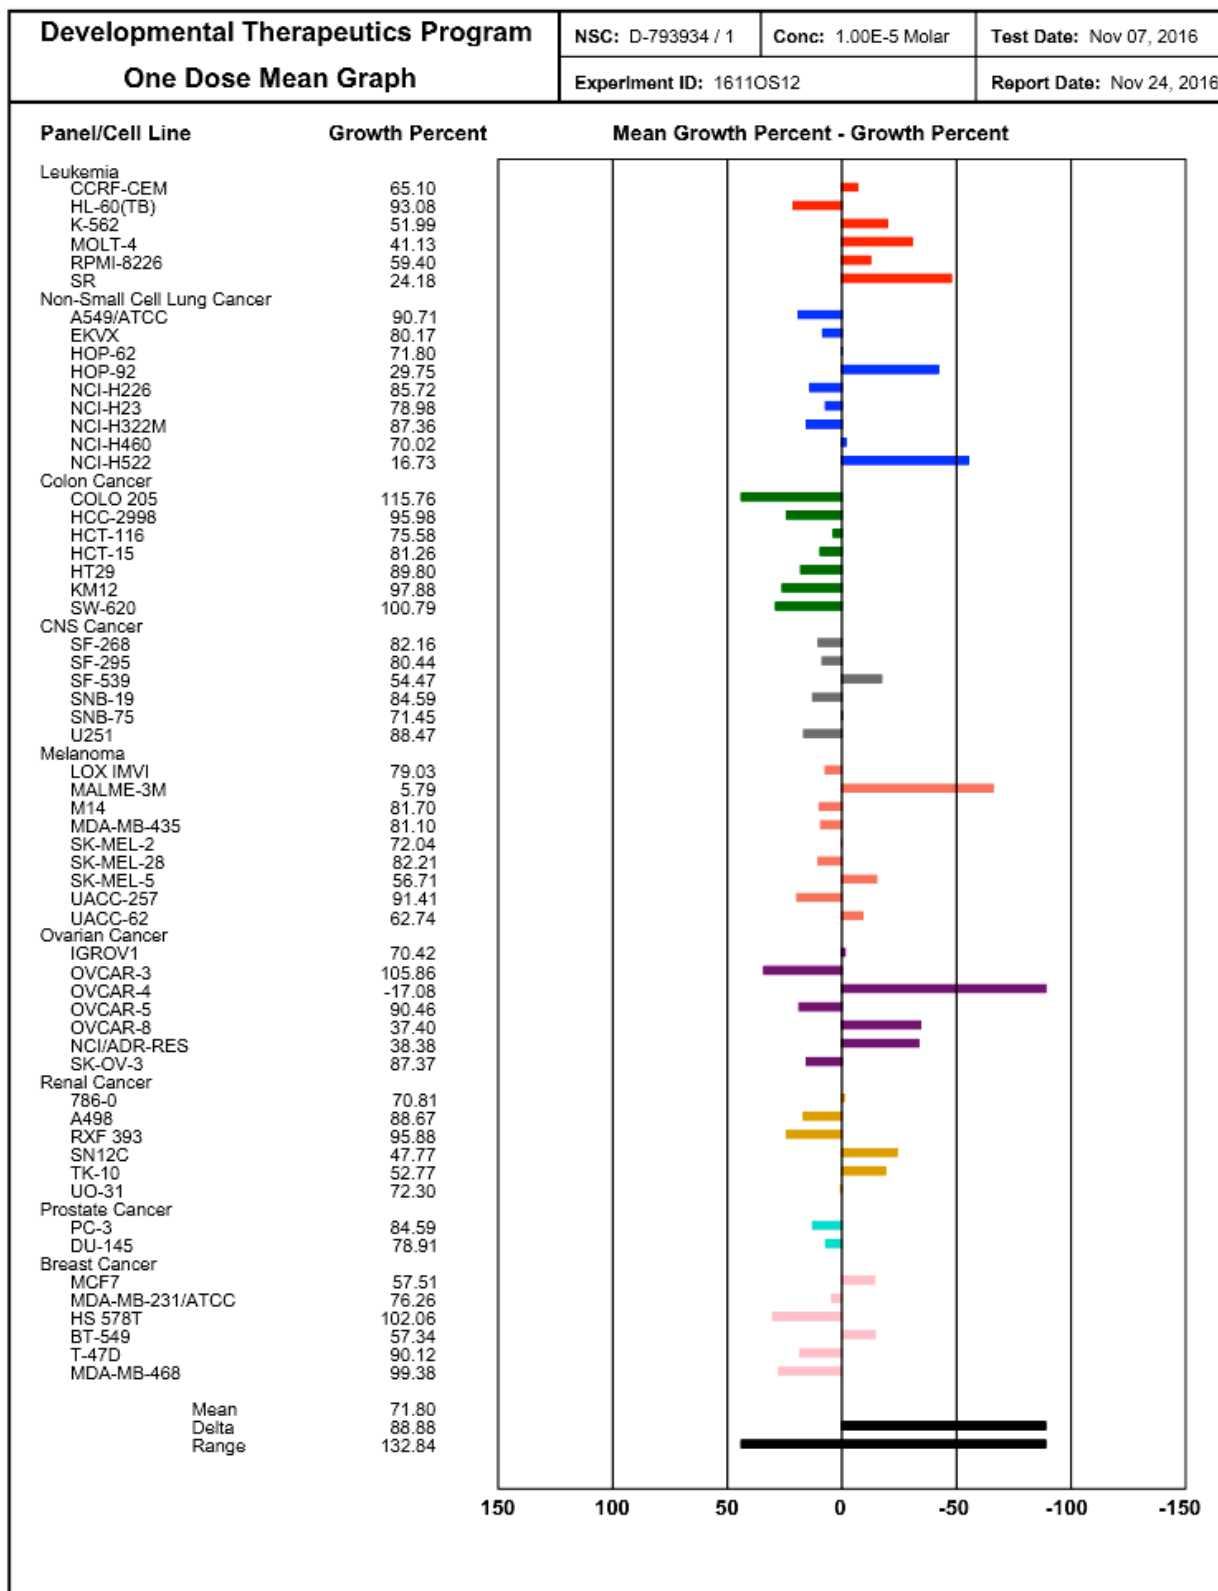

**Fig.64.** One dose mean graph of nine different cancer cell line panels for compound **8p**

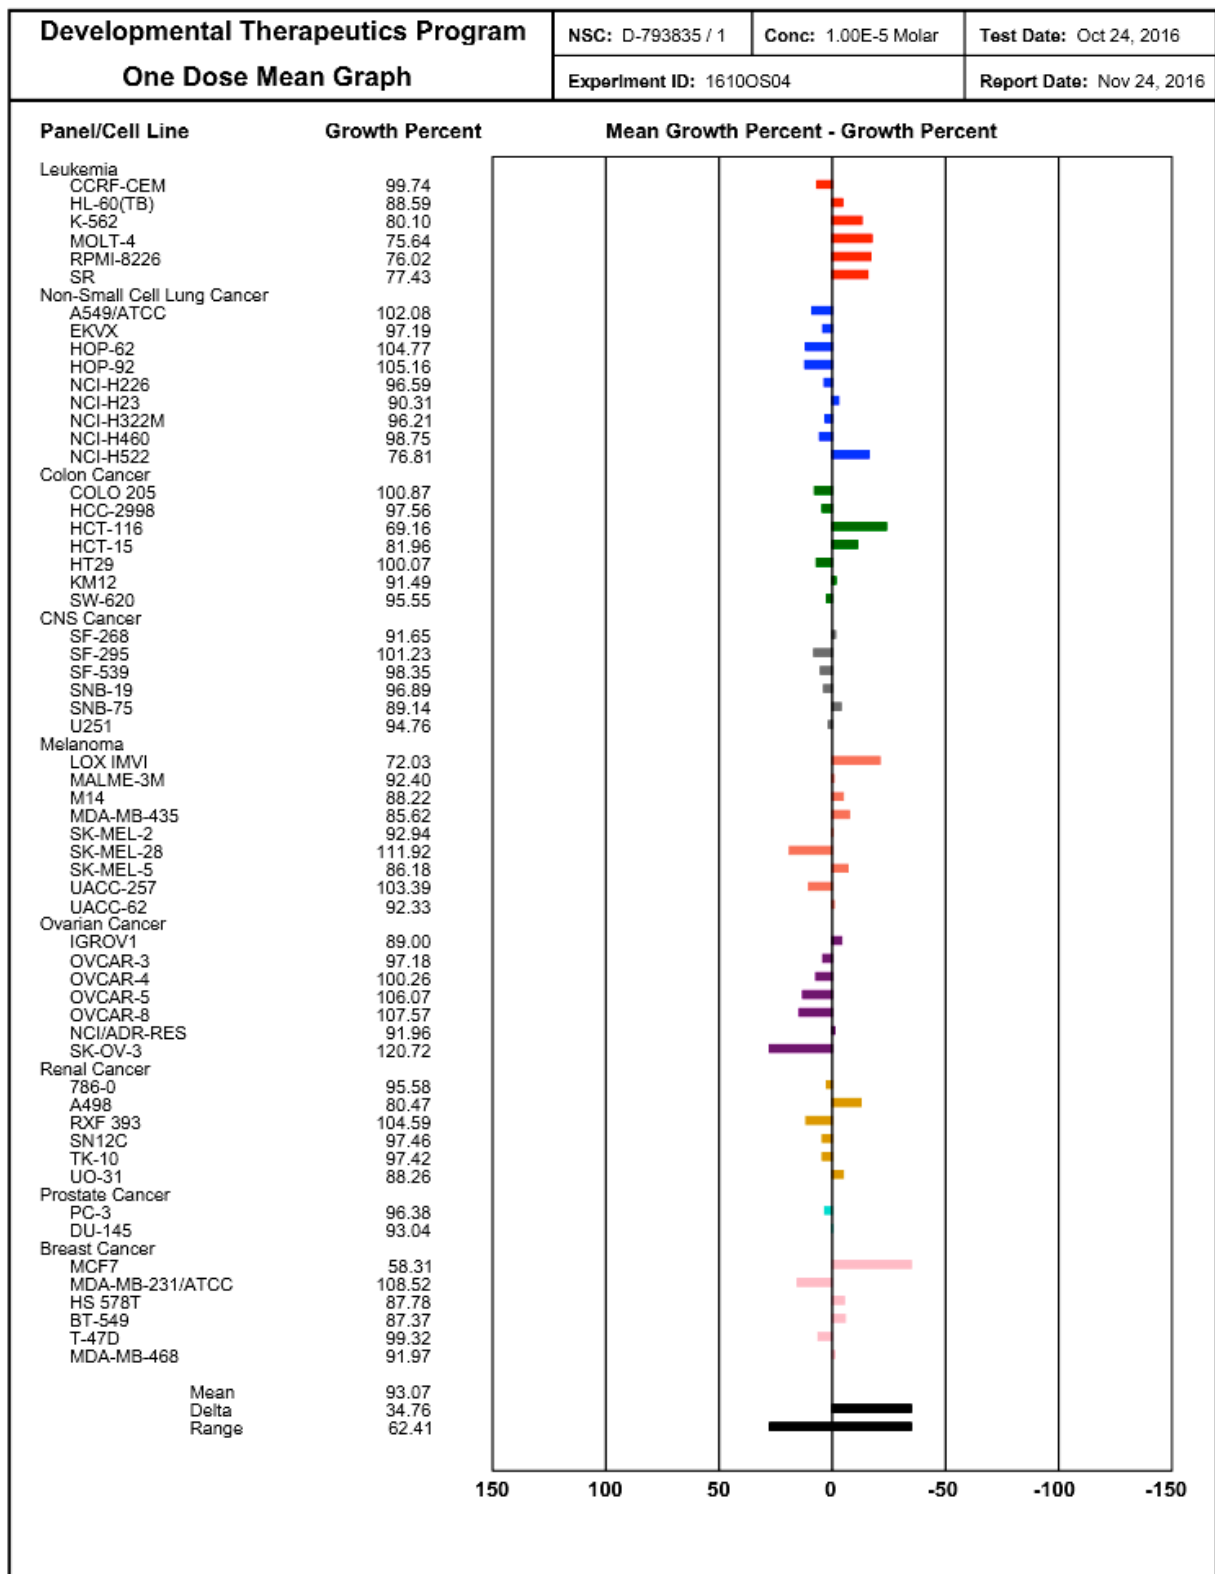

**Fig.65.** One dose mean graph of nine different cancer cell line panels for compound **8q**

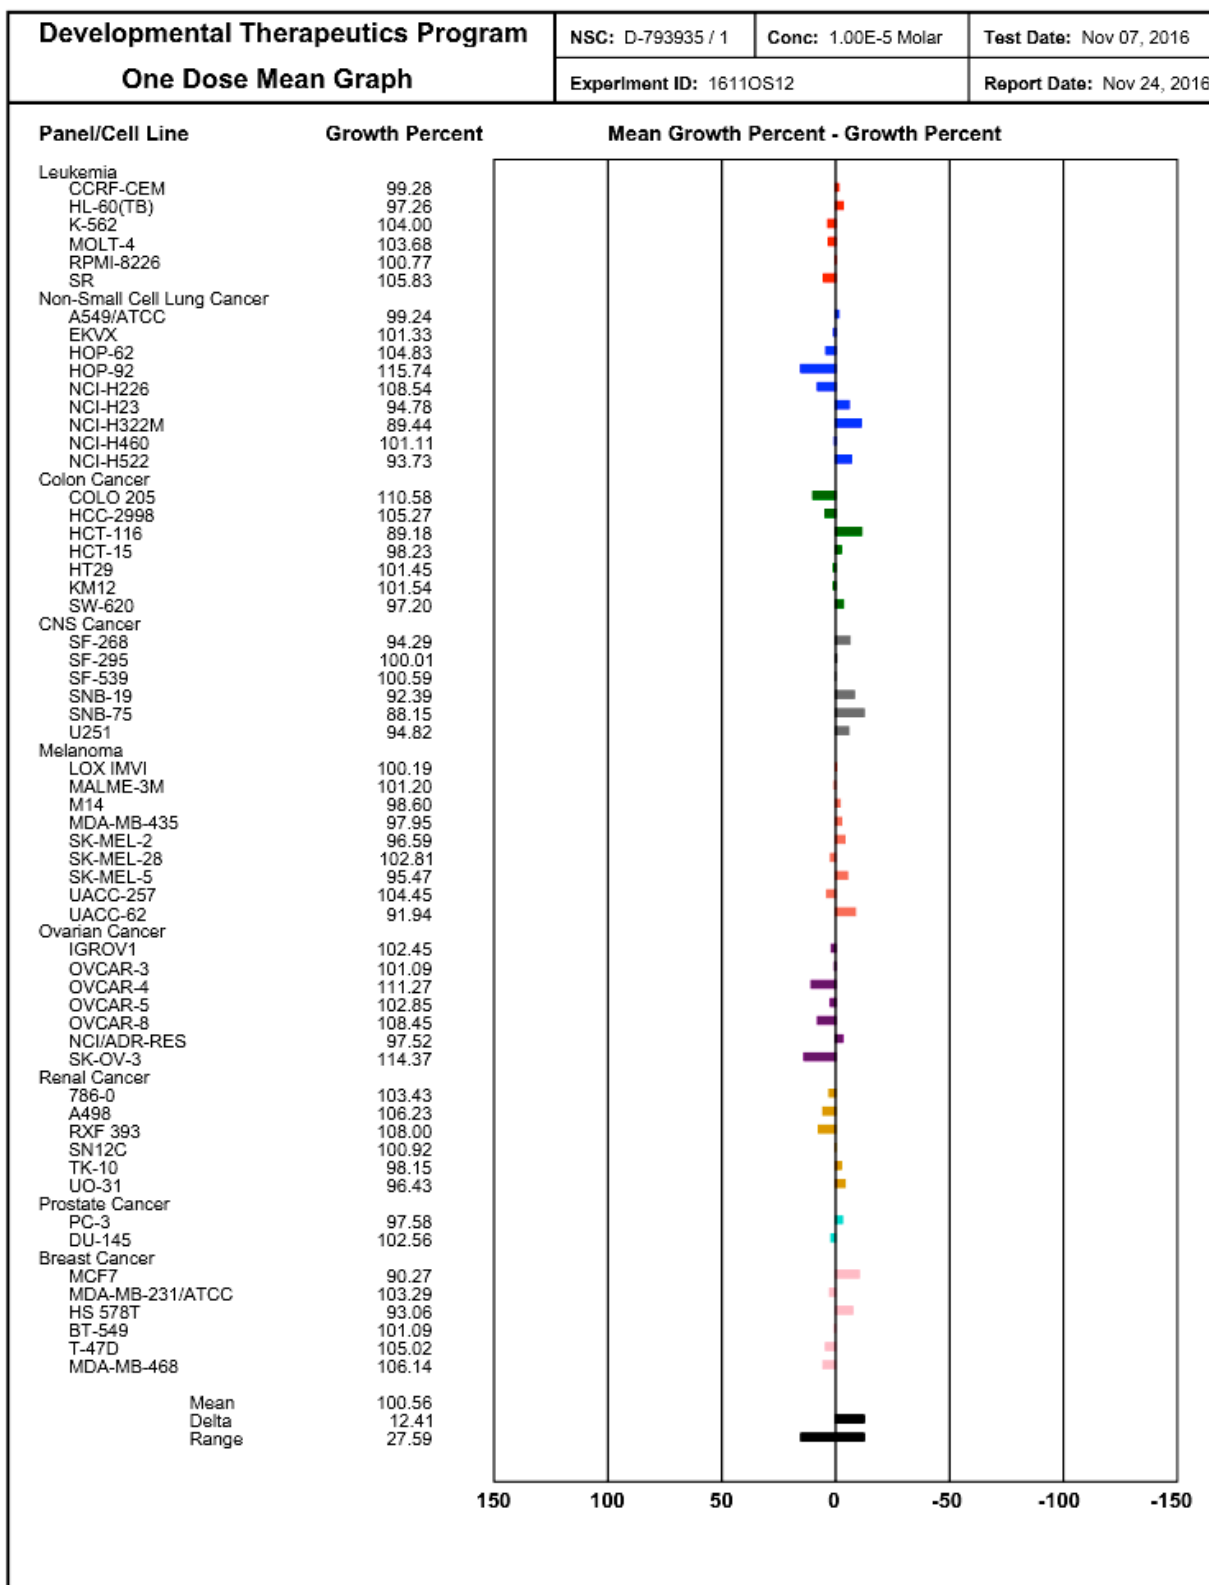

Fig.66. One dose mean graph of nine different cancer cell line panels for compound **8r**



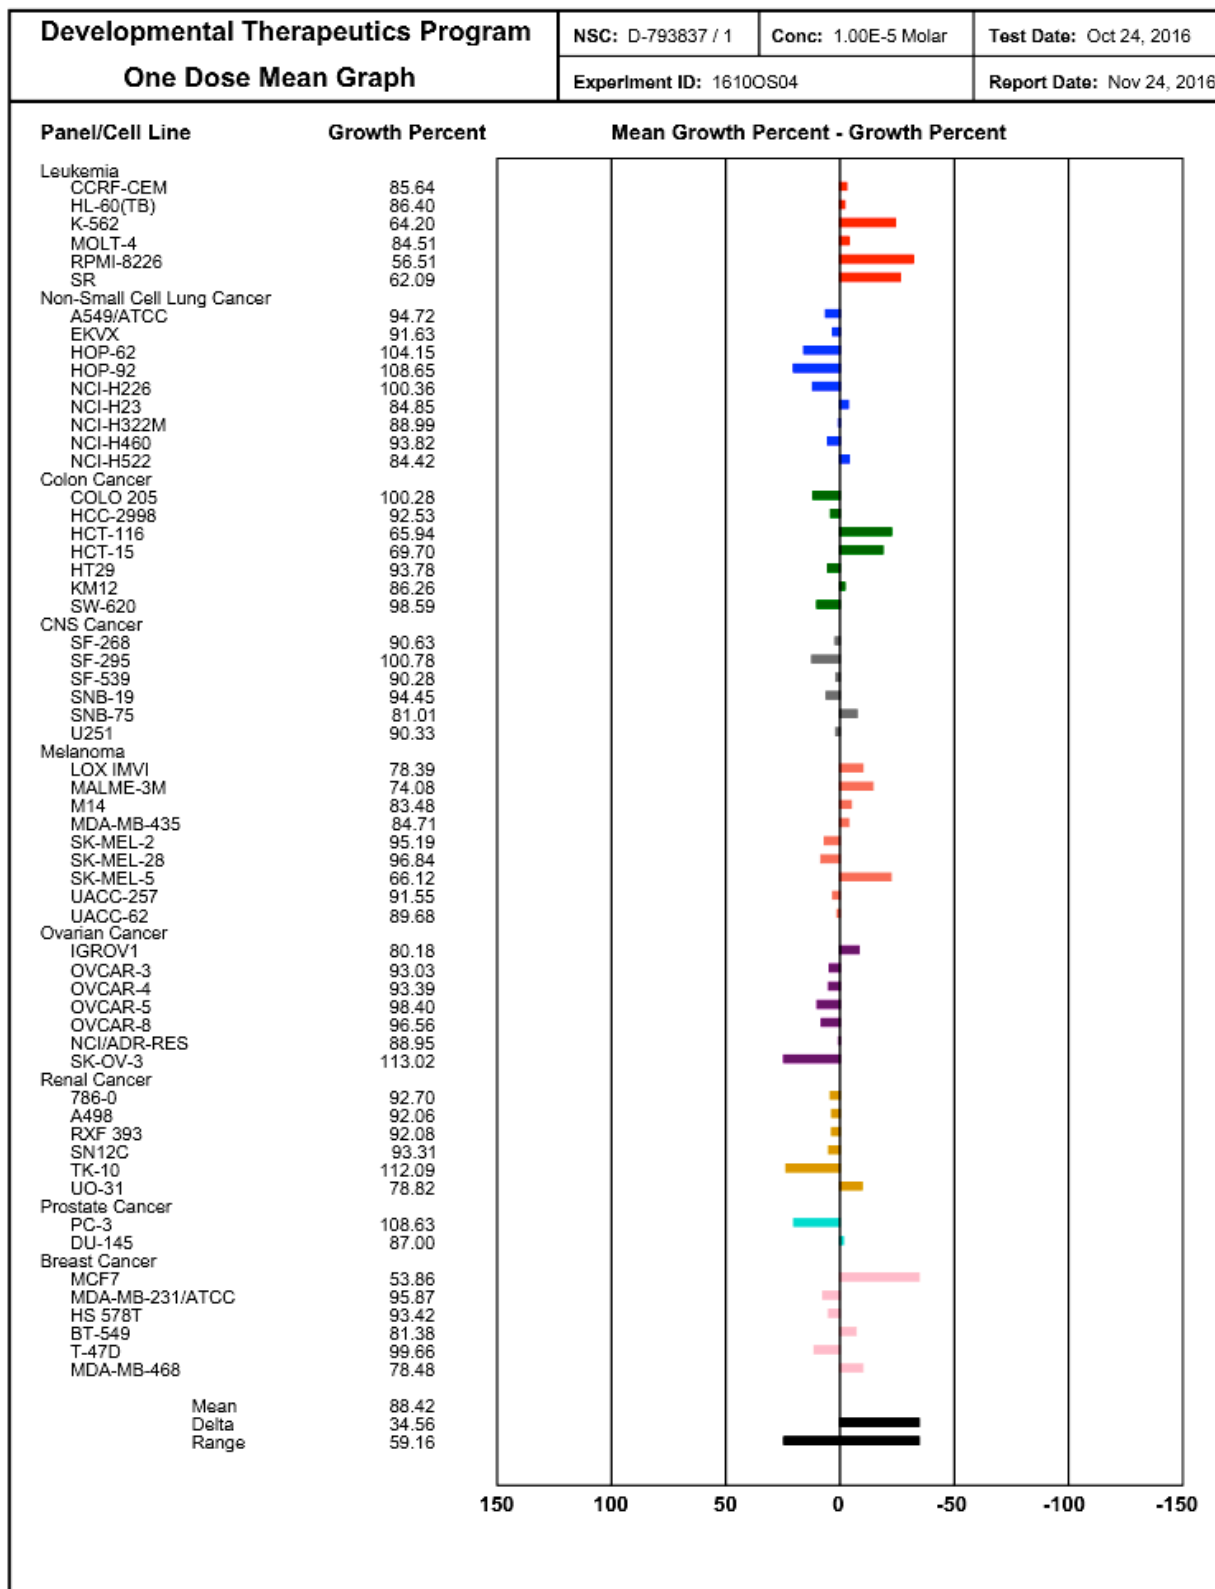

Fig.67. One dose mean graph of nine different cancer cell line panels for compound 8s

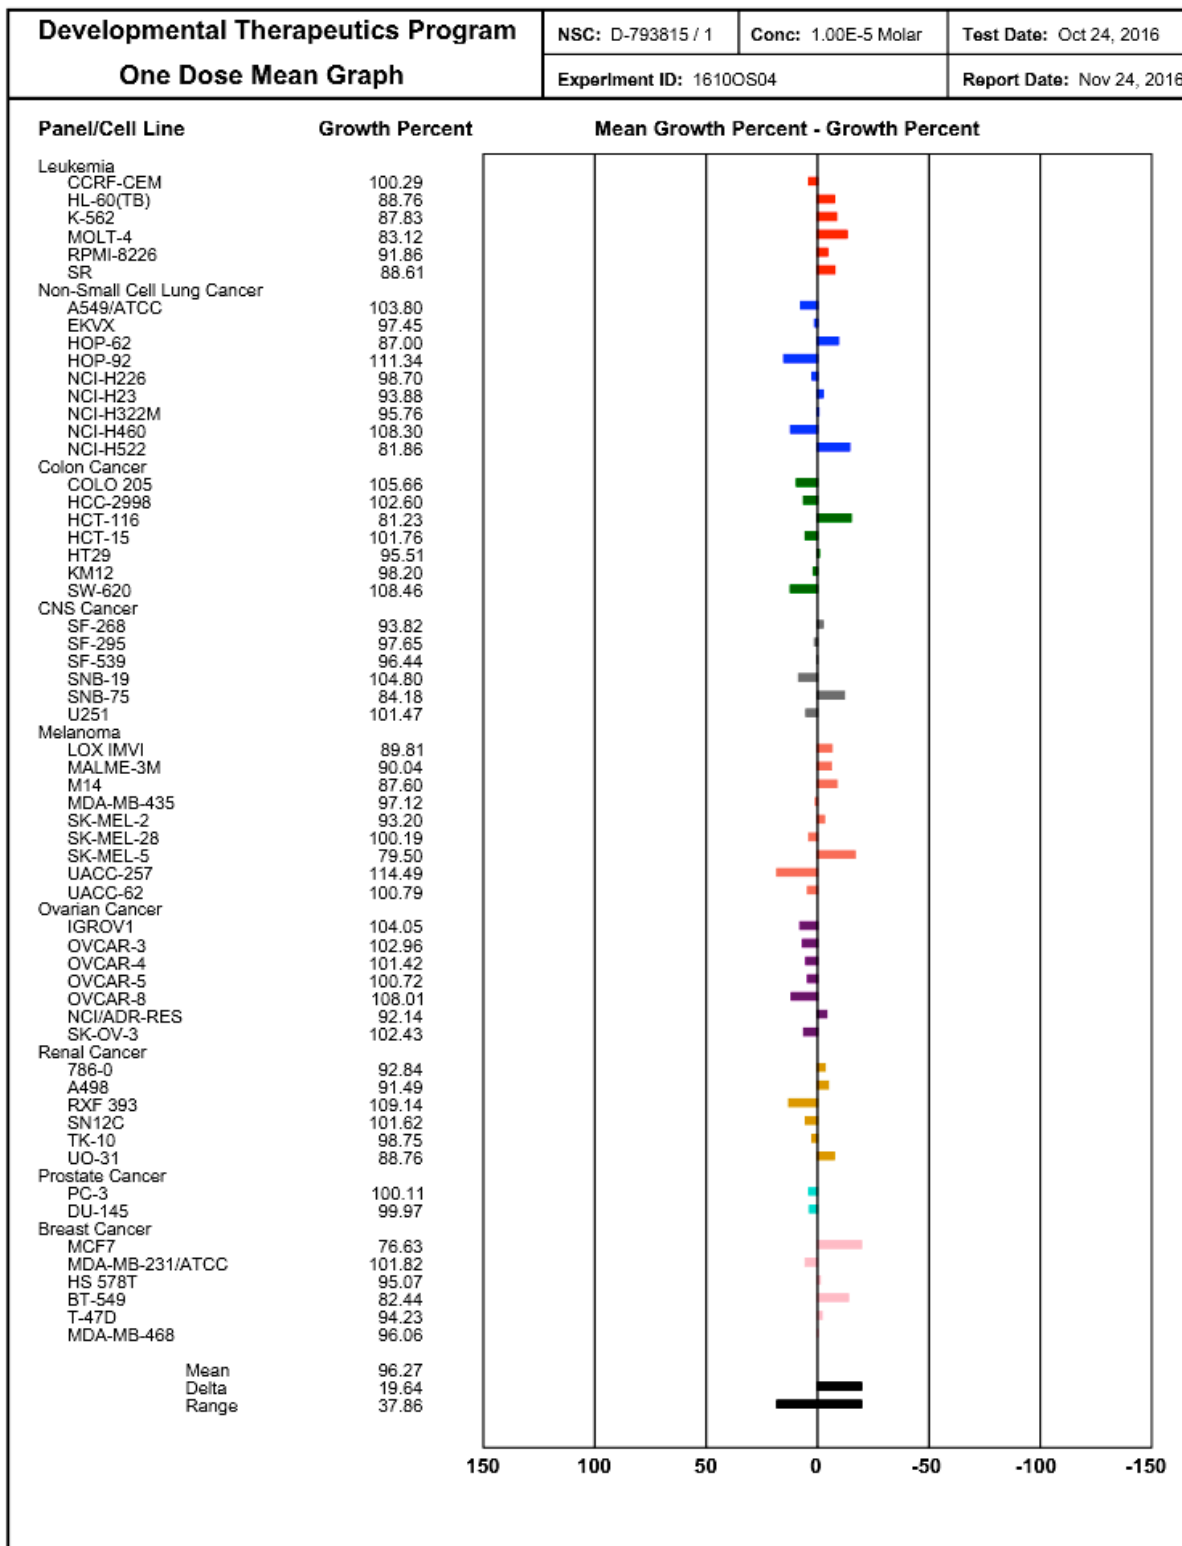

**Fig.68.** One dose mean graph of nine different cancer cell line panels for compound **8t**

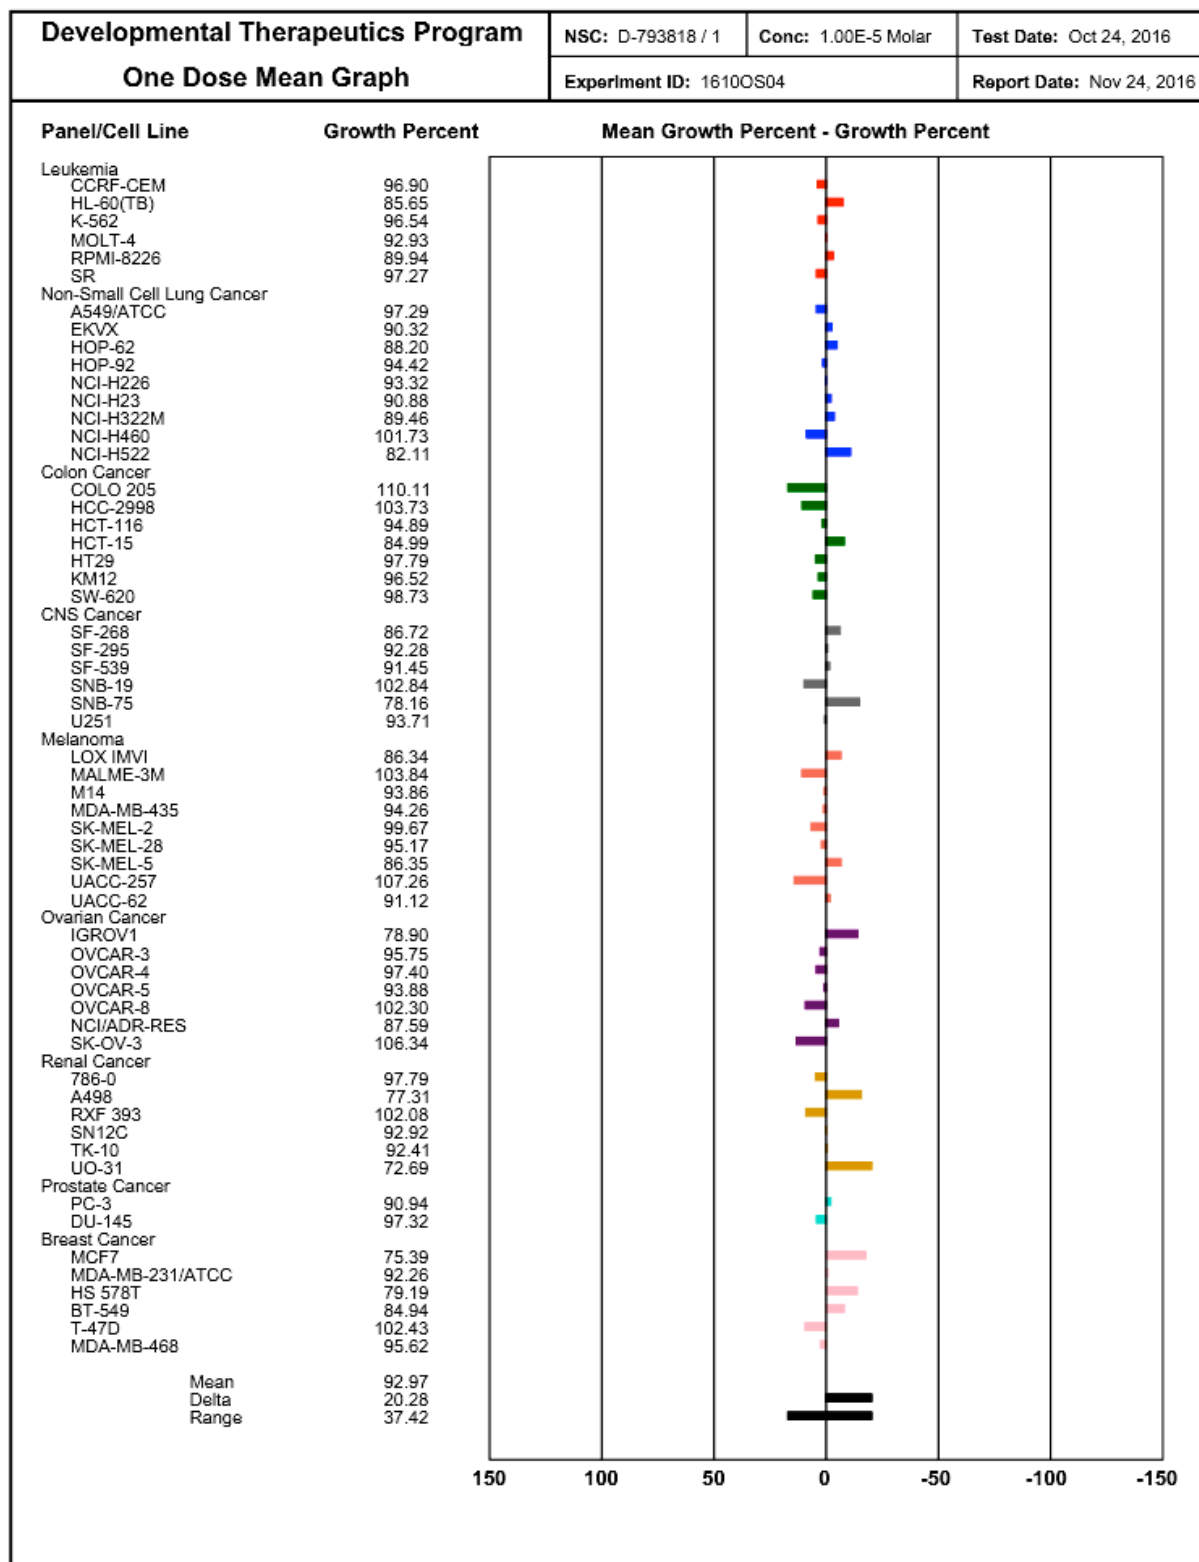

**Fig.69.** One dose mean graph of nine different cancer cell line panels for compound **8u**

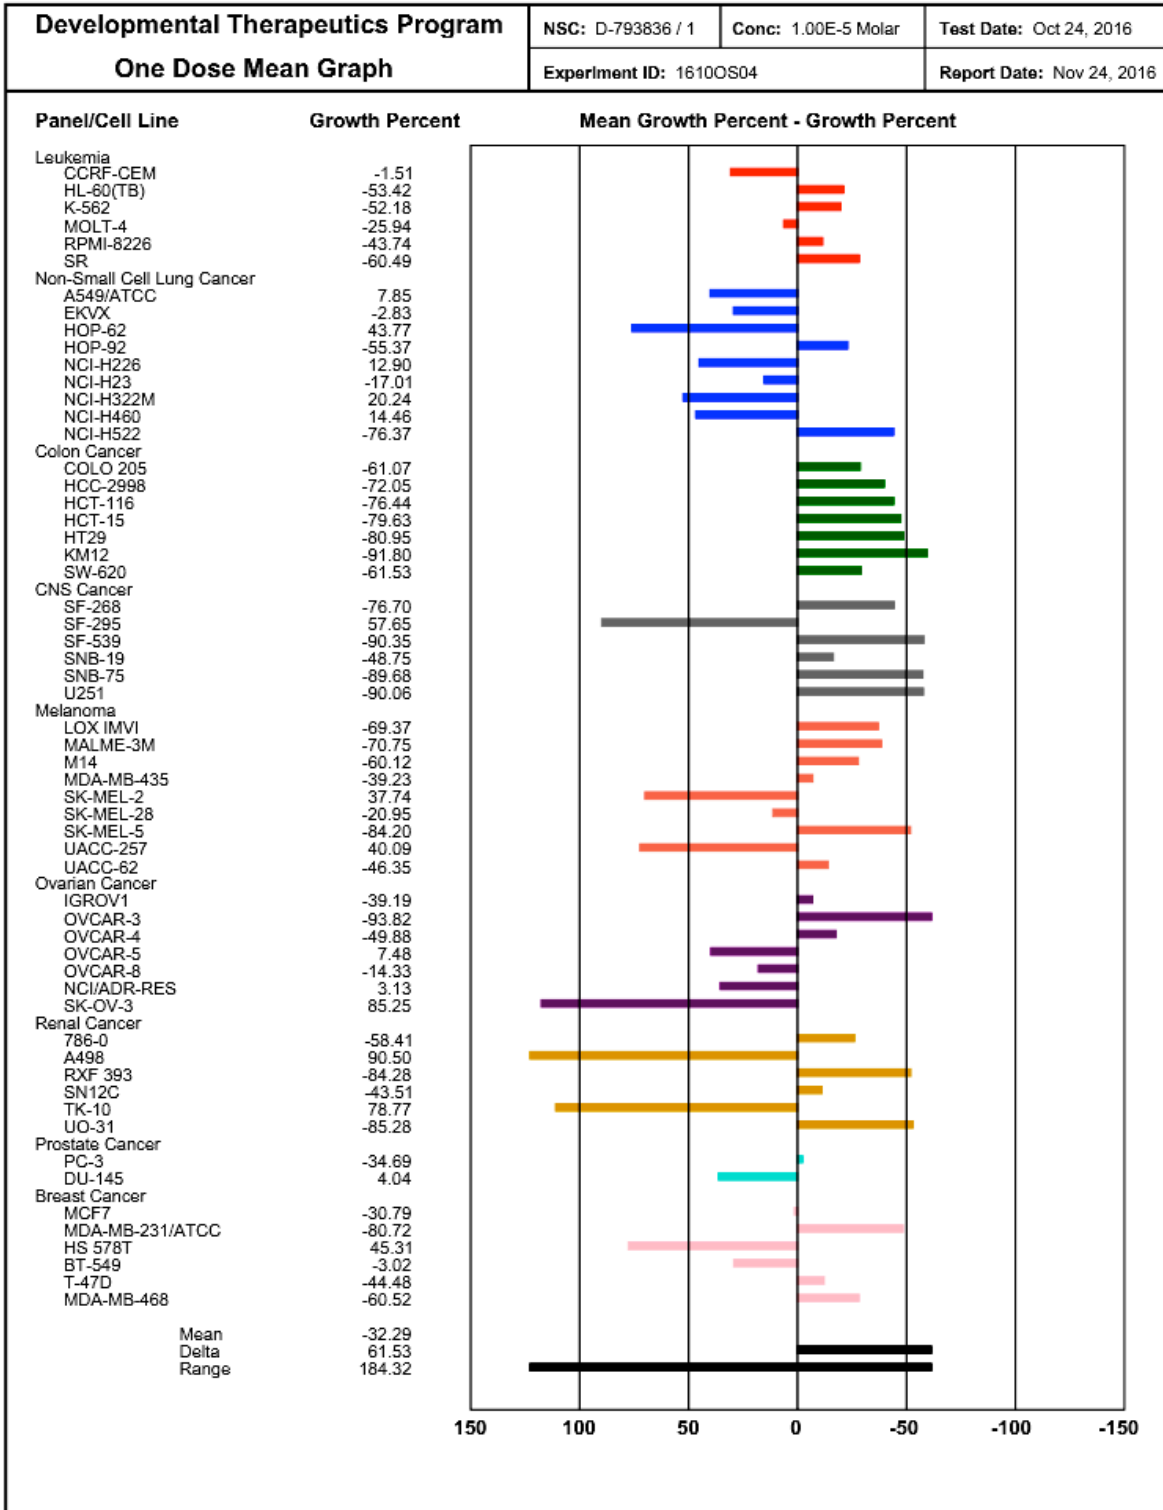

Fig.70. One dose mean graph of nine different cancer cell line panels for compound 8v

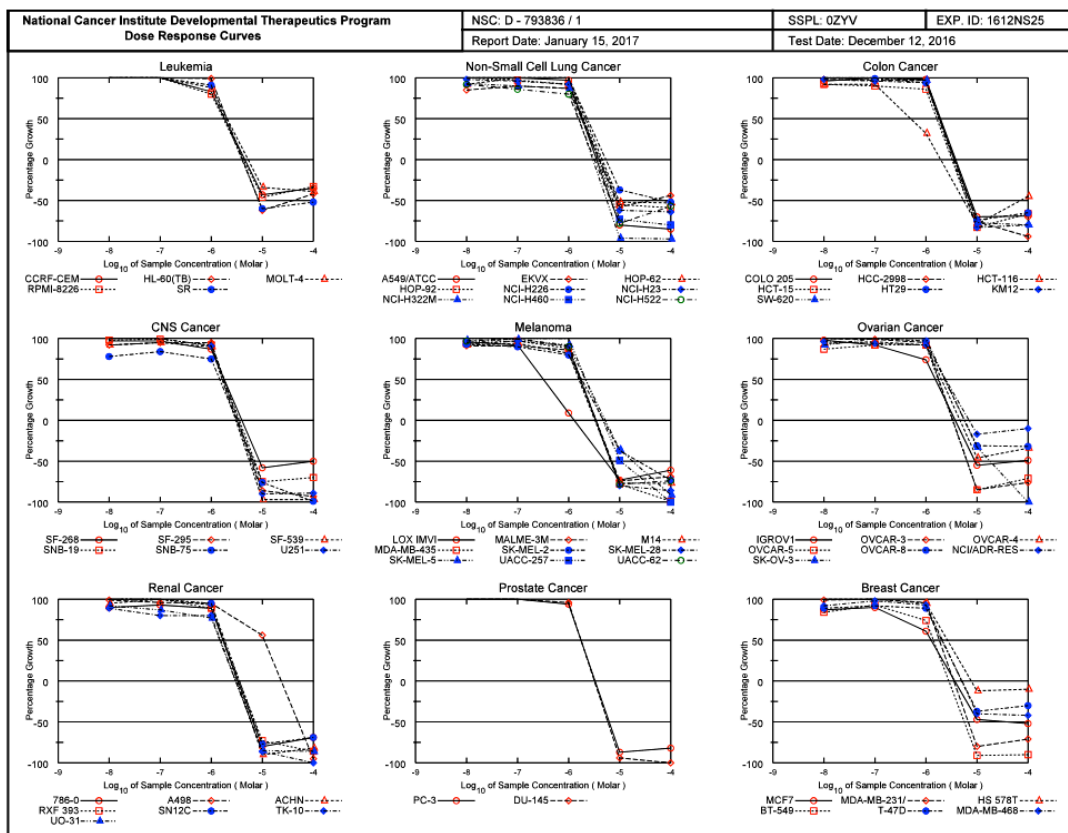

**Fig.71a.** Five dose mean graph of nine different cancer cell line panels for compound 8v

| National Cancer Institute Developmental Therapeutics Program<br>In-Vitro Testing Results |              |       |                                       |       |       |       |        |                |      |      |               |      |         |         |           |
|------------------------------------------------------------------------------------------|--------------|-------|---------------------------------------|-------|-------|-------|--------|----------------|------|------|---------------|------|---------|---------|-----------|
| NSC : D - 793836 / 1                                                                     |              |       | Experiment ID : 1612NS25              |       |       |       |        | Test Type : 08 |      |      | Units : Molar |      |         |         |           |
| Report Date : January 15, 2017                                                           |              |       | Test Date : December 12, 2016         |       |       |       |        | QNS :          |      |      | MC :          |      |         |         |           |
| COMI : CP23                                                                              |              |       | Stain Reagent : SRB Dual-Pass Related |       |       |       |        | SSPL : 0ZYV    |      |      |               |      |         |         |           |
| Panel/Cell Line                                                                          | Time<br>Zero | Ctrl  | Log10 Concentration                   |       |       |       |        | Percent Growth |      |      |               |      | GI50    | TGI     | LC50      |
|                                                                                          |              |       | Mean Optical Densities                |       |       |       |        |                |      |      |               |      |         |         |           |
|                                                                                          |              |       | -8.0                                  | -7.0  | -6.0  | -5.0  | -4.0   | -8.0           | -7.0 | -6.0 | -5.0          | -4.0 |         |         |           |
| <b>Leukemia</b>                                                                          |              |       |                                       |       |       |       |        |                |      |      |               |      |         |         |           |
| CCRF-CEM                                                                                 | 0.571        | 2.502 | 2.600                                 | 2.643 | 2.181 | 0.325 | 0.370  | 105            | 107  | 83   | -43           | -35  | 1.84E-6 | 4.56E-6 | > 1.00E-4 |
| HL-60(TB)                                                                                | 0.963        | 2.703 | 2.726                                 | 2.766 | 2.678 | 0.362 | 0.561  | 101            | 104  | 99   | -62           | -42  | 2.00E-6 | 4.10E-6 |           |
| MOLT-4                                                                                   | 0.675        | 2.260 | 2.503                                 | 2.402 | 2.066 | 0.447 | 0.415  | 115            | 109  | 88   | -34           | -39  | 2.05E-6 | 5.27E-6 | > 1.00E-4 |
| RPMI-8226                                                                                | 0.927        | 2.378 | 2.423                                 | 2.458 | 2.092 | 0.488 | 0.620  | 103            | 105  | 80   | -46           | -33  | 1.73E-6 | 4.31E-6 | > 1.00E-4 |
| SR                                                                                       | 0.618        | 2.052 | 2.133                                 | 2.134 | 1.916 | 0.250 | 0.299  | 106            | 106  | 91   | -60           | -52  | 1.86E-6 | 4.01E-6 | 8.64E-6   |
| <b>Non-Small Cell Lung Cancer</b>                                                        |              |       |                                       |       |       |       |        |                |      |      |               |      |         |         |           |
| A549/ATCC                                                                                | 0.273        | 1.521 | 1.536                                 | 1.516 | 1.482 | 0.055 | 0.042  | 101            | 100  | 97   | -80           | -85  | 1.84E-6 | 3.53E-6 | 6.78E-6   |
| EKVX                                                                                     | 0.714        | 1.997 | 2.069                                 | 2.014 | 0.302 | 0.403 |        | 85             | 90   | 87   | -58           | -44  | 1.79E-6 | 3.98E-6 |           |
| HOP-62                                                                                   | 0.628        | 1.918 | 1.809                                 | 1.915 | 1.919 | 0.299 | 0.298  | 92             | 100  | 100  | -52           | -53  | 2.13E-6 | 4.53E-6 | 9.63E-6   |
| HOP-92                                                                                   | 0.913        | 1.385 | 1.390                                 | 1.373 | 1.347 | 0.412 | 0.375  | 101            | 97   | 92   | -55           | -59  | 1.93E-6 | 4.23E-6 | 9.26E-6   |
| NCI-H226                                                                                 | 0.761        | 1.523 | 1.551                                 | 1.580 | 1.636 | 0.478 | 0.363  | 104            | 107  | 115  | -37           | -52  | 2.67E-6 | 5.69E-6 | 6.97E-5   |
| NCI-H23                                                                                  | 0.663        | 2.117 | 2.082                                 | 2.055 | 2.001 | 0.254 | 0.242  | 98             | 96   | 92   | -62           | -64  | 1.88E-6 | 3.97E-6 | 8.39E-6   |
| NCI-H322M                                                                                | 0.664        | 1.865 | 1.781                                 | 1.747 | 1.707 | 0.024 | 0.022  | 93             | 90   | 87   | -96           | -97  | 1.59E-6 | 2.98E-6 | 5.58E-6   |
| NCI-H460                                                                                 | 0.278        | 2.768 | 2.875                                 | 2.932 | 2.840 | 0.076 | 0.056  | 104            | 107  | 103  | -73           | -80  | 2.00E-6 | 3.85E-6 | 7.41E-6   |
| NCI-H522                                                                                 | 1.079        | 2.640 | 2.512                                 | 2.429 | 2.325 | 0.243 | 0.463  | 92             | 86   | 80   | -78           | -57  | 1.55E-6 | 3.21E-6 | 6.68E-6   |
| <b>Colon Cancer</b>                                                                      |              |       |                                       |       |       |       |        |                |      |      |               |      |         |         |           |
| COLO 205                                                                                 | 0.429        | 1.592 | 1.549                                 | 1.590 | 1.572 | 0.129 | 0.133  | 96             | 100  | 98   | -70           | -69  | 1.94E-6 | 3.84E-6 | 7.61E-6   |
| HCC-2998                                                                                 | 1.101        | 3.129 | 3.089                                 | 3.074 | 3.076 | 0.267 | 0.069  | 98             | 97   | 97   | -76           | -94  | 1.88E-6 | 3.65E-6 | 7.10E-6   |
| HCT-116                                                                                  | 0.212        | 1.862 | 1.725                                 | 1.732 | 0.739 | 0.045 | 0.117  | 92             | 92   | 32   | -79           | -45  | 5.01E-7 | 1.94E-6 |           |
| HCT-15                                                                                   | 0.335        | 1.899 | 1.770                                 | 1.739 | 1.673 | 0.057 | 0.113  | 92             | 90   | 86   | -83           | -66  | 1.63E-6 | 3.22E-6 | 6.37E-6   |
| HT29                                                                                     | 0.308        | 1.881 | 1.902                                 | 1.871 | 1.786 | 0.080 | 0.107  | 101            | 99   | 94   | -74           | -65  | 1.83E-6 | 3.62E-6 | 7.18E-6   |
| KM12                                                                                     | 0.603        | 3.117 | 3.071                                 | 3.023 | 2.961 | 0.105 | 0.124  | 98             | 96   | 94   | -83           | -80  | 1.77E-6 | 3.40E-6 | 6.53E-6   |
| SW-620                                                                                   | 0.335        | 2.320 | 2.352                                 | 2.383 | 2.255 | 0.076 | 0.069  | 102            | 103  | 97   | -77           | -80  | 1.86E-6 | 3.60E-6 | 6.97E-6   |
| <b>CNS Cancer</b>                                                                        |              |       |                                       |       |       |       |        |                |      |      |               |      |         |         |           |
| SF-268                                                                                   | 0.715        | 2.267 | 2.227                                 | 2.219 | 2.061 | 0.299 | 0.355  | 97             | 97   | 87   | -58           | -50  | 1.79E-6 | 3.96E-6 | 8.77E-6   |
| SF-265                                                                                   | 0.662        | 2.828 | 2.650                                 | 2.725 | 2.718 | 0.095 | 0.045  | 92             | 95   | 95   | -88           | -93  | 1.77E-6 | 3.35E-6 | 6.34E-6   |
| SF-539                                                                                   | 0.896        | 2.658 | 2.525                                 | 2.573 | 2.489 | 0.026 | 0.028  | 92             | 95   | 90   | -97           | -97  | 1.64E-6 | 3.03E-6 | 5.61E-6   |
| SNB-19                                                                                   | 0.492        | 2.074 | 2.042                                 | 2.061 | 1.942 | 0.125 | 0.148  | 98             | 99   | 92   | -75           | -70  | 1.78E-6 | 3.56E-6 | 7.11E-6   |
| SNB-75                                                                                   | 1.231        | 2.168 | 1.966                                 | 2.018 | 1.937 | 0.300 | 0.011  | 78             | 84   | 75   | -76           | -89  | 1.47E-6 | 3.15E-6 | 6.76E-6   |
| U251                                                                                     | 0.352        | 1.657 | 1.657                                 | 1.678 | 1.538 | 0.035 | 0.038  | 100            | 102  | 91   | -90           | -89  | 1.68E-6 | 3.18E-6 | 6.00E-6   |
| <b>Melanoma</b>                                                                          |              |       |                                       |       |       |       |        |                |      |      |               |      |         |         |           |
| LOX IMVI                                                                                 | 0.319        | 2.302 | 2.225                                 | 2.145 | 0.493 | 0.088 | 0.126  | 96             | 92   | 9    | -73           | -61  | 3.20E-7 | 1.28E-6 | 5.28E-6   |
| MALME-3M                                                                                 | 0.741        | 1.451 | 1.384                                 | 1.385 | 1.354 | 0.192 | 0.228  | 91             | 91   | 86   | -74           | -69  | 1.68E-6 | 3.45E-6 | 7.08E-6   |
| M14                                                                                      | 0.503        | 2.008 | 1.887                                 | 1.918 | 1.742 | 0.118 | 0.116  | 92             | 94   | 82   | -77           | -77  | 1.60E-6 | 3.30E-6 | 6.80E-6   |
| MDA-MB-435                                                                               | 0.510        | 2.495 | 2.380                                 | 2.438 | 2.261 | 0.114 | 0.005  | 94             | 97   | 88   | -78           | -99  | 1.70E-6 | 3.40E-6 | 6.81E-6   |
| SK-MEL-2                                                                                 | 0.959        | 2.657 | 2.545                                 | 2.486 | 2.311 | 0.604 | 0.257  | 93             | 90   | 80   | -37           | -73  | 1.79E-6 | 4.82E-6 | 2.28E-5   |
| SK-MEL-28                                                                                | 0.762        | 2.374 | 2.263                                 | 2.318 | 2.234 | 0.150 | 0.105  | 93             | 97   | 91   | -80           | -86  | 1.74E-6 | 3.40E-6 | 6.65E-6   |
| SK-MEL-5                                                                                 | 0.705        | 2.790 | 2.744                                 | 2.772 | 2.633 | 0.451 | 0.061  | 98             | 99   | 92   | -36           | -91  | 2.14E-6 | 5.24E-6 | 1.79E-5   |
| UACC-257                                                                                 | 1.184        | 2.539 | 2.473                                 | 2.548 | 2.533 | 0.607 | -0.024 | 95             | 101  | 100  | -49           | -100 | 2.16E-6 | 4.69E-6 | 1.06E-5   |
| UACC-62                                                                                  | 0.667        | 2.592 | 2.531                                 | 2.606 | 2.398 | 0.146 | 0.171  | 97             | 101  | 90   | -78           | -74  | 1.73E-6 | 3.43E-6 | 6.80E-6   |
| <b>Ovarian Cancer</b>                                                                    |              |       |                                       |       |       |       |        |                |      |      |               |      |         |         |           |
| IGROV1                                                                                   | 0.476        | 1.916 | 1.881                                 | 1.798 | 1.545 | 0.214 | 0.241  | 98             | 92   | 74   | -55           | -49  | 1.54E-6 | 3.75E-6 |           |
| OVCAR-3                                                                                  | 0.515        | 1.695 | 1.746                                 | 1.685 | 1.640 | 0.077 | 0.124  | 104            | 99   | 95   | -85           | -76  | 1.78E-6 | 3.38E-6 | 6.39E-6   |
| OVCAR-4                                                                                  | 0.593        | 1.316 | 1.276                                 | 1.285 | 1.256 | 0.319 | 0.393  | 94             | 96   | 92   | -46           | -34  | 2.00E-6 | 4.62E-6 | > 1.00E-4 |
| OVCAR-5                                                                                  | 0.557        | 1.490 | 1.368                                 | 1.417 | 1.412 | 0.082 | 0.164  | 87             | 92   | 92   | -85           | -71  | 1.72E-6 | 3.30E-6 | 6.32E-6   |
| OVCAR-8                                                                                  | 0.297        | 1.423 | 1.436                                 | 1.481 | 1.385 | 0.206 | 0.203  | 101            | 105  | 97   | -31           | -32  | 2.32E-6 | 5.73E-6 | > 1.00E-4 |
| NCI/ADR-RES                                                                              | 0.575        | 1.782 | 1.735                                 | 1.711 | 1.680 | 0.480 | 0.518  | 96             | 94   | 92   | -17           | -10  | 2.42E-6 | 7.03E-6 | > 1.00E-4 |
| SK-OV-3                                                                                  | 0.901        | 1.822 | 1.745                                 | 1.870 | 1.837 | 0.603 | -0.012 | 92             | 105  | 102  | -33           | -100 | 2.42E-6 | 5.68E-6 | 1.79E-5   |
| <b>Renal Cancer</b>                                                                      |              |       |                                       |       |       |       |        |                |      |      |               |      |         |         |           |
| 786-0                                                                                    | 0.553        | 2.177 | 2.015                                 | 2.058 | 1.995 | 0.111 | 0.171  | 90             | 93   | 89   | -80           | -69  | 1.70E-6 | 3.36E-6 | 6.65E-6   |
| A498                                                                                     | 1.621        | 2.684 | 2.673                                 | 2.645 | 2.627 | 2.220 | 0.085  | 99             | 96   | 95   | 56            | -95  | 1.10E-5 | 2.36E-5 | 5.06E-5   |
| ACHN                                                                                     | 0.352        | 1.471 | 1.418                                 | 1.471 | 1.397 | 0.034 | 0.063  | 95             | 100  | 93   | -90           | -82  | 1.72E-6 | 3.22E-6 | 6.02E-6   |
| RXF 393                                                                                  | 0.991        | 1.635 | 1.656                                 | 1.663 | 1.564 | 0.267 | 0.135  | 103            | 107  | 89   | -73           | -86  | 1.74E-6 | 3.54E-6 | 7.20E-6   |
| SN12C                                                                                    | 0.545        | 2.476 | 2.502                                 | 2.533 | 2.380 | 0.127 | 0.171  | 101            | 103  | 95   | -77           | -69  | 1.63E-6 | 3.57E-6 | 6.98E-6   |
| TK-10                                                                                    | 0.876        | 1.550 | 1.477                                 | 1.418 | 1.417 | 0.119 | -0.004 | 89             | 80   | 80   | -86           | -100 | 1.52E-6 | 3.03E-6 | 6.04E-6   |
| UO-31                                                                                    | 0.544        | 1.776 | 1.684                                 | 1.614 | 1.491 | 0.079 | 0.077  | 92             | 87   | 77   | -85           | -86  | 1.46E-6 | 2.97E-6 | 6.04E-6   |
| <b>Prostate Cancer</b>                                                                   |              |       |                                       |       |       |       |        |                |      |      |               |      |         |         |           |
| PC-3                                                                                     | 0.481        | 1.787 | 1.807                                 | 1.821 | 1.708 | 0.061 | 0.089  | 102            | 103  | 94   | -87           | -82  | 1.75E-6 | 3.30E-6 | 6.22E-6   |
| DU-145                                                                                   | 0.499        | 2.006 | 2.032                                 | 2.000 | 1.947 | 0.032 | -0.009 | 102            | 100  | 96   | -94           | -100 | 1.75E-6 | 3.21E-6 | 5.89E-6   |
| <b>Breast Cancer</b>                                                                     |              |       |                                       |       |       |       |        |                |      |      |               |      |         |         |           |
| MCF7                                                                                     | 0.454        | 2.501 | 2.238                                 | 2.288 | 1.707 | 0.241 | 0.218  | 87             | 90   | 61   | -47           | -52  | 1.27E-6 | 3.68E-6 | 3.88E-5   |
| MDA-MB-231/ATCC                                                                          | 0.548        | 1.547 | 1.533                                 | 1.562 | 1.504 | 0.109 | 0.160  | 99             | 101  | 96   | -80           | -71  | 1.82E-6 | 3.50E-6 | 6.73E-6   |
| HS 578T                                                                                  | 1.054        | 2.057 | 2.056                                 | 2.063 | 2.009 | 0.930 | 0.946  | 100            | 101  | 95   | -12           | -10  | 2.65E-6 | 7.76E-6 | > 1.00E-4 |
| BT-549                                                                                   | 1.110        | 2.332 | 2.137                                 | 2.240 | 2.013 | 0.101 | 0.117  | 84             | 93   | 74   | -91           | -90  | 1.40E-6 | 2.81E-6 | 5.85E-6   |
| T-47D                                                                                    | 0.737        | 1.704 | 1.602                                 | 1.625 | 1.602 | 0.463 | 0.513  | 89             | 92   | 89   | -37           | -30  | 2.05E-6 | 5.08E-6 | > 1.00E-4 |
| MDA-MB-468                                                                               | 0.939        | 1.582 | 1.533                                 | 1.572 | 1.536 | 0.568 | 0.546  | 92             | 98   | 93   | -40           | -42  | 2.10E-6 | 5.02E-6 | > 1.00E-4 |

Fig.71b. Five dose mean graph of nine different cancer cell line panels for compound 8v

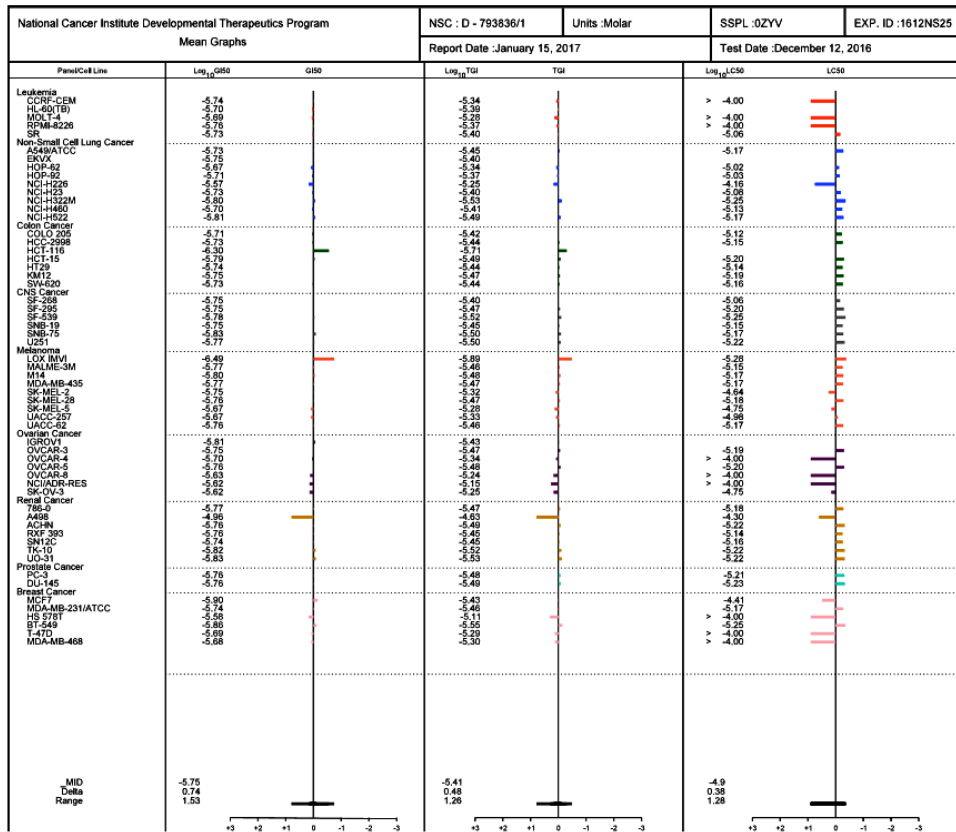

Fig.71c. Five dose mean graph of nine different cancer cell line panels for compound 8v

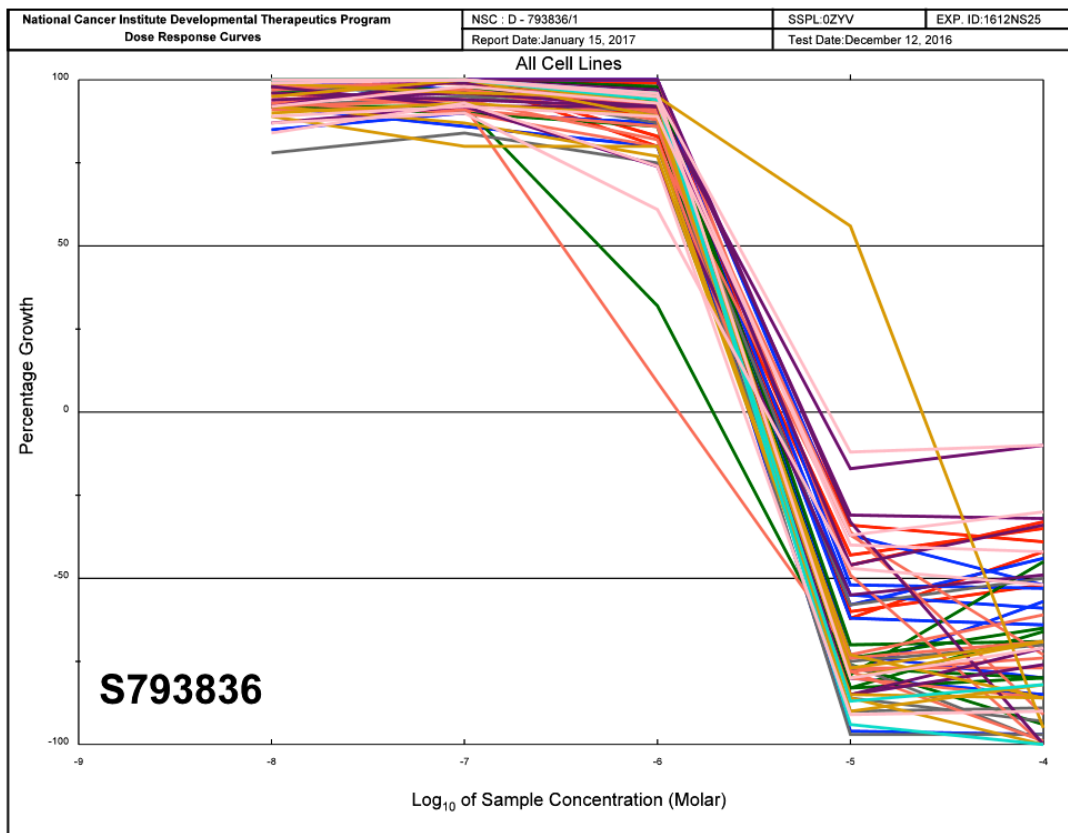

**Fig.71d.** Five dose mean graph of nine different cancer cell line panels for compound **8v**



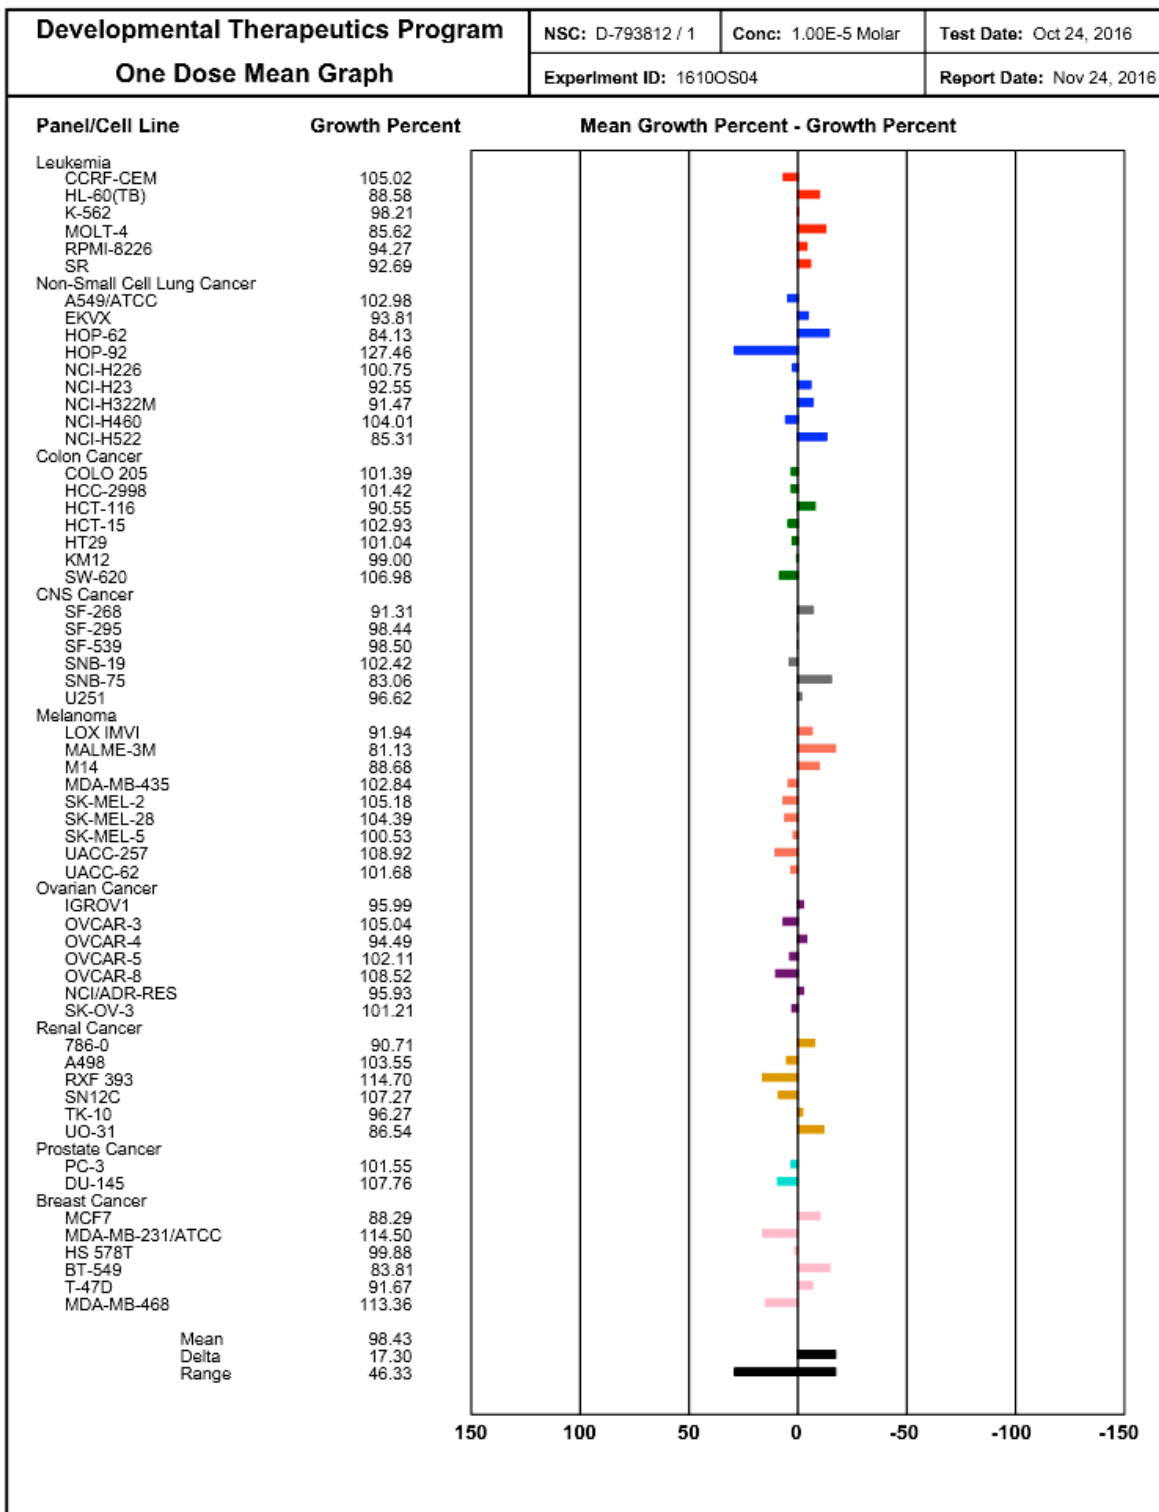

Fig.72. One dose mean graph of nine different cancer cell line panels for compound **8w**

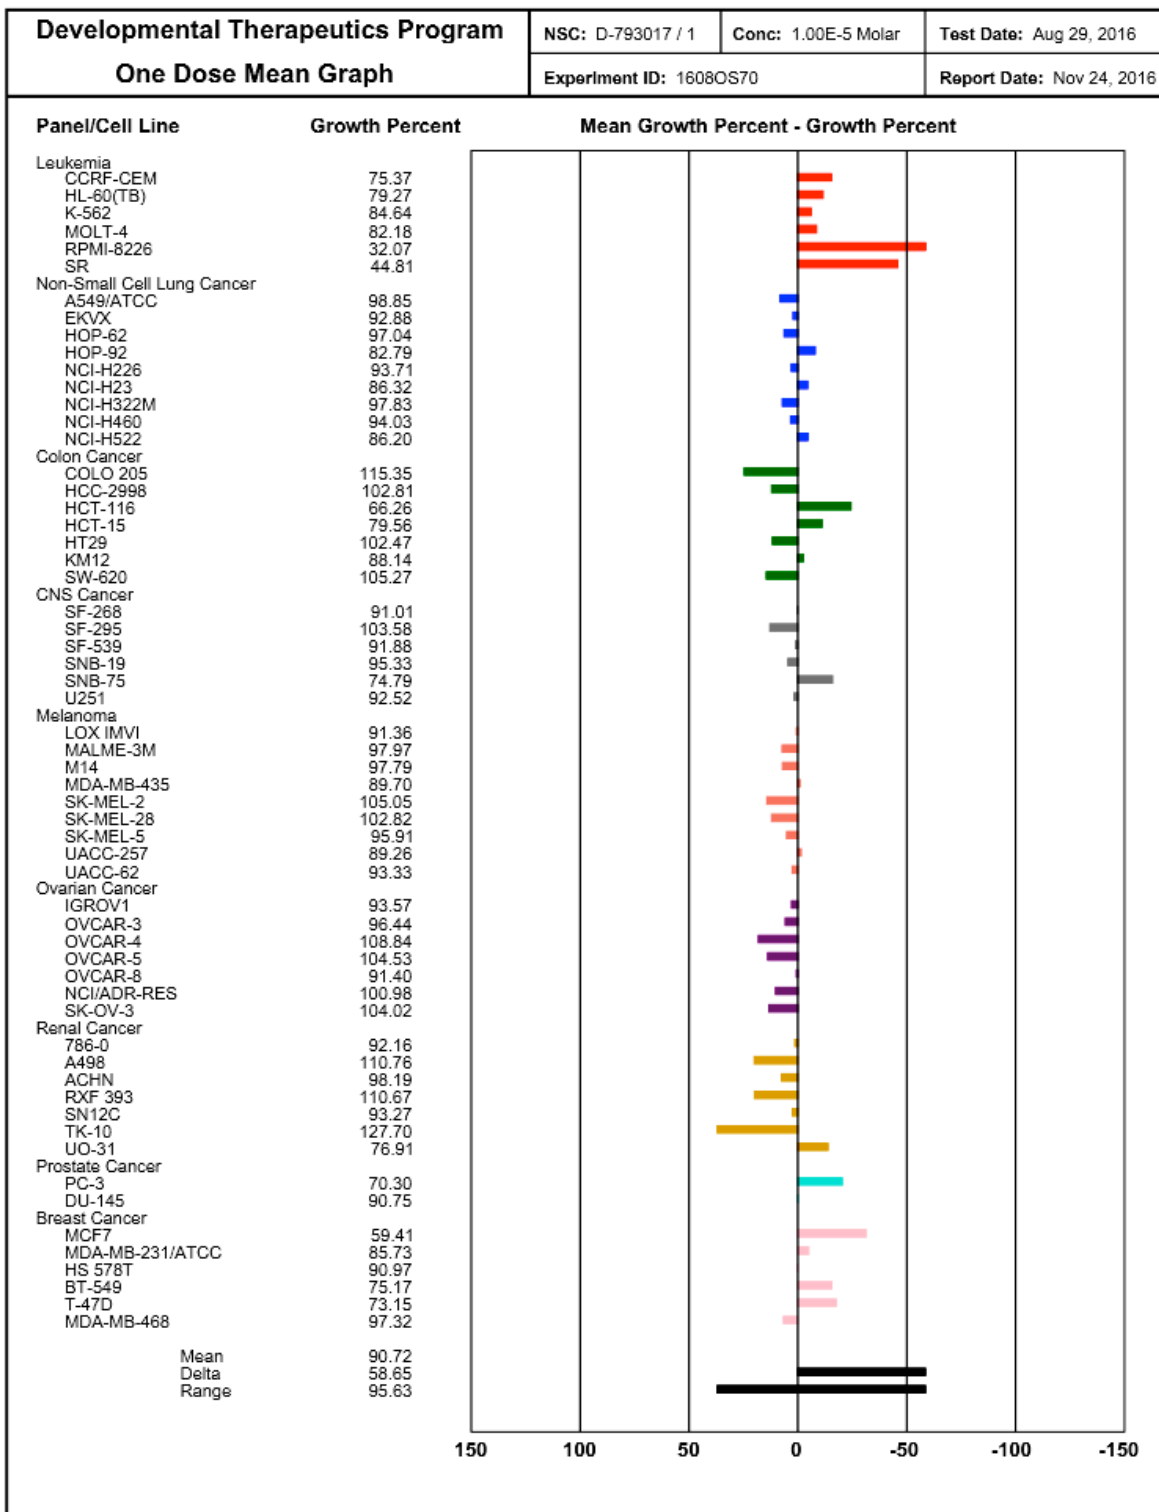

Fig.73. One dose mean graph of nine different cancer cell line panels for compound 8x

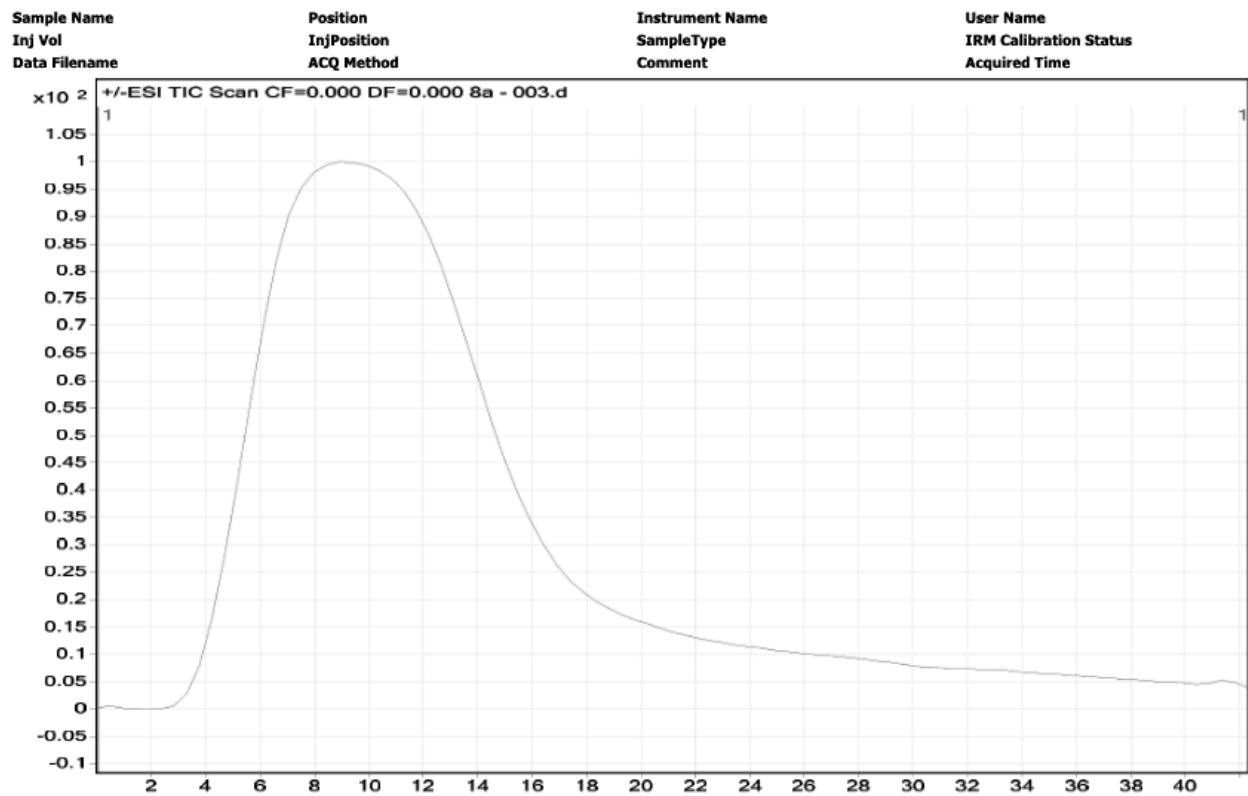

**Fig.74.** Chromatogram of compound **8a**.

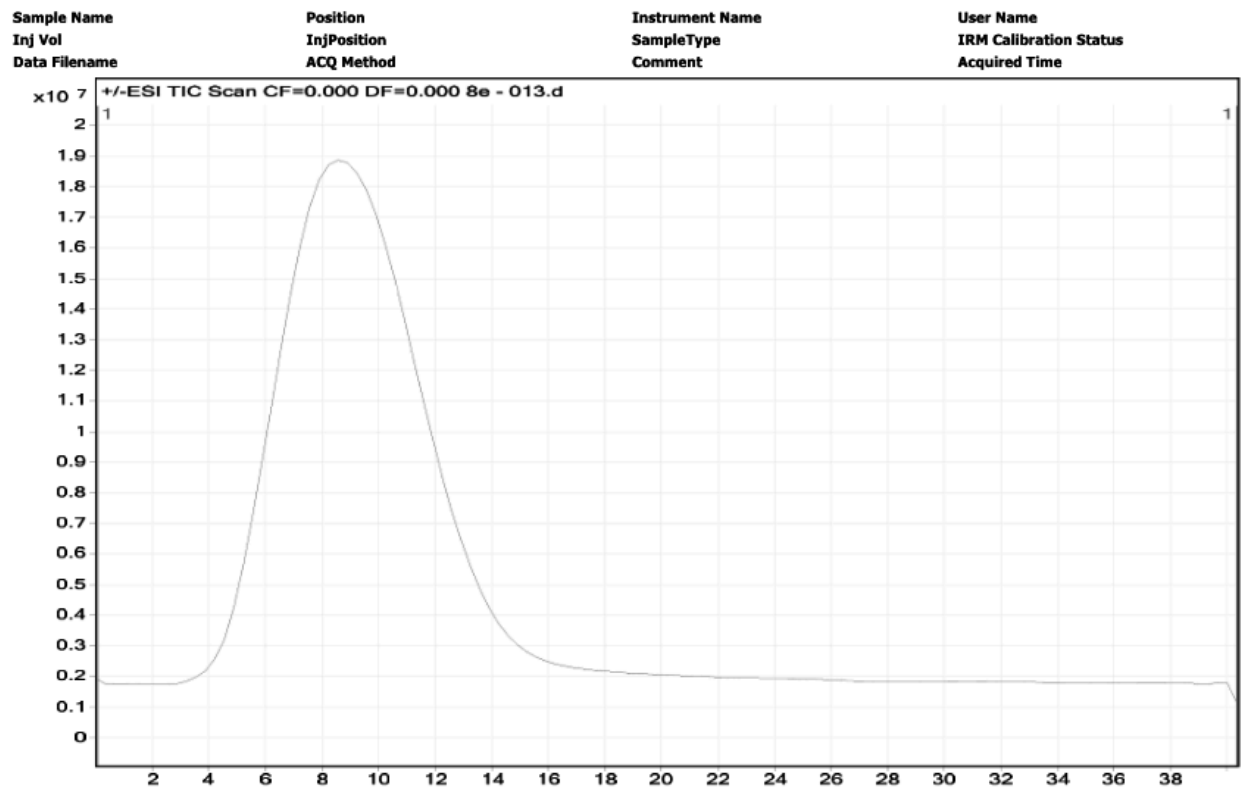

**Fig.75.** Chromatogram of compound **8e**.

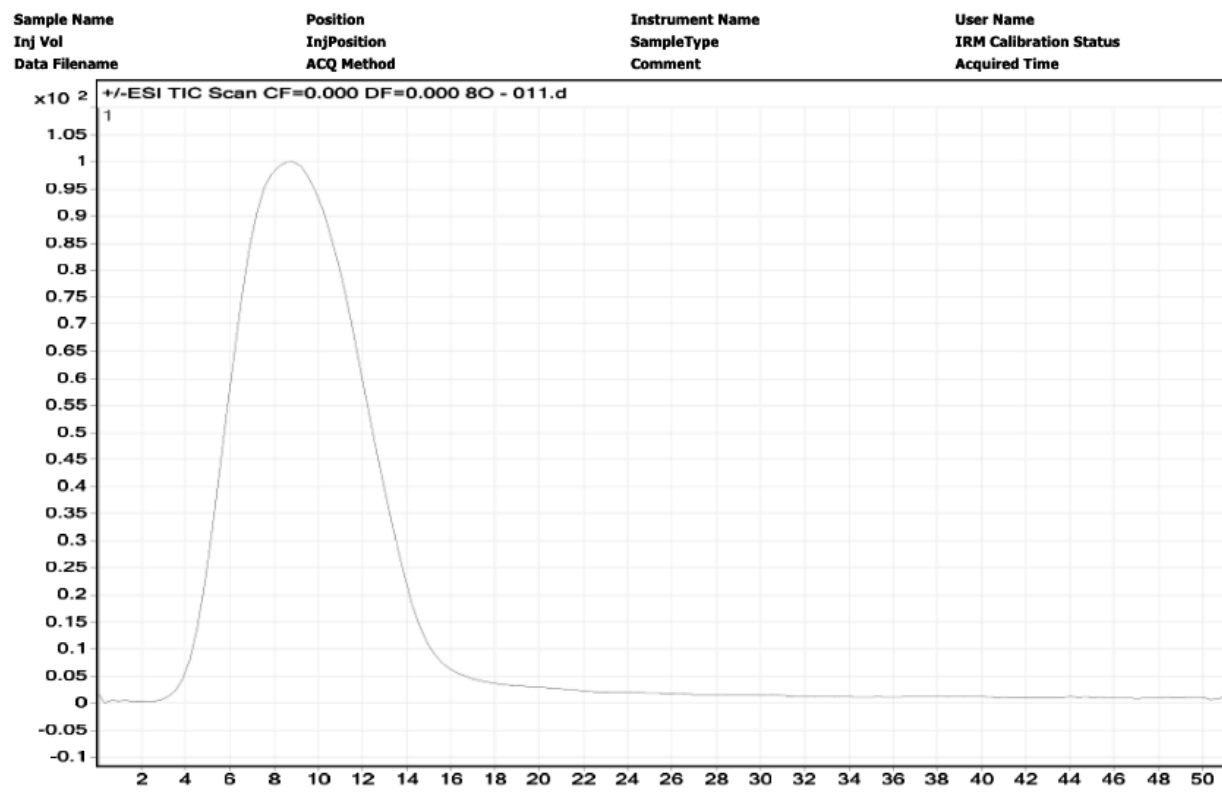

**Fig.76.** Chromatogram of compound **80**.

|               |            |             |                  |                 |          |                        |                        |
|---------------|------------|-------------|------------------|-----------------|----------|------------------------|------------------------|
| Sample Name   | Sample1    | Position    | P2A1             | Instrument Name | LCMS-QQQ | User Name              | LCMS-QQQ-PC\Admin      |
| Inj Vol       | 20         | InjPosition |                  | SampleType      | Sample   | IRM Calibration Status | Not Applicable         |
| Data Filename | 8a - 003.d | ACQ Method  | mai-direct inj.m | Comment         |          | Acquired Time          | 10/29/2018 10:39:51 AM |

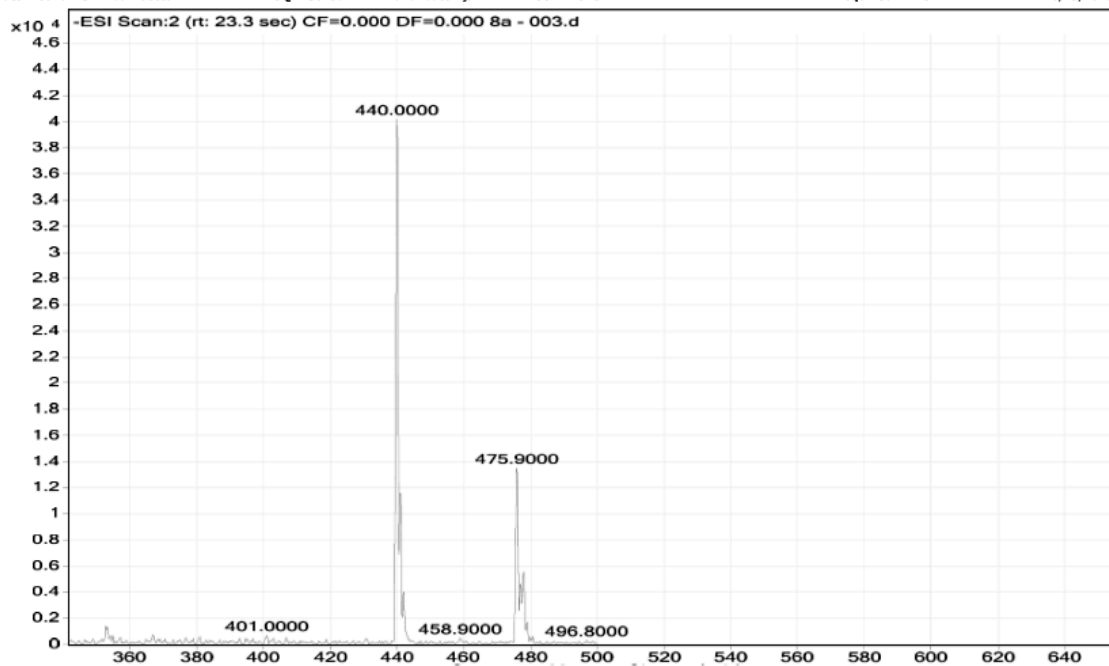

Fig. 77. LC-MS spectrum of compound **8a**.

|               |            |             |                  |                 |          |                        |                        |
|---------------|------------|-------------|------------------|-----------------|----------|------------------------|------------------------|
| Sample Name   | Sample1    | Position    | P2A1             | Instrument Name | LCMS-QQQ | User Name              | LCMS-QQQ-PC\Admin      |
| Inj Vol       | 20         | InjPosition |                  | SampleType      | Sample   | IRM Calibration Status | Not Applicable         |
| Data Filename | 8n - 005.d | ACQ Method  | mai-direct inj.m | Comment         |          | Acquired Time          | 10/29/2018 10:44:02 AM |

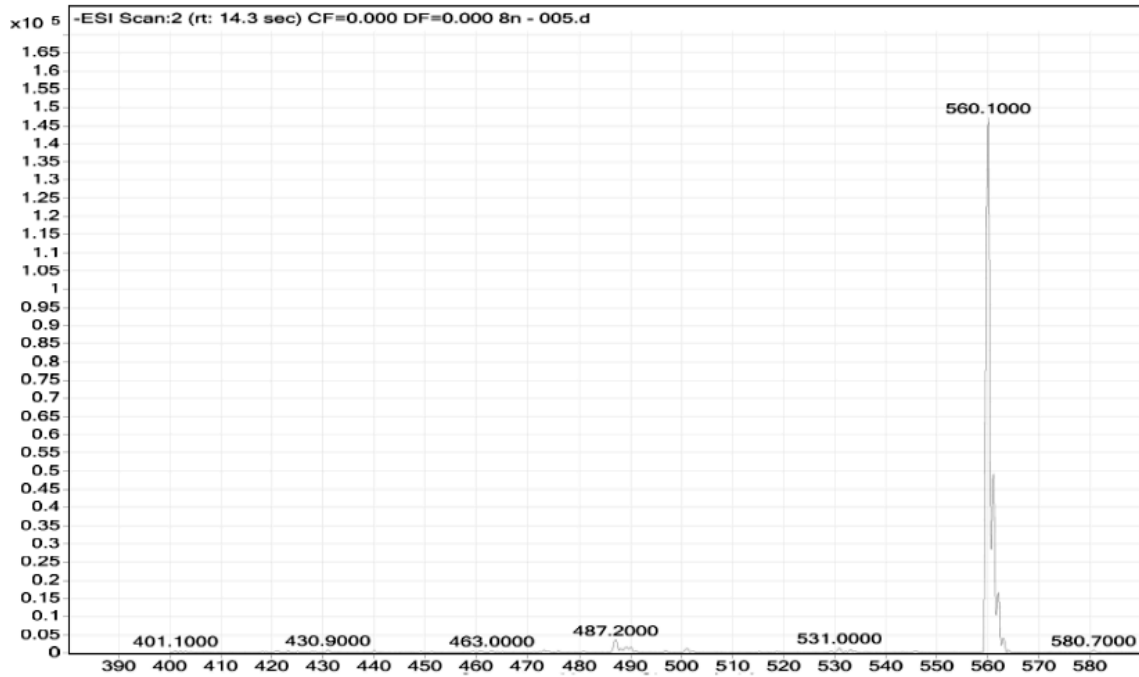

Fig. 78. LC-MS spectrum of compound **8n**.

|               |           |             |                  |                 |          |                        |                        |
|---------------|-----------|-------------|------------------|-----------------|----------|------------------------|------------------------|
| Sample Name   | Sample1   | Position    | P2A1             | Instrument Name | LCMS-QQQ | User Name              | LCMS-QQQ-PC\Admin      |
| Inj Vol       | 20        | InjPosition |                  | SampleType      | Sample   | IRM Calibration Status | Not Applicable         |
| Data Filename | 8v - 03.d | ACQ Method  | mai-direct inj.m | Comment         |          | Acquired Time          | 10/23/2018 12:23:23 PM |

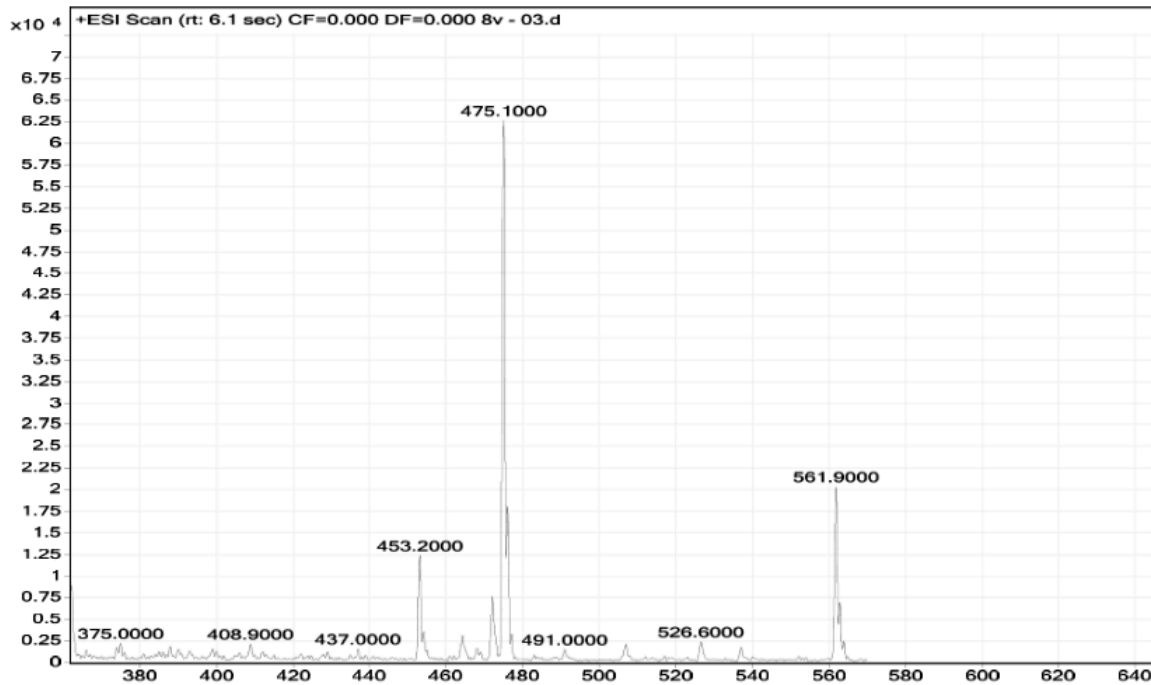

Fig. 79. LC-MS spectrum of compound **8v**.



**Table 1.** Cell growth inhibition % from the NCI's *in vitro* human tumor cell screen for compounds **8a-l**

| Panel/Cell Line                   | Compounds |       |       |       |       |       |       |       |       |       |       |       |
|-----------------------------------|-----------|-------|-------|-------|-------|-------|-------|-------|-------|-------|-------|-------|
|                                   | 8a        | 8b    | 8c    | 8d    | 8e    | 8f    | 8g    | 8h    | 8i    | 8j    | 8k    | 8l    |
| <b>Leukemia</b>                   |           |       |       |       |       |       |       |       |       |       |       |       |
| <b>CCRF-CEM</b>                   | 44.55     | 5.22  | 6.32  | 32.96 | 13.9  | nd    | nd    | 9.54  | 9.31  | 12.74 | 0     | 23.39 |
| <b>HL-60(TB)</b>                  | 28.99     | 32.05 | 7.69  | 31.12 | 2.9   | 15.61 | 28.11 | 13.7  | 2.29  | 4.6   | 21.84 | 28.86 |
| <b>K-562</b>                      | 91.98     | 10.73 | 3.94  | 41.55 | 0.68  | 6.55  | 25.09 | 12.51 | 10.66 | 20.48 | 16.53 | 22.45 |
| <b>MOLT-4</b>                     | 40.99     | 13.01 | 2.44  | 39.41 | 6.93  | 7.37  | 20.99 | 12.63 | 8.37  | 12.47 | 7.33  | 35.22 |
| <b>RPML-8226</b>                  | 97.65     | 11.18 | 26.72 | 53.8  | 31.29 | 7.51  | 29.84 | 16.81 | 12.25 | 54.29 | 34.32 | 32.71 |
| <b>SR</b>                         | 71.25     | 9.8   | 23.74 | 50.79 | 39.57 | 1.71  | 10.99 | 20.48 | 32.85 | 37.05 | 55.77 | 10.95 |
| <b>Non-Small Cell Lung Cancer</b> |           |       |       |       |       |       |       |       |       |       |       |       |
| <b>A549/ATCC</b>                  | 39.75     | 16.96 | 1.67  | 27.82 | 3.99  | 4.43  | 9.04  | -5.93 | 9.44  | 3.99  | 14.79 | 18.92 |
| <b>EKVX</b>                       | 20.34     | 6.91  | 0     | 13.73 | 2.03  | 0     | 0     | 2.9   | 5.8   | 8.31  | 1.29  | 6.71  |
| <b>HOP-62</b>                     | 27.61     | 14.51 | 0     | 0     | 0     | 4.19  | 0     | 0     | 3.28  | 9.93  | 13.77 | 12.36 |
| <b>HOP-92</b>                     | 39.35     | 7.65  | 0     | 4.23  | 0     | 0     | 2.85  | 0     | 0     | 18.82 | 3.57  | 13.31 |
| <b>NCI-H226</b>                   | 14.57     | 12.35 | 0     | 10.36 | 0     | 6.72  | 7.53  | 4.84  | 1.61  | 9.97  | 1.87  | 13.18 |
| <b>NCI-H23</b>                    | 22.4      | 2.97  | 6.21  | 11.52 | 6.72  | 12.34 | 4.23  | 8.98  | 8.17  | 10.16 | 11.18 | 3.51  |
| <b>NCI-H322M</b>                  | 28.87     | 2.2   | 12.85 | 0     | 9.47  | nd    | nd    | 7.22  | 4.66  | 11.79 | 1.02  | 3.56  |
| <b>NCI-H460</b>                   | 51.62     | 0     | 0     | 17.49 | 2.32  | 1.83  | 1.41  | 0     | 6.6   | 13.32 | 20.38 | 0.2   |
| <b>NCI-H522</b>                   | 34.85     | 16.4  | 11.21 | 21.9  | 13.27 | 13.22 | 19.02 | 21.57 | 20.94 | 28.16 | 10.37 | 49.12 |

**Table 1 (continuous).** Cell growth inhibition % from the NCI's in vitro human tumor cell screen for compounds **8a-l**.

| Panel/Cell Line     | Compounds |       |       |       |       |      |       |       |       |       |       |       |
|---------------------|-----------|-------|-------|-------|-------|------|-------|-------|-------|-------|-------|-------|
|                     | 8a        | 8b    | 8c    | 8d    | 8e    | 8f   | 8g    | 8h    | 8i    | 8j    | 8k    | 8l    |
| <b>Colon Cancer</b> |           |       |       |       |       |      |       |       |       |       |       |       |
| <b>COLO 205</b>     | 20.78     | 0     | 0     | 0     | 0     | 0    | 0     | 0     | 0     | 0     | 0     | 0     |
| <b>HCC-2998</b>     | 53.45     | 0     | 0     | 0.87  | 0     | 6.91 | 3.76  | 0.83  | 6.98  | -0.24 | 0     | 1.26  |
| <b>HCT-116</b>      | 102.15    | 10.78 | 22.41 | 58.2  | 34.33 | 0    | 20.63 | 15.44 | 15.22 | 82.46 | 31.55 | 27.33 |
| <b>HCT-15</b>       | 74.16     | 2.54  | 2.94  | 25.05 | 3.35  | 0    | 0     | 4.34  | 5.54  | 7.65  | 1.41  | 7.21  |
| <b>HT29</b>         | 67.55     | 12.07 | 0     | 19.46 | 1.95  | 0.95 | 1.24  | 4.89  | 10.16 | 5.45  | 5.1   | 15.98 |
| <b>KM12</b>         | 69.84     | 1.87  | 2.89  | 6.49  | 0.04  | 2.2  | 2.92  | 4.86  | 6.39  | 15.48 | 6.67  | 8.83  |
| <b>SW-620</b>       | 60.55     | 5.12  | 0     | 13.26 | 0     | 0    | 0     | 0     | 0     | 0.74  | 5.49  | 1.64  |
| <b>CNS cancer</b>   |           |       |       |       |       |      |       |       |       |       |       |       |
| <b>SF-268</b>       | 34.15     | 10.65 | 0     | 4.23  | 0     | 0.26 | 0     | 0     | 0     | 15.15 | 6.6   | 2.64  |
| <b>SF-295</b>       | 22.72     | 2.53  | 0     | 0     | 0     | 0    | 0     | 0     | 1.99  | 0.88  | 6.19  | 0     |
| <b>SF-539</b>       | 15.33     | 3.12  | 0     | 5.11  | 0     | 0    | 0     | 0     | 0     | 7.6   | 4.23  | 2.84  |
| <b>SNB-19</b>       | 35.13     | 14.95 | 18.1  | 14.92 | 13.06 | 5.4  | 0     | 0.47  | 0     | 22.01 | 1.01  | 6.32  |
| <b>SNB-75</b>       | 66.53     | 14.48 | 18.93 | 12.4  | 9.65  | 1.92 | 0     | 6.66  | 8.68  | 26.69 | 6.55  | 3.43  |
| <b>U251</b>         | 55.93     | 24.92 | 6.8   | 22.36 | 0.72  | 0    | 0     | 0     | 9.75  | 7.15  | 0     | 26.25 |

**Table 1 (continuous).** Cell growth inhibition % from the NCI's in vitro human tumor cell screen for compounds **8a-l**.

| Panel/Cell Line       | Compounds |       |       |       |       |       |       |       |       |       |       |       |
|-----------------------|-----------|-------|-------|-------|-------|-------|-------|-------|-------|-------|-------|-------|
|                       | 8a        | 8b    | 8c    | 8d    | 8e    | 8f    | 8g    | 8h    | 8i    | 8j    | 8k    | 8l    |
| <b>Melanoma</b>       |           |       |       |       |       |       |       |       |       |       |       |       |
| <b>LOX IMVI</b>       | 75.63     | 14.4  | 8.89  | 16.39 | 14.74 | 2.01  | 10.65 | 7.29  | 2.00  | 24.83 | 9.74  | 8.3   |
| <b>MALME-3M</b>       | 30.24     | 2.5   | 4.66  | 0     | 0     | 0     | 2.53  | 5.39  | 0     | 2.71  | 0     | 0     |
| <b>M14</b>            | 33.61     | 5.61  | 0     | 4.19  | 3.96  | 0     | 7.75  | 10.45 | 11.11 | 2.29  | 1.09  | 8.35  |
| <b>MDA-MB-435</b>     | 44.54     | 0     | 5.69  | 8.34  | 8.58  | 1.87  | 10.15 | 0     | 2.03  | 27.18 | 0     | 9.55  |
| <b>SK-MEL-2</b>       | 0.81      | 2.1   | 0     | 8.98  | 7.15  | 0     | 0     | 0     | 3.62  | 9.66  | 0     | 3.53  |
| <b>SK-MEL-28</b>      | 3.04      | 0     | 0     | 0     | 0     | 0     | 0     | 0     | 0     | 0     | 0     | 2.82  |
| <b>SK-MEL-5</b>       | 21.11     | 21.03 | 7.17  | 1.43  | 2     | 5.9   | 6.5   | 3.65  | 13.53 | 3.65  | 0     | 20.65 |
| <b>UACC-257</b>       | 0         | 21.25 | 0.78  | 28.34 | 0     | 1.34  | 1.19  | 0     | 18.82 | 0     | 3.69  | 15.66 |
| <b>UACC-62</b>        | 17.7      | 1.02  | 16.98 | 6.32  | 14.43 | 12.39 | 11.14 | 0.53  | 7.98  | 20.39 | 4.66  | 17.85 |
| <b>Ovarian Cancer</b> |           |       |       |       |       |       |       |       |       |       |       |       |
| <b>IGROV1</b>         | 62.05     | 0     | 0     | 2.75  | 4.3   | 0     | 0     | 0     | 0.72  | 24.3  | 11.24 | 0     |
| <b>OVCAR-3</b>        | 58.19     | 3.42  | 0     | 5.57  | 0     | 0     | 0     | 0     | 0     | 8.96  | 0     | 0     |
| <b>OVCAR-4</b>        | 69.09     | 0     | 0     | 0     | 0     | 10.66 | 0.56  | 7.36  | 1.65  | 12.74 | 0     | 0     |
| <b>OVCAR-5</b>        | 0         | 0.22  | 0     | 0     | 0     | 0     | 0     | 0     | 3.54  | 0     | 0     | 0     |
| <b>OVCAR-8</b>        | 39.95     | 3.32  | 0.51  | 19.73 | 2.72  | 0     | 0     | 0     | 5.43  | 6.69  | 7.34  | 16.09 |
| <b>NCI/ADR-RES</b>    | 46.39     | 0     | 0.83  | 9.28  | 11.88 | 3.58  | 0.27  | 2.9   | 0     | 19.05 | 12.62 | 9.05  |
| <b>SK-OV-3</b>        | 0         | 0     | 0     | 0     | 0     | 9.36  | 0     | 0     | 6.1   | 0     | 8.9   | 3.93  |

**Table 1 (continuous).** Cell growth inhibition % from the NCI's in vitro human tumor cell screen for compounds **8a-l**.

| Panel/Cell Line        | Compounds |       |       |       |       |       |       |       |       |       |       |       |
|------------------------|-----------|-------|-------|-------|-------|-------|-------|-------|-------|-------|-------|-------|
|                        | 8a        | 8b    | 8c    | 8d    | 8e    | 8f    | 8g    | 8h    | 8i    | 8j    | 8k    | 8l    |
| <b>Renal Cancer</b>    |           |       |       |       |       |       |       |       |       |       |       |       |
| 786-0                  | 15.23     | 0     | 0     | 0     | 2.19  | 0     | 1.18  | 8.75  | 0     | 2.09  | 0     | 3.51  |
| A498                   | 16.21     | 0     | 2.01  | 1.63  | 4.32  | 5.27  | 13.57 | 9.39  | 0     | 5.47  | 0     | 7.82  |
| RXF 393                | 6.93      | 0     | 0     | 15.82 | 0     | 0.88  | 0     | 0     | 0     | 13.66 | 0     | 0     |
| SN12C                  | 18.34     | 5.51  | 10.66 | 16.58 | 4.54  | 4.05  | 5.04  | 0.72  | 3.27  | 18.49 | 2.08  | 6.09  |
| TK-10                  | 8.98      | 0     | 1.18  | 0     | 6.31  | 0     | 0     | 0     | 0     | 19.53 | 0     | 1.99  |
| UO-31                  | 44.27     | 1.48  | 8.6   | 18.85 | 19.89 | 30.62 | 22.75 | 5.82  | 11.5  | 13.05 | 27.1  | 22.28 |
| <b>Prostate Cancer</b> |           |       |       |       |       |       |       |       |       |       |       |       |
| PC-3                   | 22.98     | 24.62 | 0     | 23.11 | 0.61  | 7.21  | 20.69 | 0     | 3.59  | 12.68 | 20.26 | 29.44 |
| DU-31                  | 37.28     | 0     | 0.96  | 4.44  | 0     | 0     | 0     | 0     | 2.23  | 10.12 | 0     | 1.39  |
| <b>Breast Cancer</b>   |           |       |       |       |       |       |       |       |       |       |       |       |
| MCF7                   | 92.23     | 10.34 | 30.85 | 51.56 | 46.86 | 22.02 | 39.75 | 18.05 | 9.3   | 65.02 | 38.68 | 25.6  |
| MDA-MB231/ATCC         | 16.09     | 7.15  | 0     | 12.27 | 0.93  | 0     | 0     | 0     | 39.59 | 11.75 | 5.89  | 6.53  |
| HS 578T                | 11.49     | 6.08  | 0.74  | 0     | 0     | 4.1   | 0     | 0     | 0     | 8.71  | 0     | 0     |
| BT-549                 | 25.53     | 5.73  | 3.72  | 26.71 | 0.21  | 0     | 0     | 21.96 | 14.47 | 3.47  | 7.23  | 23.00 |
| T-47D                  | 20.63     | 13.52 | 6.93  | 15.03 | 0     | 1.37  | 18.07 | 6.04  | 10.53 | 7.11  | 20.64 | 34.97 |
| MDA-MB-468             | 41.72     | 3.68  | 5.89  | 25.22 | 1.34  | 0     | 0     | 0     | 0     | 30.44 | 0     | 8.72  |

nd= not detected

**Table 2.** Cell growth inhibition % from the NCI's *in vitro* human tumor cell screen for compounds **8m-x**

| Panel/Cell Line                   | Compounds |       |       |       |       |       |       |       |       |        |       |       |
|-----------------------------------|-----------|-------|-------|-------|-------|-------|-------|-------|-------|--------|-------|-------|
|                                   | 8m        | 8n    | 8o    | 8p    | 8q    | 8r    | 8s    | 8t    | 8u    | 8v     | 8w    | 8x    |
| <b>leukemia</b>                   |           |       |       |       |       |       |       |       |       |        |       |       |
| <b>CCRF-CEM</b>                   | 22.33     | 65.14 | -2.04 | 34.9  | 0.26  | 0.72  | 14.36 | 0     | 3.1   | 101.51 | 0     | 24.63 |
| <b>HL-60(TB)</b>                  | 25.3      | 40.3  | 10.05 | 6.92  | 11.41 | 2.74  | 13.6  | 11.24 | 14.35 | 153.42 | 11.42 | 20.73 |
| <b>K-562</b>                      | 38.31     | 74.29 | 4.63  | 48.01 | 19.9  | 0     | 35.8  | 12.17 | 3.46  | 152.18 | 1.79  | 15.36 |
| <b>MOLT-4</b>                     | 31.88     | 55.67 | 10.93 | 58.87 | 24.36 | 0     | 15.49 | 16.88 | 7.07  | 125.94 | 14.38 | 17.82 |
| <b>RPMI-8226</b>                  | 39.93     | 77.14 | 29.49 | 40.6  | 23.98 | 0     | 43.49 | 8.14  | 10.06 | 143.74 | 5.73  | 67.93 |
| <b>SR</b>                         | 39.93     | 71.71 | 11.87 | 75.82 | 22.57 | 0     | 37.91 | 11.39 | 2.73  | 160.49 | 7.31  | 55.19 |
| <b>Non-Small Cell Lung Cancer</b> |           |       |       |       |       |       |       |       |       |        |       |       |
| <b>A549/ATCC</b>                  | 22.31     | 14.57 | 2.26  | 9.29  | 0     | 0.76  | 5.28  | 0     | 2.71  | 92.15  | 0     | 1.15  |
| <b>EKVX</b>                       | 10.05     | 19.01 | 0     | 19.83 | 2.81  | 0     | 8.37  | 2.55  | 9.68  | 102.83 | 6.19  | 7.12  |
| <b>HOP-62</b>                     | 26.44     | 0     | 0     | 28.20 | 0     | 0     | 0     | 13    | 11.8  | 56.23  | 15.87 | 2.96  |
| <b>HOP-92</b>                     | 18.7      | 0     | 0     | 70.25 | 0     | 0     | 0     | 0     | 5.58  | 155.37 | 0     | 17.21 |
| <b>NCI-H226</b>                   | 13.75     | 6.01  | 10.96 | 14.28 | 3.41  | 0     | 0     | 1.30  | 6.68  | 87.10  | 0     | 6.29  |
| <b>NCI-H23</b>                    | 8.06      | 25.71 | 12.01 | 21.02 | 9.69  | 5.22  | 15.15 | 6.12  | 9.12  | 117.01 | 7.45  | 13.68 |
| <b>NCI-H322M</b>                  | 5.42      | 22.89 | 9.20  | 12.64 | 3.79  | 10.56 | 11.01 | 4.24  | 10.54 | 79.76  | 8.53  | 2.17  |
| <b>NCI-H460</b>                   | 4.92      | 21.61 | 0     | 29.98 | 1.25  | 0     | 6.18  | 0     | 0     | 85.54  | 0     | 5.97  |
| <b>NCI-H522</b>                   | 31.63     | 43.83 | 8.64  | 83.27 | 23.19 | 6.27  | 15.58 | 18.14 | 17.89 | 176.37 | 14.69 | 13.80 |

**Table 2 (continuous).** Cell growth inhibition % from the NCI's in vitro human tumor cell screen for compounds **8m-x**.

| Panel/Cell Line     | Compounds |       |       |       |       |       |       |       |       |        |       |       |
|---------------------|-----------|-------|-------|-------|-------|-------|-------|-------|-------|--------|-------|-------|
|                     | 8m        | 8n    | 8o    | 8p    | 8q    | 8r    | 8s    | 8t    | 8u    | 8v     | 8w    | 8x    |
| <b>Colon Cancer</b> |           |       |       |       |       |       |       |       |       |        |       |       |
| <b>COLO 205</b>     | 0         | 1.27  | 0     | 0     | 0     | 0     | 0     | 0     | 0     | 161.07 | 0     | 0     |
| <b>HCC-2998</b>     | 0         | 20.4  | 0     | 4.02  | 2.44  | 0     | 7.47  | 0     | 0     | 172.05 | 0     | 0     |
| <b>HCT-116</b>      | 22.19     | 74.66 | 48.19 | 24.42 | 30.84 | 10.82 | 34.06 | 18.77 | 5.11  | 176.44 | 9.45  | 33.74 |
| <b>HCT-15</b>       | 25.19     | 57.06 | 5.43  | 18.74 | 18.04 | 1.77  | 30.3  | 0     | 15.01 | 191.80 | 0     | 20.44 |
| <b>HT29</b>         | 12.88     | 40.82 | 6.64  | 10.2  | 0     | 0     | 6.22  | 4.49  | 2.21  | 161.53 | 0     | 0     |
| <b>KM12</b>         | 15.53     | 33.84 | 0.45  | 2.12  | 8.51  | 0     | 13.74 | 1.8   | 3.48  | 161.07 | 1.00  | 11.86 |
| <b>SW-620</b>       | 7.28      | 41    | 0     | 0     | 4.45  | 2.8   | 1.41  | -8.46 | 1.27  | 172.05 | 0     | 0     |
| <b>CNS cancer</b>   |           |       |       |       |       |       |       |       |       |        |       |       |
| <b>SF-268</b>       | 1.84      | 28.44 | 2.41  | 17.84 | 8.35  | 5.71  | 9.37  | 6.18  | 13.28 | 176.70 | 8.69  | 8.99  |
| <b>SF-295</b>       | 3.55      | 4.63  | 0     | 19.56 | 0     | 0     | 0     | 2.35  | 7.72  | 42.35  | 1.56  | 0     |
| <b>SF-539</b>       | 4.03      | 8.84  | 4.30  | 45.53 | 1.65  | 0     | 9.72  | 3.56  | 8.55  | 190.35 | 1.50  | 8.12  |
| <b>SNB-19</b>       | 10.44     | 20.79 | 7.84  | 15.41 | 3.11  | 7.61  | 5.55  | 0     | 0     | 148.75 | 0     | 4.67  |
| <b>SNB-75</b>       | 12.52     | 25.37 | 7.19  | 28.55 | 10.86 | 11.85 | 18.99 | 15.82 | 21.84 | 189.68 | 16.94 | 25.21 |
| <b>U251</b>         | 33.07     | 35.67 | 2.04  | 11.53 | 5.24  | 5.18  | 9.67  | -1.47 | 6.29  | 190.06 | 3.38  | 7.48  |

**Table 2 (continuous).** Cell growth inhibition % from the NCI's in vitro human tumor cell screen for compounds **8m-x**.

| Panel/Cell Line       | Compounds |       |       |        |       |      |       |       |       |        |       |       |
|-----------------------|-----------|-------|-------|--------|-------|------|-------|-------|-------|--------|-------|-------|
|                       | 8m        | 8n    | 8o    | 8p     | 8q    | 8r   | 8s    | 8t    | 8u    | 8v     | 8w    | 8x    |
| <b>Melanoma</b>       |           |       |       |        |       |      |       |       |       |        |       |       |
| <b>LOX IMVI</b>       | 22.93     | 49.14 | 14.15 | 20.97  | 27.97 | 0    | 21.61 | 10.19 | 13.66 | 169.37 | 8.06  | 8.64  |
| <b>MALME-3M</b>       | 0         | 23.58 | 0     | 94.21  | 7.60  | 0    | 25.92 | 9.96  | 0     | 170.75 | 18.87 | 2.03  |
| <b>M14</b>            | 0         | 20.44 | 0     | 18.30  | 11.78 | 1.40 | 16.52 | 12.4  | 6.14  | 160.12 | 11.32 | 2.21  |
| <b>MDA-MB-435</b>     | 5.81      | 29.45 | 7.26  | 18.90  | 14.38 | 2.05 | 15.29 | 2.88  | 5.74  | 139.23 | 0     | 10.3  |
| <b>SK-MEL-2</b>       | 5.86      | 13.09 | 2.02  | 27.96  | 7.06  | 3.41 | 4.81  | 6.8   | 0.33  | 62.26  | 0     | 0     |
| <b>SK-MEL-28</b>      | 0.53      | 6.4   | 0     | 17.79  | 0     | 0    | 3.16  | 0     | 4.83  | 120.95 | 0     | 0     |
| <b>SK-MEL-5</b>       | 24.07     | 30.82 | 12.93 | 43.29  | 13.82 | 4.53 | 33.88 | 20.5  | 13.65 | 184.20 | 0     | 4.09  |
| <b>UACC-257</b>       | 26.25     | 7.28  | 0     | 8.59   | 0     | 0    | 8.45  | 0     | 0     | 59.91  | 0     | 10.74 |
| <b>UACC-62</b>        | 17.09     | 28.51 | 7.62  | 37.26  | 7.67  | 8.06 | 10.32 | 0     | 8.88  | 146.35 | 0     | 6.67  |
| <b>Ovarian Cancer</b> |           |       |       |        |       |      |       |       |       |        |       |       |
| <b>IGROV1</b>         | 14.06     | 52.52 | 0     | 29.58  | 11    | 0    | 19.82 | 0     | 21.1  | 139.19 | 4.01  | 6.43  |
| <b>OVCAR-3</b>        | 0         | 39.42 | 0     | 0      | 2.82  | 0    | 6.97  | 0     | 4.25  | 193.82 | 0     | 3.56  |
| <b>OVCAR-4</b>        | 13.1      | 15.16 | 0     | 117.08 | 0     | 0    | 6.61  | 0     | 2.6   | 50.12  | 5.51  | 0     |
| <b>OVCAR-5</b>        | 0         | 2.03  | 0     | 9.54   | 0     | 0    | 1.6   | 0     | 6.12  | 92.52  | 0     | 0     |
| <b>OVCAR-8</b>        | 11.94     | 22.75 | 1.16  | 62.6   | 0     | 0    | 3.44  | 0     | 0     | 114.33 | 0     | 8.6   |
| <b>NCI/ADR-RES</b>    | 9.92      | 25.01 | 6.46  | 61.62  | 8.04  | 2.48 | 11.05 | 7.86  | 12.41 | 96.87  | 4.07  | 0     |
| <b>SK-OV-3</b>        | 15.39     | 0     | 0     | 12.63  | 0     | 0    | 0     | 0     | 0     | 14.75  | 0     | 0     |

**Table 2 (continuous).** Cell growth inhibition % from the NCI's in vitro human tumor cell screen for compounds **8m-x**.

| Panel/Cell Line        | Compounds |       |       |       |       |      |       |       |       |        |       |       |
|------------------------|-----------|-------|-------|-------|-------|------|-------|-------|-------|--------|-------|-------|
|                        | 8m        | 8n    | 8o    | 8p    | 8q    | 8r   | 8s    | 8t    | 8u    | 8v     | 8w    | 8x    |
| <b>Renal Cancer</b>    |           |       |       |       |       |      |       |       |       |        |       |       |
| <b>786-0</b>           | 0         | 6.18  | 0     | 29.19 | 4.42  | 0    | 7.3   | 7.16  | 2.21  | 158.41 | 9.29  | 7.84  |
| <b>A498</b>            | 0         | 11.21 | 4.33  | 11.33 | 19.53 | 0    | 7.94  | 8.51  | 22.69 | 9.5    | 0     | 0     |
| <b>RXF 393</b>         | 0         | 24.89 | 0     | 4.12  | 0     | 0    | 7.92  | 0     | 0     | 184.28 | 0     | 0     |
| <b>SN12C</b>           | 7.69      | 19.76 | 0     | 52.23 | 2.54  | 0    | 6.69  | 0     | 7.08  | 143.51 | 0     | 6.73  |
| <b>TK-10</b>           | 4.09      | 0     | 3.89  | 47.23 | 2.58  | 1.85 | 0     | 1.25  | 7.59  | 21.23  | 3.73  | 0     |
| <b>UO-31</b>           | 26.25     | 34.58 | 16.15 | 27.7  | 11.74 | 3.57 | 21.18 | 11.24 | 27.31 | 185.28 | 13.46 | 23.09 |
| <b>Prostate Cancer</b> |           |       |       |       |       |      |       |       |       |        |       |       |
| <b>PC-3</b>            | 20.15     | 0.04  | 0     | 15.41 | 3.62  | 2.42 | 0     | 0     | 9.06  | 134.69 | 0     | 29.7  |
| <b>DU-31</b>           | 6.25      | 48.72 | 3.34  | 21.09 | 6.96  | 0    | 13.00 | 0     | 2.68  | 95.96  | 0     | 9.25  |
| <b>Breast Cancer</b>   |           |       |       |       |       |      |       |       |       |        |       |       |
| <b>MCF7</b>            | 48.42     | 77.22 | 43.98 | 42.49 | 41.69 | 9.73 | 46.14 | 23.37 | 24.61 | 130.79 | 11.71 | 40.59 |
| <b>MDA-MB231/ATCC</b>  | 3.41      | 23.40 | 0     | 23.74 | 0     | 0    | 4.13  | 0     | 7.74  | 180.72 | 0     | 14.27 |
| <b>HS 578T</b>         | 6.59      | 4.55  | 0     | 0     | 12.22 | 6.94 | 6.58  | 4.93  | 20.81 | 54.69  | 0     | 9.03  |
| <b>BT-549</b>          | 0         | 32.33 | 1.67  | 42.66 | 12.63 | 0    | 18.62 | 17.56 | 15.06 | 103.02 | 16.19 | 24.83 |
| <b>T-47D</b>           | 24.98     | 20.48 | 1.30  | 9.88  | 0.68  | 0    | 0     | 5.77  | 0     | 144.48 | 8.33  | 26.85 |
| <b>MDA-MB-468</b>      | 11.31     | 27.43 | 8.86  | 0.62  | 8.03  | 0    | 21.52 | 3.94  | 4.38  | 160.52 | 0     | 2.68  |

nd= not detect
